# Supplementary material for: Eocene lizard from Germany reveals amphisbaenian origins
Source: Springer Nature journal article supplement (doi:10.1038/nature09919), 2011-05-01
Supplement: 41586_2011_BFnature09919_MOESM229_ESM.pdf [file 41586_2011_BFnature09919_MOESM229_ESM.pdf]

## **Contents:**

- 1. Computed Tomographic Methods**
- 2. Additional Imagery**
- 3. Phylogenetic Analysis**
- 4. Data Matrix**
- 5. Morphological Diagnoses and Synapomorphies**
- 6. Principal Component Analysis of Ecomorphology**
- 7. References**

## 1. Computed Tomographic Methods

The fossil specimen was scanned at the Helmholtz Centre Berlin for Materials and Energy using a micro focus x-ray tube (Hamamatsu, L8121-03) at 60 kV, 166  $\mu$ A in small spot mode (focus: 7 $\mu$ m). A 1 mm aluminium window served as beam filter in order to suppress the beam hardening effects. The installed detector was a flat panel sensor (Hamamatsu, C7942SK-05) with 2316x2316 pixels and a resolution of 50  $\mu$ m. Exposure time was 1.3 sec. For each scan 1300 projections were measured over an angular range from 360°. The magnification ratio was 1.9x, corresponding to an effective voxel size of 0.02625 mm for the specimen. Cone beam reconstruction using filtered back-projection algorithm was performed in the software package Octopus (Xraylab, Institute for Nuclear Sciences, Proeftuinstraat 86, 9000 Ghent (Belgium)). The data were visualized and processed by volume rendering software VG Studio Max 2.1. The reconstruction of the skull was performed using a 3D wax model built on the basis the CT data.

Other squamate taxa scanned at the above facility and reconstructed in Octopus include *Eremias* sp. and *Tetradactylus seps*. The remaining squamate taxa *Spathorhynchus fossorium*, *Loveridgea ionidesii*, *Blanus cinereus*, *Gallotia caesaris*, *Dibamus novaeguineae*, *Typhlops vermicularis* and *Varanus acanthurus* were scanned at the Museum für Naturkunde Berlin using a phoenix|x-ray nanotom (GE Sensing & Inspection Technologies GmbH, Wunstorf, Germany) equipped with a 180 kV high-power nanofocus tube with a tungsten target. Reconstructions were performed in datos|x-reconstruction software (GE Sensing & Inspection Technologies GmbH phoenix|x-ray), and data were visualized in VGStudio Max 2.0. See sections 2 and 3 for images and collection numbers.

## 2. Additional Imagery

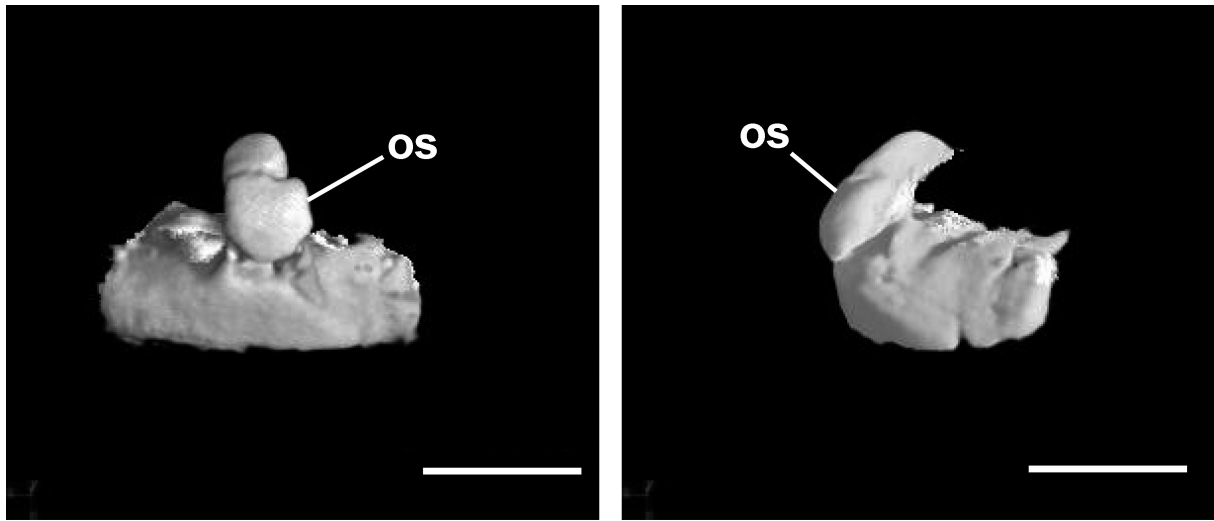

Premaxilla of *Cryptolacerta hassiaca* in anterior (left) and left lateral (right) view. Note the osteoderm (os) on the base of the dorsal process, indicating that the anteriormost part of the snout was protected, possibly in relation to digging behaviour. As can be seen, the bone is not distorted and the snout was therefore slightly downturned. Scale bars equal 1 mm.

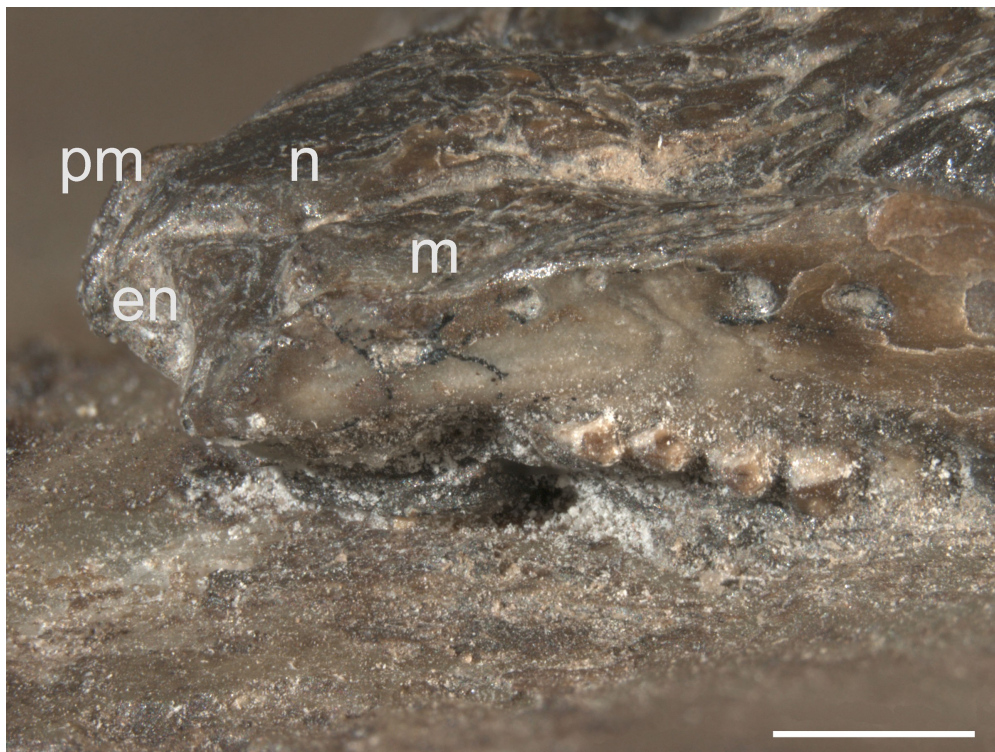

Photograph showing the snout of *Cryptolacerta hassiaca* in left lateral view. Note the anteromedial flange of the maxilla covering most of the posterodorsal part of the external naris (en). m, maxilla; n, nasal; pm, premaxilla. Scale bar equals 1 mm. Photograph taken by Henrik Stöhr.

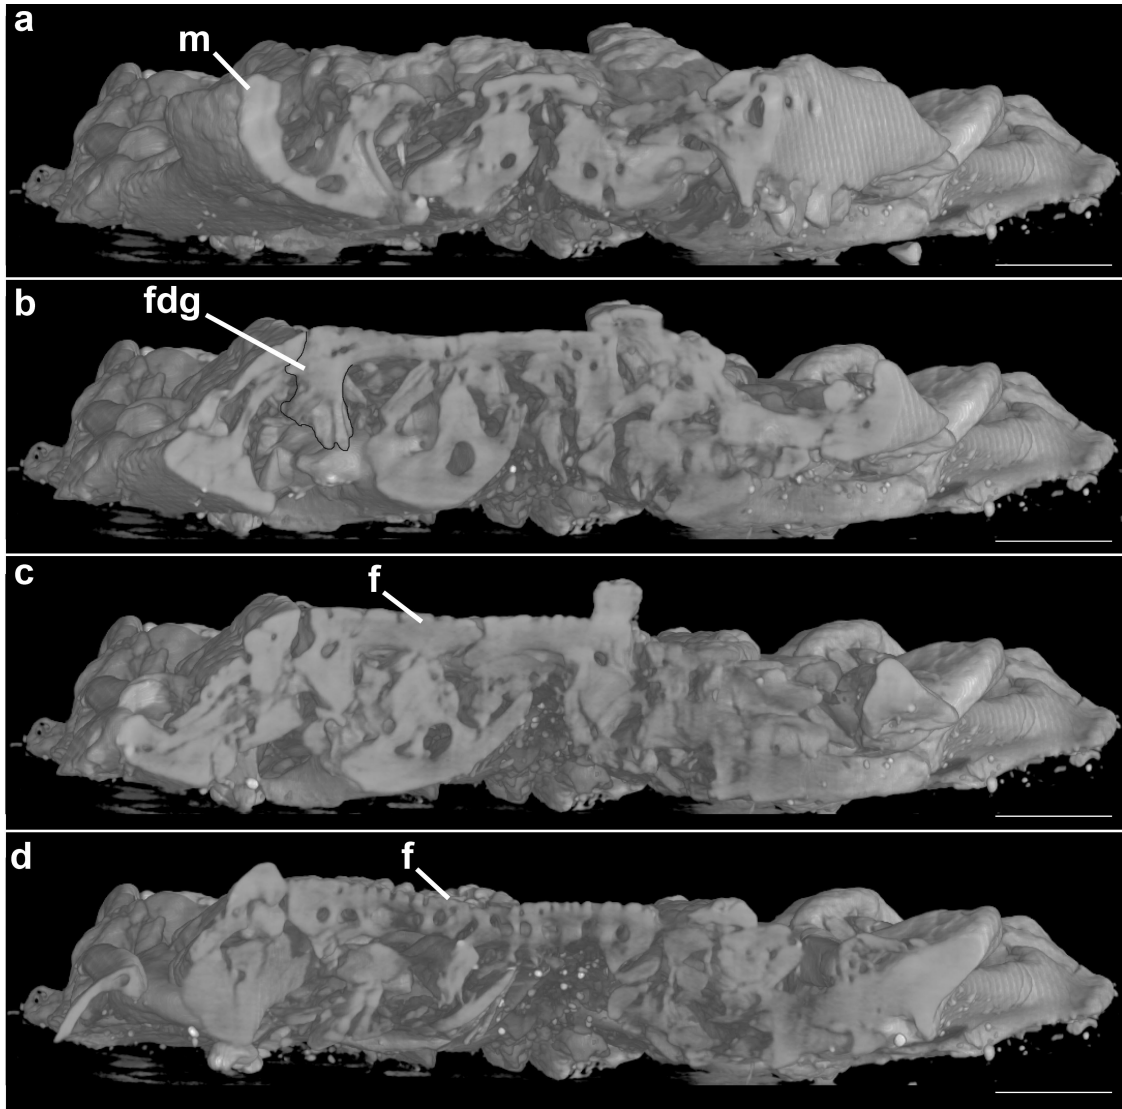

*Cryptolacerta hassiaca*, 3D transverse CT cross sections through the anterior half of the skull, from anterior to posterior a) at the mid level of the maxilla (m), note the thickness of the bone and the lack of vascularization; b) at the level of the frontal downgrowth (fdg), note the transverse width of the process and the overall 'short and broad' appearance (the black line denotes the outline of the downgrowth); c) at the level slightly posterior to the anterior edge of the frontals (f), note the thickness of the bone and the lack of vascularization; d) at the posterior level of the frontals, note the decrease in bone density resulting in a well-vascularized bone. Scale bars equal 1 mm.

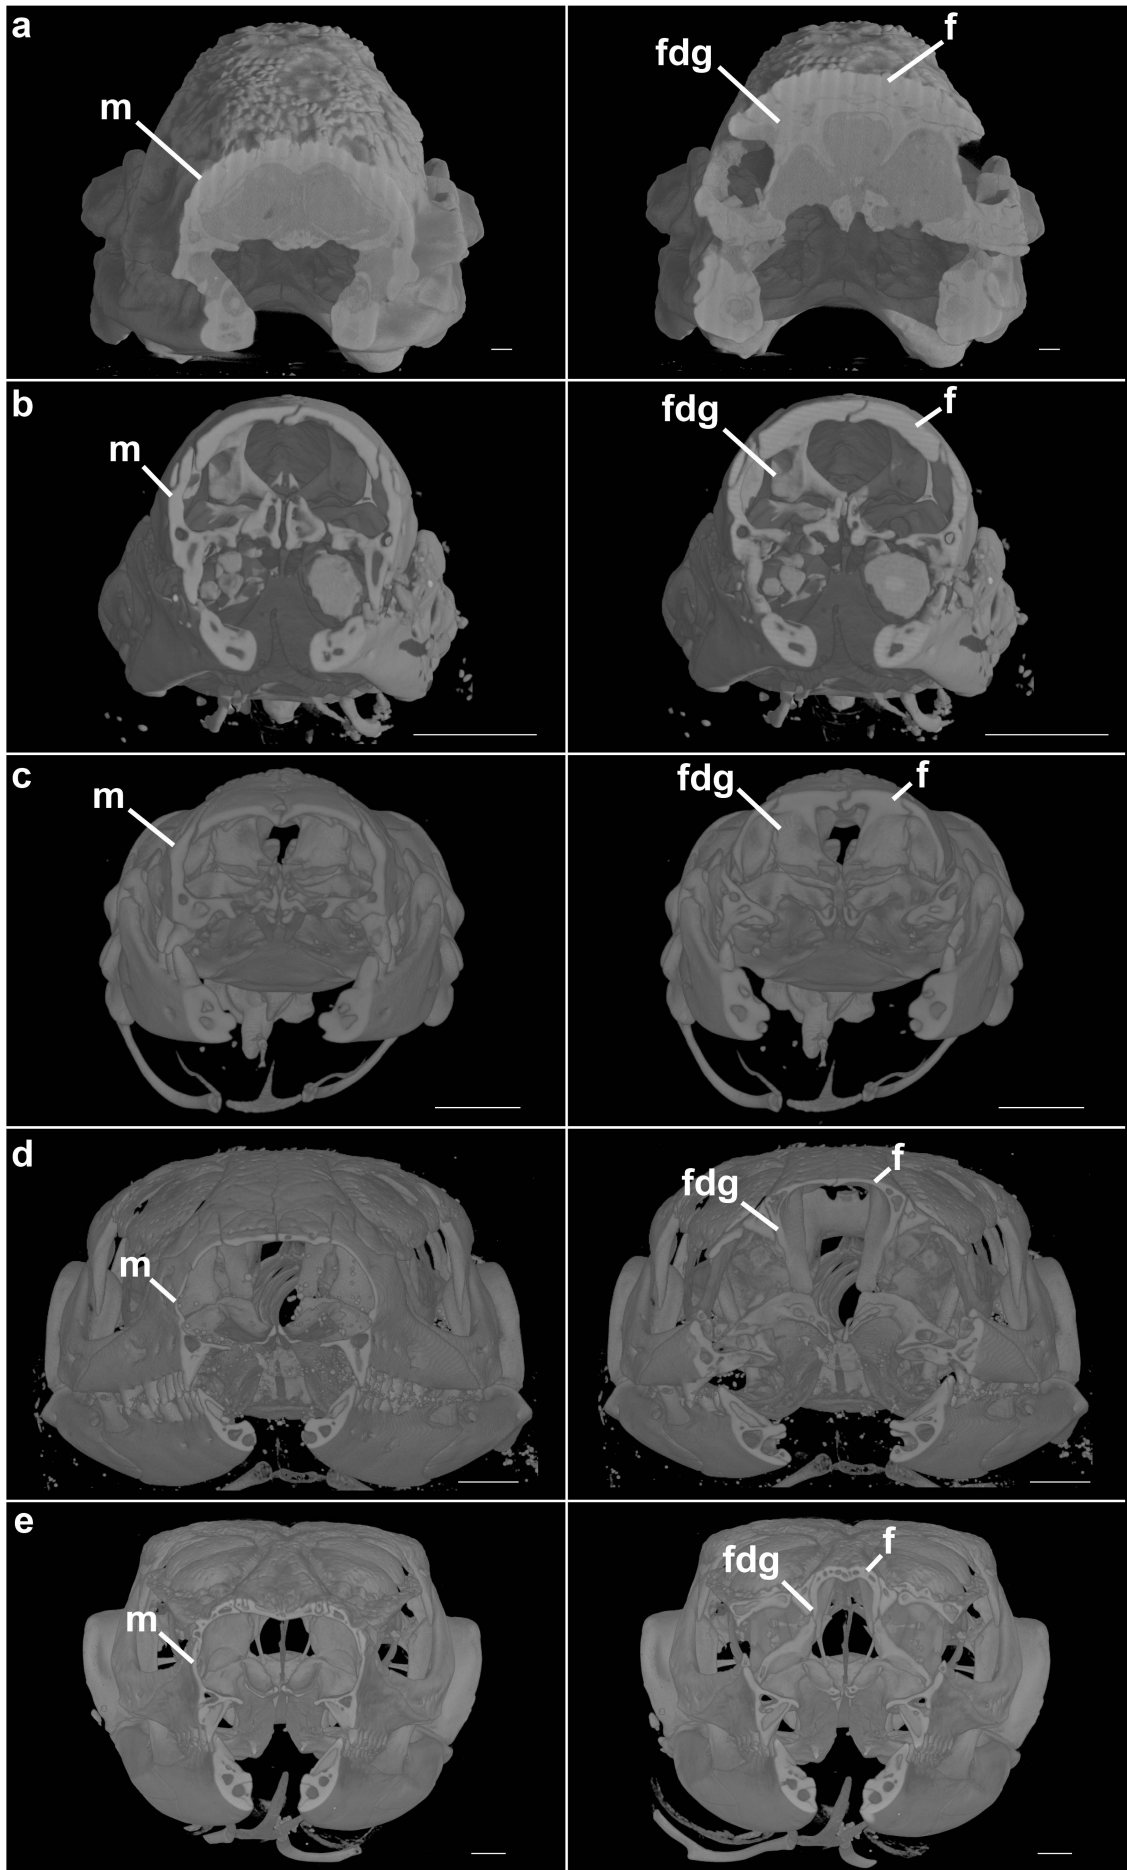

Previous page: 3D transverse CT cross sections through the mid level of the snout (left) and the anterior parts of the frontals at the level of the frontal downgrowths (right) of selected amphisbaenians and lacertids. a) the Eocene amphisbaenian *Spathorhynchus fossorium*; b) the amphisbaenid amphisbaenian *Loveridgea ionidesii*; c) the blanid amphisbaenian *Blanus cinereus*; d) the lacertid *Gallotia caesaris*; e) the lacertid *Eremias* sp. Note the difference in the shape of the frontal downgrowths between amphisbaenians and lacertids, as well as the difference in thickness and bone density of maxilla and frontal. Scale bars equal 1 mm. For collection numbers see section 3.

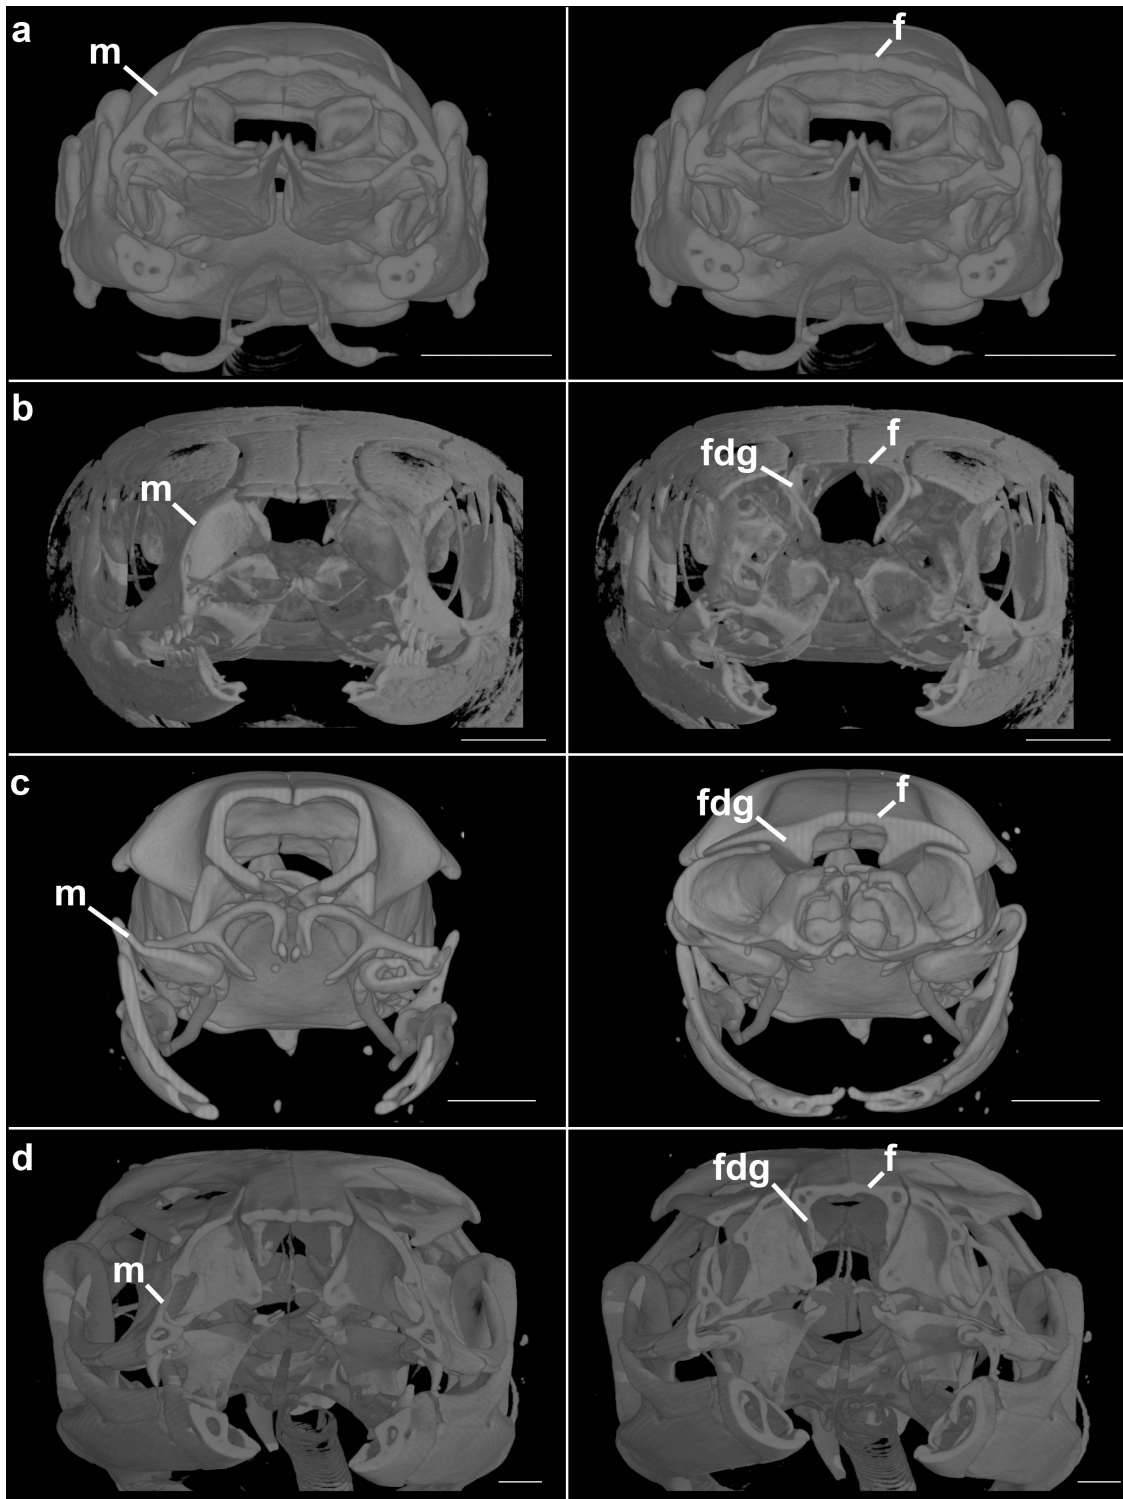

3D transverse CT cross sections through the mid level of the snout (left) and the anterior parts of the frontals at the level of the frontal downgrowths (right) of selected squamate outgroup taxa. a) the dibamid *Dibamus novaeguineae*; b) the cordylid *Tetradactylus seps*; c) the blind snake *Typhlops vermicularis* (note the change in ordering: the right section showing the frontal downgrowth is further anterior than the left section showing the maxilla); d) the varanid *Varanus acanthurus*. Scale bars equal 1 mm. For collection numbers see section 3.

### 3. Phylogenetic analysis

Phylogenetic analyses were performed using both morphological and molecular data since the two data sets result in divergent hypotheses of squamate relationships, especially the relationships of amphisbaenians. We used two genetic markers (*rag-1* and *c-mos*) in combination with the morphological characters. Analyses were performed on the dataset below using Mesquite 2.6<sup>31</sup> to combine morphological and molecular data. The total number of taxa was 65.

Parsimony analysis was carried out with the software package TNT 1.1.<sup>32</sup> using the “new technology” search option, with the implementation of all 4 search algorithms (sectorial search, ratchet, drift, and tree fusing), level 10 for most aggressive searches and 50 replications. Bayesian analysis was performed using MrBayes 3.2<sup>33</sup>. The data set was partitioned into morphological and molecular components; for the molecular data the GTR+gamma+I model was implemented, and for the morphological data the Mk model + gamma was used (4 rate categories for the gamma shape parameter). A previous run without implementing a gamma shape parameter for the morphological characters was not supported according to Bayes factor comparison. All uninformative morphological characters were deleted prior to the analysis, as they may affect the result if the data are to be analyzed in a likelihood framework<sup>34,35</sup>. Two runs with 4 chains each were performed for 20,000,000 generations to ensure the runs reached stationarity, with a sampling every 100 generations, and a burnin set to 5000 sampled generations.

#### Morphological data

The morphological data set is based on a previously published analysis of squamate relationships<sup>9</sup>; however, multiple non-germane terminal taxa were collapsed into higher-order clades to facilitate runs (in fact, [9] used the “ratchet” option in TNT 1.1 to obtain a



hypothesis of phylogenetic relationships due to the great amount of ambiguity introduced by fossils). *Cryptolacerta* was added to the data set, and Lacertidae were broken down into 3 individual taxa: *Gallotia* as a representative of Gallotiinae, one of the two major clades of crown lacertids<sup>24</sup>, *Eremias* as a representative of Lacertinae, the sister group to gallotiines, and the Oligocene lacertid *Dracaenosaurus*. Scorings were based on personal observations (see below for the list of examined specimens) and on the literature<sup>1, 15, 36-38</sup>. In addition, the following recodings were performed for amphisbaenians and *Eolacerta*: *Eolacerta*: #166-0 (mandible, fusion of articular, prearticular, and surangular: *Eolacerta* recoded as (0) based on personal observations); Amphisbaenia: #76-1 (parietal, descensus parietalis: recoded as (1) because we consider the parietal ventral extension to be a synapomorphy with the condition in Lacertidae); Amphisbaenidae, Blanidae, Trogonophidae: #37-(-) (prefrontal, contact with postorbitofrontal: recoded as (-) because the derived condition of extant amphisbaenids, blanids, and trogonophids makes the coding of this character impossible); Bipedidae: #55-1 (frontals, unfused or fused in adults: recoded as (1) based on observations on a CT-scanned specimen of *Bipes* on [www.digimorph.org](http://www.digimorph.org)), Rhineuridae: #33-01 (maxilla, posterior extent of tooth row long or short: recoded as (01) due to variation in extant and fossil rhineurids), #92-0 (postfrontal shape, elongate or irregular: recoded as (0) based on fossil rhineurids<sup>13,14</sup>), #93-1 (postfrontal, contact with parietal absent or present: recoded as (1) based on fossil rhineurids<sup>13,14</sup>), #94-1 (postorbitofrontal, fusion absent or present: recoded as (1) based on fossil rhineurids<sup>13,14</sup>), #95-? (postorbital, present or absent: recoded as (?) based on fossil and extant rhineurids), #105-1 (ectopterygoid, direction mediolateral or anterolateral: recoded as (1) as we interpret the direction to be anterolateral in rhineurids), #121-0 (pyriform recess, absent or present: recoded as (0) as we consider the pyriform recess to be absent in rhineurids), #130-01 (orbitosphenoid, not azygous or azygous: recoded as (01) because a paired orbitosphenoid is present in the fossil *Rhineura hatcherii*<sup>15</sup>), #165-1 (extracolumella tissue, not calcified or calcified: recoded as (1) because we consider the tissue to be calcified in rhineurids), #202-01

(angular, present or absent: recoded as (01) due its variation in extant and fossil rhineurids).

Furthermore, the following characters were modified or replaced:

#1 (skull, percentage of total length made up by antorbital snout): modified into a simpler version as the previous definition largely applied to mosasurs only: Postorbital skull table length: (0) less than one half of skull; (1) one half of skull or more.

#7 (dermal sculpturing): modified into: surface of facial bones: (0) smooth; (1) rugose (based on #33 [1]).

#18, (premaxilla, contact with nasals): this character was uninformative and was replaced by: Premaxilla, nasal process: (0) short, not intersecting between nasals; (1) long, intersecting between nasals (modified from #32 [1]).

#37 (contact between prefrontal and postorbitofrontal): modified into: (0) absent; (1) present, pointy contact; (2) present, sutural contact.

#162 (quadrate, tympanic crest): modified into a simpler version, as the previous definition largely applied to mosasaurs only: (0) tympanic crest on quadrate present; (1) tympanic crest absent.

#355 (M. intermandibularis anterior superficialis): this character was uninformative and was replaced by: Snout, orientation: (0) straight anteriorly (0); (1) sloping anteroventrally ('downturned') (modified from #24 [1]).

#356 (M. intermandibularis anterior profundus apneurosis): this character was uninformative and was replaced by a new character for squamate relationships: Frontal subolfactory processes: (0) narrow and slender, more than double as deep as wide; (1) transversely widened and of stout appearance, less than double as deep as wide [n.a. when frontal downgrowths are absent].

#358 (M. mandibulohyoideus II): this character was uninformative and was replaced by a new character for squamate relationships: Frontal in transverse cross section : (0) thin sheet of bone; (1) notably thickened and with increased bone density, vascularization not visible (1).

#359 (*M. mandibulohyoideus* III): this character was uninformative and was replaced by a new character for squamate relationships: Maxilla in transverse cross section :(0) thin sheet of bone; (1) notably thickened and with increased bone density, vascularization not visible (1).

#362 (Muscle “X”): this character was uninformative and was replaced by: Position of external nares: (0) lateral-anterolateral; (1) anterior-anterioventral (modified from #37, [1]).

#363 (*M. sternohyoideus*): this character was uninformative and was replaced by: Orbit height: more than one half of the skull height at the orbit level (0); one half of skull height or less [this character is independent of the completeness of the orbital rim] (modified from #10 [1]):

#364 (biogeographic distribution): we consider it doubtful to use biogeographic occurrence as a phylogenetic character, which is why we replaced this character with a new one for squamate relationships: Suture between frontals: (0) vertically straight; (1) strongly interdigitating tongue-and-groove articulation (1).

### **Specimens examined:**

Institutional Abbreviations: ROMV-R, Royal Ontario Museum; UCMP, University of California Museum of Paleontology; USNM, Smithsonian Institution, National Museum of Natural History; ZFMK, Zoologisches Forschungsinstitut und Museum Alexander Koenig Bonn; ZMB, Museum für Naturkunde Berlin.

*Gallotia caesaris*, ZMB 29489 (CT scan); *Gallotia goliath* ZFMK58250; *Gallotia stehlini* ZFMK 7881; *Eremias sp.* ZMB uncatalogued (CT scan); *Podarcis pityusensis* private collection M. Kroniger (CT scan); *Loveridgea ionidesii* ZMB uncatalogued (CT scan); *Blanus cinereus* ZMB 10974 (CT scan); *Spathorhynchus fossorium* USNM V 26317 (CT scan); *Amphisbaena alba*, ROMV-R 0357; *Bipes biporus* UCMP 1198020, UCMP 137630, UCMP 137868; *Dibamus novaeguineae* ZMB 50450 (CT scan); *Cyclura cornuta* ZFMK 5223; *Cordylus tropidosternum* ZFMK 7810; *Gerrhosaurus major* ZFMK 56403; *Tetradactylus*

*seps* private collection M. Cunningham (CT scan); *Echinosaura horrida* ZFMK 7274; *Chalcides ocellatus* ZFMK 7850; *Ameiva ameiva* ZFMK 59020; *Xantusia henshawi* ZFMK; *Varanus acanthurus* ZMB 37676 (CT scan); *Varanus salvator* ZFMK 14862; *Typhlops vermicularis* ZMB 4409 (CT scan).

In addition, CT scans of the entire range of squamate diversity, as present on [www.digmorph.org](http://www.digmorph.org) as of January 17, 2011, were investigated. We also considered the following references for scoring the new characters for non-lacertibaenian taxa: [10, 11, 28], Bellairs 1950<sup>39</sup>, Evans & Barbadillo 1997<sup>40</sup>, Evans & Manabe 1999<sup>41</sup>, Gao & Norell 2000<sup>42</sup>, Rieppel 1981<sup>43</sup>, 1984<sup>44</sup>, Rieppel et al. 2007<sup>45</sup>, Wu et al. 1996<sup>46</sup>.

### Molecular data

The *rag-1* and *c-mos* data for 39 extant squamate taxa were mostly taken from [3], with some additional taxa retrieved from GenBank. The data set was re-aligned in SeaView 2.3<sup>47</sup> using the Clustal algorithm. In total 2842 sites of *rag-1* and 374 sites of *c-mos* were considered.

The following taxa were used (if no Genbank accession number is given, then the taxon is from the [3] data set):

#### *rag-1*:

|                      |                                     |
|----------------------|-------------------------------------|
| RHYNCHOCEPHALIA:     | <i>Sphenodon punctatus</i>          |
| DIPLODACTYLINAE:     | <i>Pseudothecadactylus lindneri</i> |
| GYMNOPHTHALMIDAE:    | <i>Leposoma parietale</i>           |
| TEIIDAE:             | <i>Cnemidophorus tigris</i>         |
| CORDYLOIDEA:         | <i>Cordylus polyzonus</i>           |
| <i>Xenosaurus</i> :  | <i>Xenosaurus grandis</i>           |
| <i>Shinisaurus</i> : | <i>Shinisaurus crocodilurus</i>     |

|                      |                                              |
|----------------------|----------------------------------------------|
| <i>Lanthanotus:</i>  | <i>Lanthanotus borneensis</i>                |
| <i>Anniella:</i>     | <i>Anniella pulchra</i>                      |
| ANILIOIDEA :         | <i>Cylindrophis rufus</i>                    |
| NeoMACROSTOMATA:     | <i>Agkistrodon piscivorus</i>                |
| <i>Xenopeltis:</i>   | <i>Xenopeltis unicolor</i> EU402870.1        |
| <i>Xantusia:</i>     | <i>Xantusia vigilis</i>                      |
| <i>Lepidophyma:</i>  | <i>Lepidophyma flavimaculatum</i> DQ249134.1 |
| <i>Gallotia</i>      | <i>Gallotia galloti</i> EF632215.1.          |
| <i>Eremias</i>       | <i>Eremias</i> sp.                           |
| <i>Bipes:</i>        | <i>Bipes biporus</i>                         |
| <i>Blanus:</i>       | <i>Blanus strauchi</i> AY444050.1            |
| AMPHISBAENIDAE:      | <i>Amphisbaena</i> sp.                       |
| TROGONOPHIDAE:       | <i>Trogonophis wiegmanni</i>                 |
| RHINEURIDAE:         | <i>Rhineura floridana</i>                    |
| CHAMAELEONIDAE:      | <i>Chamaeleo rudis</i>                       |
| <i>Physignathus:</i> | <i>Physignathus cocincinus</i>               |
| <i>Agama :</i>       | <i>Agama agama</i> AY487356.1                |
| CROTAPHYTIDAE:       | <i>Crotaphytus collaris</i> AY988014.1       |
| IGUANIDAE:           | <i>Sauromalus obesus</i>                     |
| TROPIDURIDAE:        | <i>Tropidurus hispidus</i> AY988013.1        |
| SCELOTINAE:          | <i>Proscelotes eggeli</i>                    |
| ACONTINAE :          | <i>Acontias meleagris</i>                    |
| SCINCINAE:           | <i>Manuya aurata</i>                         |
| FEYLININAE:          | <i>Feylinia polylepis</i>                    |
| DIBAMIDAE:           | <i>Dibamus</i> sp.                           |
| HELODERMATIDAE:      | <i>Heloderma suspectum</i>                   |

|                        |                                                    |
|------------------------|----------------------------------------------------|
| <i>Gekko:</i>          | <i>Gekko gecko</i>                                 |
| <i>Teratoscincus:</i>  | <i>Teratoscincus przewalskii</i>                   |
| VARANIDAE:             | <i>Varanus griseus</i>                             |
| <i>Typhlops:</i>       | <i>Typhlops jamaicensis</i> EU402866.1/AY487387.1  |
| <i>Leptotyphlops :</i> | <i>Leptotyphlops columbi</i> EU402851.1/AY487383.1 |
| PYGOPODIDAE:           | <i>Lialis jicari</i>                               |
| <b><i>c-mos:</i></b>   |                                                    |
| RHYNCHOCEPHALIA:       | <i>Sphenodon punctatus</i>                         |
| DIPLODACTYLINAE:       | <i>Pseudothecadactylus lindneri</i>                |
| GYMNOPHTHALMIDAE:      | <i>Bachia dorbignyi</i>                            |
| TEIIDAE:               | <i>Tupinambis quadrilineatus</i>                   |
| CORDYLOIDEA:           | <i>Cordylus cordylus</i>                           |
| <i>Xenosaurus:</i>     | <i>Xenosaurus grandis</i>                          |
| <i>Shinisaurus:</i>    | <i>Shinisaurus crocodilurus</i>                    |
| <i>Lanthanotus:</i>    | <i>Lanthanotus borneensis</i>                      |
| <i>Anniella:</i>       | <i>Anniella pulchra</i> AY487350.1                 |
| ANILIOIDEA :           | <i>Cylindrophis rufus</i>                          |
| NeoMACROSTOMATA:       | <i>Agkistrodon piscivorus</i>                      |
| <i>Xenopeltis:</i>     | <i>Xenopeltis unicolor</i> AF544689.1              |
| <i>Xantusia:</i>       | <i>Xantusia vigilis</i>                            |
| <i>Lepidophyma:</i>    | <i>Lepidophyma sylvaticum</i> AY217891.1           |
| <i>Gallotia:</i>       | <i>Gallotia galloti</i>                            |
| <i>Eremias:</i>        | <i>Eremias arguta</i> EF632258.1                   |
| <i>Bipes:</i>          | <i>Bipes biporus</i>                               |
| <i>Blanus:</i>         | <i>Blanus strauchi</i> AY444024.1                  |

|                        |                                         |
|------------------------|-----------------------------------------|
| AMPHISBAENIDAE:        | <i>Amphisbaena xera</i>                 |
| TROGONOPHIDAE:         | <i>Diplometophon zarudnyi</i>           |
| RHINEURIDAE:           | <i>Rhineura floridana</i> AY444022.1    |
| CHAMAELEONIDAE:        | <i>Chamaeleo jacksonii</i>              |
| <i>Physignathus</i> :  | <i>Physignathus cocincinus</i>          |
| <i>Agama</i> :         | <i>Agama agama</i> AF137530.1           |
| CROTAPHYTIDAE:         | <i>Crotaphytus collaris</i> AY987985.1  |
| IGUANIDAE:             | <i>Sauromalus obesus</i>                |
| TROPIDURIDAE:          | <i>Tropidurus hispidus</i> AY987984.1   |
| SCELOTINAE:            | <i>Proscelotes eggeli</i>               |
| ACONTINAE :            | <i>Acontias meleagris</i>               |
| SCINCINAE:             | <i>Eumeces skiltonianus</i>             |
| FEYLININAE:            | <i>Feylinia polylepis</i>               |
| DIBAMIDAE:             | <i>Dibamus sp.</i>                      |
| HELODERMATIDAE:        | <i>Heloderma suspectum</i>              |
| <i>Gekko</i> :         | <i>Gekko gecko</i> AY444028.1           |
| <i>Teratoscincus</i> : | <i>Teratoscincus przewalskii</i>        |
| VARANIDAE:             | <i>Varanus salvator</i>                 |
| <i>Typhlops</i> :      | <i>Typhlops jamaicensis</i> AF544733.1  |
| <i>Leptotyphlops</i> : | <i>Leptotyphlops columbi</i> AF544718.1 |
| PYGOPODIDAE:           | <i>Lialis burtonis</i>                  |

### Results: parsimony analysis

The parsimony analysis resulted in 6 most parsimonious trees (7944 steps). In all trees, *Cryptolacerta* falls as sister taxon to amphisbaenians (see below for the strict consensus). It requires 15 additional steps to group *Cryptolacerta* with Lacertidae, 19 steps to place

*Cryptolacerta* outside Lacertibaenia, and 8 steps to collapse Lacertibaenia. A bootstrap analysis (1000 replications) showed a support of 74% for the grouping *Cryptolacerta*/Amphisbaenia, whereas Lacertibaenia as a whole received support below 50%. (see below).

Apart from the position of *Cryptolacerta*, other noteworthy results of the parsimony analysis are: 1) the phylogenetic position of the Eocene *Dracaenosaurus* within crown Lacertidae, thus supporting the hypothesis of a deep Paleogene origin of modern lacertids, as recently proposed<sup>24</sup>; 2) the grouping of mosasaurs with snakes instead of anguimorphs; 3) the sistergroup relationship between xantusiids and *Eolacerta*.



Strict consensus of 6 trees; bootstrap values >50% are indicated:

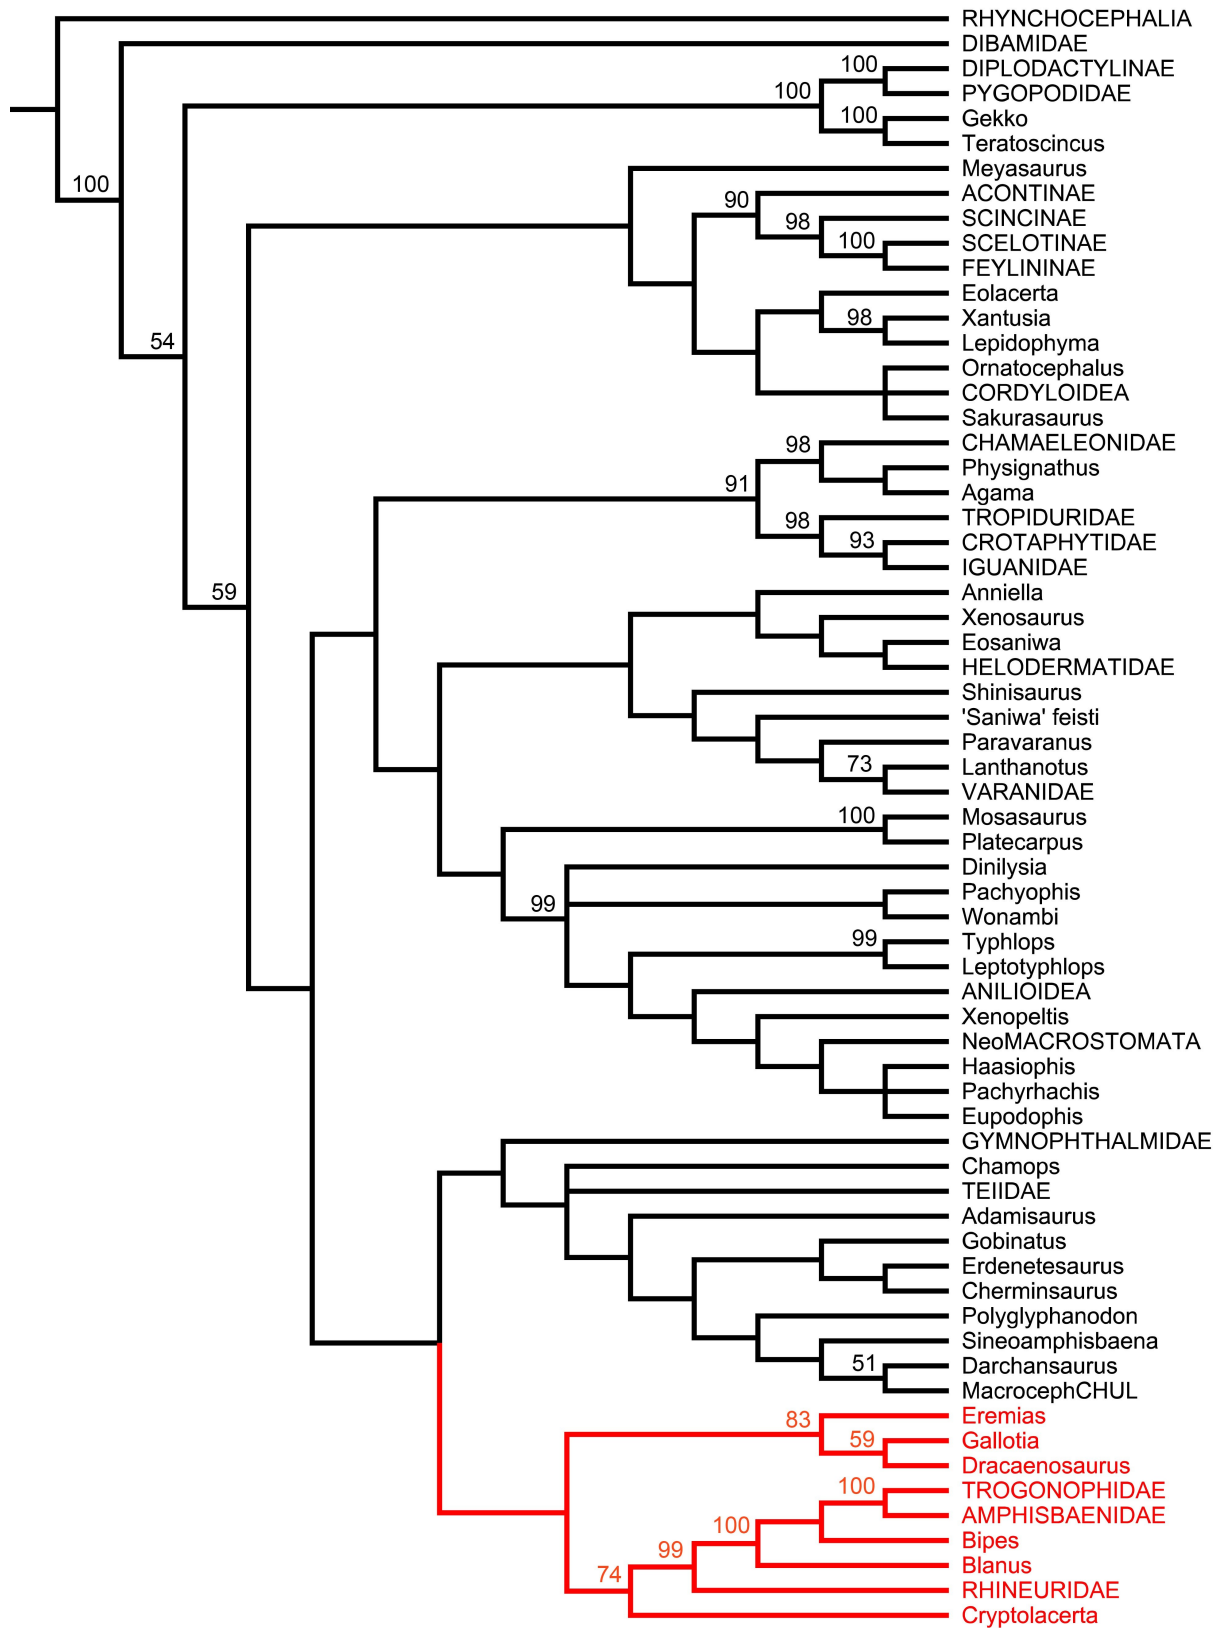

**Results: Bayesian analysis**

In the Bayesian runs, *Cryptolacerta* again groups as sister taxon to *Amphisbaenia* (see below), with a fairly high support of 0.9. *Lacertibaenia* as a whole receives very strong support of 1. While the position of *Dracaenosaurus* within crown lacertids remains the same as in the parsimony analysis, mosasaurs cluster with anguimorphs and *Eolacerta* groups with the Mesozoic *Meyasaurus*. *Blanus* und *Bipes* cluster as sister taxa, although support for this grouping is low.

Allcompat consensus tree with percentages indicating posterior probabilities:

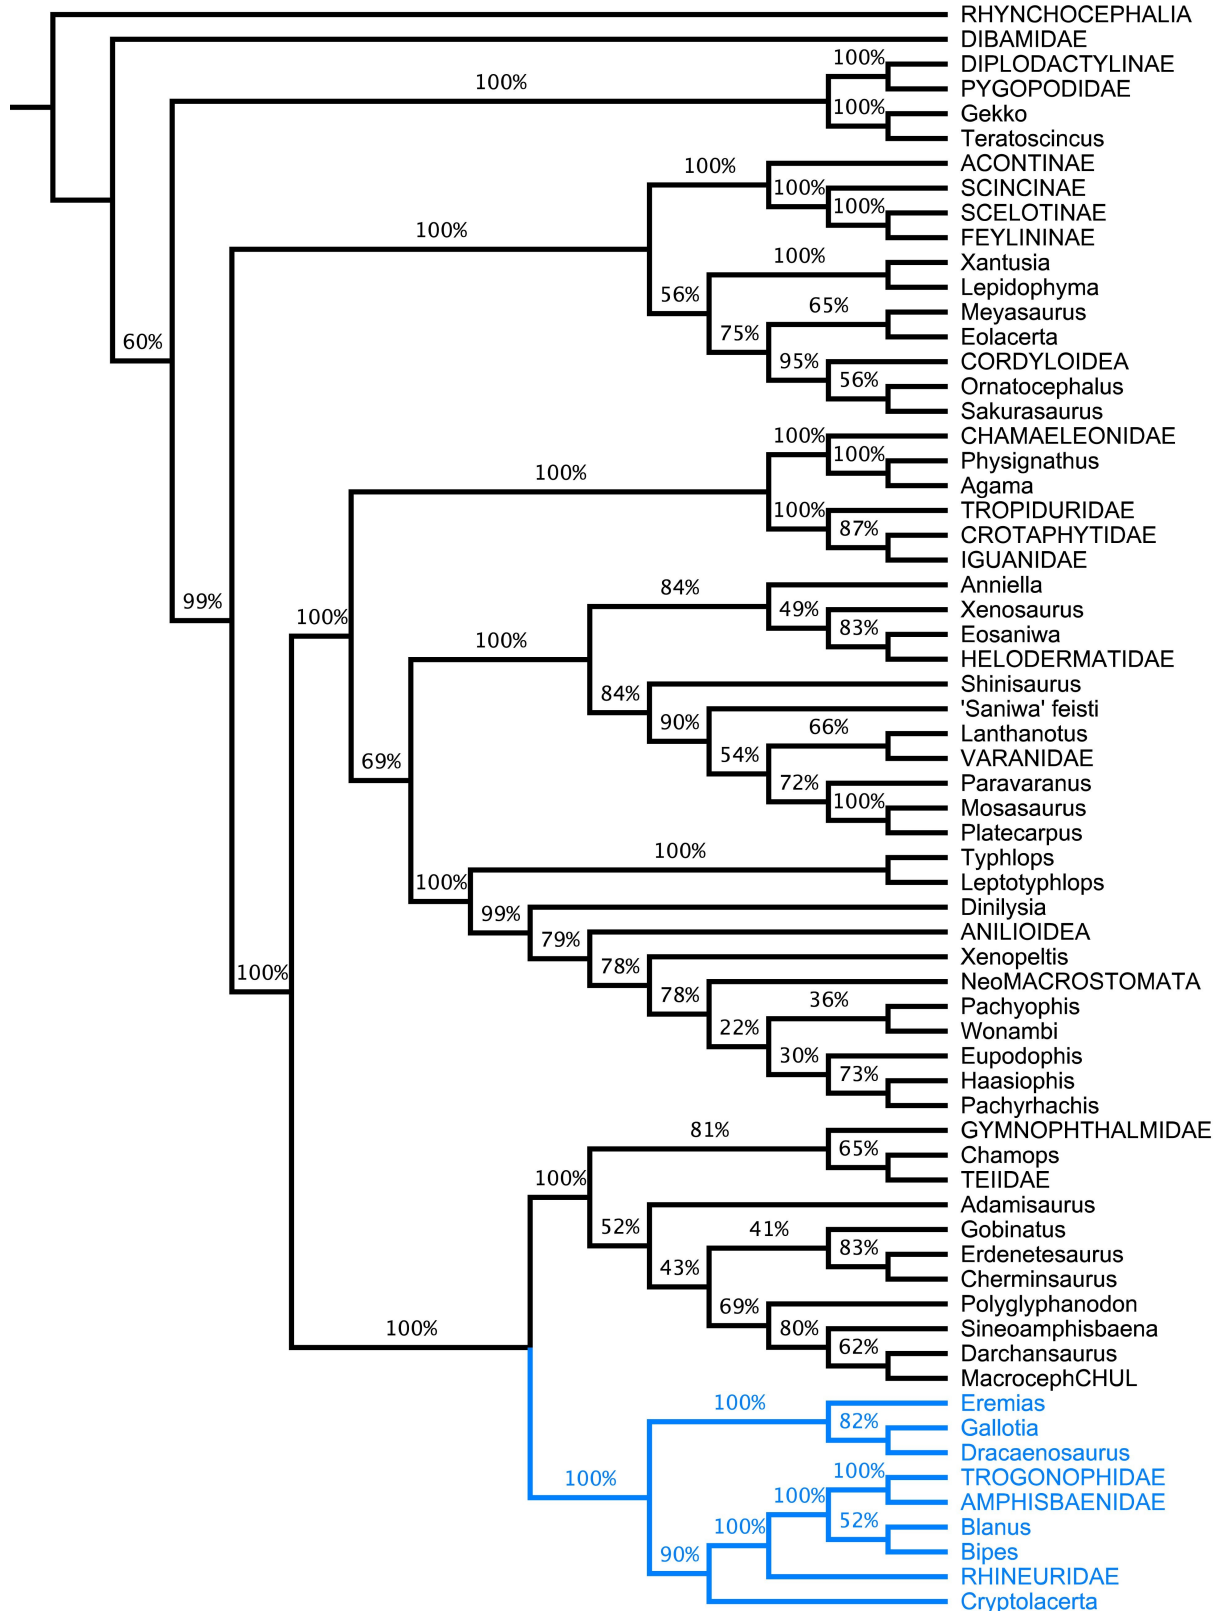

### 4. Data Matrix

#NEXUS

BEGIN TAXA;
DIMENSIONS NTAX=65;
TAXLABELS RHYNCHOCEPHALIA DIPLODACTYLINAE Gekko Teratoscincus PYGOPODIDAE Xenosaurus Eosaniwa Shinisaurus
"SanIwa" feisti' HELODERMATIDAE Lanthanotus VARANIDAE Mosasaurus Platecarpus Anniella Typhlops Leptotyphlops ANILIOIDEA
NeoMACROSTOMATA Xenopeltis Dimylisia Haasiophis Pachyrhachis Eupodophis Pachyophis Wonambi Xantusia Lepidophyma
GYMNOPHTHALMIDAE Chamops TEIIDAE Polyglyphanodon Erdenetesaurus Adamisaurus Cherminsaurus Gobinatus Darchansaurus
MacrocephCHUL Sineoamphisbaena CHAMAELEONIDAE Physignathus Agama CROTAPHYTIDAE IGUANIDAE TROPIDURIDAE
Ornatocephalus CORDYLOIDEA SCELOTINAE ACONTINAE SCINCINAE FEYLININAE DIBAMIDAE Meyasaurus Paravaranus
Sakurasaurus Eolacerta Bipes Blanus AMPHISBAENIDAE TROGONOPHIDAE RHINEURIDAE Gallotia Eremias Dracaenosaurus
Cryptolacerta ;

END;

BEGIN CHARACTERS;
DIMENSIONS NCHAR=3403;
FORMAT DATATYPE = STANDARD GAP = - MISSING = ? SYMBOLS = " 0 1 2 3 4 5 6 7 A C T G S Y E F H J K L M N P Q R 9 8 U V
W X D ";

MATRIX

RHYNCHOCEPHALIA 000000000010200000001(1 2)0000(0 1)0000000000(1 2)000000(0 1)000101000000-0-0000100-11000-
00000000?000?100200000000?00000000000001-10000?000000000000000000001000000000?000100001000--0001--0010(0 1)300-01---
00000?--0000-0000000(0 1)0(0 1)0000(0 1)000000000010-0(0 1)01-020(0 1)000100000000?01000000000?000000-
0000000010000001000001-000000-00----000?00000000----?00?0000?00??0?000100(0 1)00-000-100-
TGCAGACAGTTGGAAAAGATGCCAACAATCTGAAATCAAAGGAGAATGCAGCTCATCAAGCAAAACTGCAGCAGCTTTGCCG
TATTTGTGGGGTTTCATTTAAAACCTGACCGATACAAGAGAAGTCAATCCAGTGCATGGGCCAGTGGACAATGAAACCCAGGCATC
TCTAAAGAAAAGAAAAGAAAAGAGTGACATCTTGGCCAGAAGTATTTGCCAAGGTTTAAAGACTGACGTGAGAGGAGATATTG
ACACAATTCATCCTACCCATTTTTGCCATAACTGCTGGAGCATCATCCACAGAAAGTTCAGTAATGCCCATGTGAAGTGTATTT
CCCAAGGAACAGCACCATGAAGTGGCAGCCTCACTCATTGAAGTGTGAGGTTTGTGGCACTGCTCATCGTGGGGTCAAGAGAA
AGAAGCAACCCTGAACCTGCCATTGGGCAAGAGACTCAAGGTCACCTGCAC-----
AAAAAATCAAGGGCATGAAGAACCAGACTGATGAAGAATAAAAAACCTCATGAAAAGGATTGCTAACTGCAAGAATATAACAC
CTCAGTACCAAGATTCTTGCAGTAGACTATCTGCAAAATTTGTGAAGTCCATCTCTTGCAGGTTTGTGAGCATATTCTGGCTG
ACCCAGTGGAAAACAACATGCAAGCATTATTCTGCAAGACCTGTATTCTTAAATGCCTCAAAGTTATGGGACGCTATTGCCCTC
CTGTGCATATCTTGTCTCCCTACTGATCTGGAGAGCCAGTAAAGTCTTCTGAAACATCCTTAATTTCTTGGCTGTGAGATGC
CCAATGAAAGAAATGTGATGAAGAGGTTCCATTGGGTAAATATGGCGTACACATCTCCAGTACAAGAGGCGAAAAGAGAAA
GGCTTATGCACACATAAATAAAGGTGGCCGACCAAGACAACACCTACTGTCTGTTGACCAGGAGAGCTCAAAAGCACCCGCTGA
GAGAGCTTAAGCTTCAAAGTCAAAGCTTTTGGCGAGAAAAGAAGAGGAGAGATGTAAGTCTGTGTGCCTGACTTTGTTTTG
CTGGCTTTAAGAGCCAGAAATGAACACAGACAAGCTGATGAGCTGGAAGCTATCATGCAAGGAAAAGGATCAGGGCTTCATCC
AGCTGTTTGTGGTCCAGTCAACACCTTTCTAAGCTGTCAGCCAGTACCATAAAATGTACAGGACTGAAAAGCCATAAC
AGGGAGGCAAACTCTCCAGCCTGATGCTCTCCGAAGTCTGAGAAAAGCCCTTCTGCCAGGATACCATCCATTGAGTGGAC
ACCTCTCTGAAAAATGTATCCACTAATACAGAAGTAGGCATTATGGATGGGCTCTCAGGGCTACCCTCTCAGTTGATGACTAC
CCAGTAACCACAATGCAAAAGAGATTTCTGTTATGATTCAGCCTTGGTTTCAGCACTAATGGATGGAAGAAAGACATCCTGGAA
GGAATGAAATCTCAAGACTGGATGACTACCTGAATGGCCCTTCACTGTGGTGGTAAAGGAGTCTTGTGATGGTATGGGAGAT
GTCAGTGAGAAGCTGATGGAGTGTGCCAGCTGTCCAGAGAAAGGCGAGTTCGATTCTTTTACACTCATGACTATACATAGCT
CATGACAATAAAAAATGTAAGGATCTTTGAAGAAGCCAAACCAACTCAGAATTATGTTGCAAACCTTTGTGCCTTATGCTGGCG
GATGAATCAGATCATGAGACTTGACAGCCATCTGAGTCTCTCaTAGCAGAAAAGAGAAGCCATGAAAAGCAGTGTGCTTATG
CTTGAGATGGGAGGAATTTCTTAGAGCATTCAAATTCATCTTCAAGGGCACAGGATATGATGAGAAAATGTCCGTGAAGTCCGAG
GGCCTTGAAGTCTCAGTTTACTTACTTACATCTGCACCTTTGTGTAAGCCTTGGAAAGCCTCCAGATCCCAAGTGTGGTCTTCCACT
CCATCACCAGGAGCCACTGAAAACCTGGAGCGGTACGAAGTGTGGCGTCCAATCCATACCACGAGTCAAGTTGAGGAGCTA
CGCGACAGAGTGAAGGGTGTCTGCAAAACCTTTCATTGAGACTGTTCTTCCGATAGATGCACTGCACTGTGACATTGGCAAT
GCAGCGGAGTTCTACAAGATATCCAGTTTGTGATCGGTGAGGCATACAAAAACCTAATGCACTGAAAAGAGAGGAAAAG
GTGGCAGTCAACTCTTGCAAGCATCTCAGAAAAGAAAATGAACCTTGAAACCAATAATGAGGATGATGAAAACCTTGTGATAGAA
AGCTCATGACCAAAGAAACAGTGAAGCAGTATGTGAATTAATAAAAAGTGAAGAAAAGACATGAAGCCCTAAGAGAACTAAT
GGACCTTACCTTAAGATGAAACCAGTGTGGCGGTCTTCATGCCAGCCAAAGAATGTCCAGAAGTGTATGCCAGTATAGTTT
CAACTCACAACGTTTCGCTGAGCTGTTGTCCACAAAATTCAGTACAGATATGAGGGCAAGATTACAACTACTTTCAAAAAAC
CTTGTCTCATGCTTCAAATCATGAAAGAGATGGCTCCATTGGTGCCTGGGCAAGTGAAGGGAATGAGTCTGGGAACAAAAT
GTTTAGGCGTGTAGCAAGAACCAGGCTGGCATCTC-
GCAAAGCTTCTGGGCAGAGCTGAATGTGGCTCGTCTATGCCATGAGAATGTGGTGCCTGTTGTAGCTGCCAGTACATGTGCCCC
TTCCAGCCAGGATAGTCTGGGCACCATCATCATGGAGATGCAAGGCAATACCACCTACATCATGTCATTTATGGGACTGGCTGT
GCACAGGGAATAGGAGAGGATGGTAGAGCTGGATGTGGGGGCGAGCCATTGAGCATAGTCCAGTCCCTCACCTATTCTGTGA
CATTGTGACTGGCTTACTTTTCTTCAATCAACAATGATTGTGCACCTGGACTTGAAGCCAGCTAACATATTCACTGAGCAG
GATGTCTGCAA

DIPLODACTYLINAE 000-000000(0 1)102000100013010000001000000003-00002---00110210011??1100010001-0311(0
1)00?-?11-100??-1?-0110000?(0 1)01100011100211000100?00011001220100?0001000100011?031100000000--00001010022320-
0000011010?000010-1111011000000000000000010(1 2)0-1001-1101010000000100001011110101(1 2)0100?0100200-1001101000311?
00?1-1(0 1)0000-0-----010?101000100????0000(1 2)1000000000?????00?00?00-
TACAGACTATAGATAAAGATGCTTTCTGTGTAAATCAAAGAGAAAATTGAAGCACATCAAGTAAAGTTGCAGCAGCTTGCCGCA
TATGTGGAGGTTTCATTTAAAATGATCTGTATAAGAGAAGCCACCCAGTACATGGACCAGTGGATAATGAAACACAGGCACCTC
TGAAGAAAAAGAAAAGAAAGAGACTTCTGGCCAGACACTTGTCAAGGTTTAAAGACTGATGTGAGAGGAGAGACATTGA
CACAATCCATCTACTAATTTTTGCCACAACCTGCTGGAAGTTATCCAGAGGAAAGTTCAGCAGTGCCCTGTGAAGTGTATTTT
CCAAGGAAAGGCACGATGGAGTGGCACCCCATCAAGGAGCTGTGATGTTTGTGGCACTTCTCCCATGGAGTGAAGAGAAA



CACAGAGTACAGATAAAGATGCCTTTTATGTAAACCGAACAGAAATTGAAGCACACCCAGTAAACTTGCAGCACCTCTGTGCGC
ATATGTGGTGGTTCGTTTAAAAATGATCCTTATAAAAGGACCCAGTACATGGCCAGTGGATGATGAAATGCAGGCCCTTC
TGAGAAAAAAGAAAAGAAAGGGCCACTTCTGGCCAGCTACTTAAACAAGGTTTTTAAAGATTGATGTAGAGGAGACATGGA
CACAATCCATCTACTAATTTTTGTCACAACTGCTGGAGTGTATCCAGAGGAAGTTCAGCAATGCCCATGTGAAGTGTATTTT
CCAAGGAAAAGGCACTATGGAGTGGCATCCCCATTCAATGAGCTGTGACATTTGTGGCACTTCTCCCATGGAGTAAAGAGAAA
GAAGCAAGCCCCAACCCACAGGTGAGCAAAAAGTCCAGGATCATTTGCTGAACGTGCGAGAAAGATAATGTATGCAAGAAGC
CGAAAAGCAAGTGAACAGCAAAAAGCATCATGAAAAAGATTACCAACTGCCAAAAGATCCATCTCAGTACGAAGATGCTCATAGT
AGACTATCCTGCAGATTTTGTAAAGTCAATCTCTTGGCAGATTTGTGAGCAIATTTCTGGCTGACCCAGTAGAAAACAATGCAAAA
CACTTATTTTGCAGACTTTGCATCCTTAAATGCCTCAAAGTAATAGGAAGTTATGCCCATCCTGTGCGTATCCTGTTTTCTACT
GATCTGGTGAACCCCTGTGAAGTCTCTTGTAGCATACTCAACACTTTGGCTGTGAGGTGTCCAGTGAAGAGACTGTTATGAGGAA
GTCATCTTGGAAAATACAGCCACCATTCTTCTAGTCACAAGGAGAAAAAAGACAAAAGGGACTTATGTGCATGAAAATAAAGG
GGGCCGACCAAGGCAACACTTACTTTTATTGACCCGGAGAGCCAAAAGCATCGCCTGAGAGAACTCAAGCTTCAAGTAAAA
GCTTTTGTGAGAAAGAAGAAGGTGGAGATGTGAAGTCTGTGTGCTAACTTTATTTCTGCTGGCTTTGAGATCTAGAATGAA
CACAGACAAGCTGACGAGTTGGAAGCTATGATGCAAGGGAAGGATCAGGACTTCCAGCTGTTTGTGGCAATCCGAGT
TAACACTTTTCTCAGCTGTAGCCAGTACCATAAAATGTATAGGACTATAAAAGCAATAACAGGAAGGCAGATTTCCAGCCACTG
CATGCACTCCGAACTGCTGAAAAGTCCCTTTTGGCAGGTATATCCATTGAAATGGAAAACCCTTGATAAATGTTTTCTAGTA
ACACAGAAGTAGGCATTATAGATGGACTTTCAGGCCATAACATTTAGTTGATGACTACCCAGTAGACACCATTGCAAAAAGAT
TTCGATATGATGCTGCCTTGGTGTCTGCCTTGTGATGATATGGAAGAAGACATCCTTGAAGGACTGAAATCTCATGATCTGGATGA
TTATTTGAAGGACTTCTCAGTGTGGTGTCAAAAGATCCTGTGATGGAATGGGAGATGTGAGTGAAGAGATGTGAGTGAAGAGTGGCC
AGCTTCCCTGAAAAGCTTAGATTCTCTTACAGTGCATGAACTCACCATAAGCTCATGGCAATGAAAATATAAGAATTTTT
GAAGAAAACAAGCCCAATTCAGAATTTGTGTGCAAAACCCTTATGCCTGATGCTTGTGATGAATCAGACCATGAGACATTCACT
GCTATCCTGAGTCTCTTGTAGCAGAAAAGAGAGGCCATGAAAAGCAGTGAACCTGGTACTTGTATGGGTGGAATCCCAAGAAC
CTTCAAATTCATCTTAAAGGGCACTGGATATGATGAAAAACTTGTCCGTGAAGTAGAGGGCCTTGAAGCTTCCGGCTTACATAT
ATTTGTACACTCTGTGATGCAACTCGTTGGAAGCGTCTCAGAACTTGGTCCAGCTCCATAAACAAGAGTCAAAAAGCAAAAC
CTGGAGCGGTATGAAGTGTGGAGGTCCAACCCCTATCATGAACTGTTGATGAACTACGTGACAGAGTAAAAGGGGTTTCTGC
CAAGCCTTTTATCGAGACTGTTCTTCCAGTAGATGCATTGCACTGTGACATTTGGCAATGCTGCTGAATTTATAAGATATTCAGT
TTGAGATTGGTGAAGTGTACAAAAATCCTGATGCATCAAAAAGAAAGAGGAAAGAGATGGCAGTCAACACTTGACAAAACACT
GAGGAAGAAAATGAACCTGAAGCAAGTAACAAGATGAATGAAATTTTGTAGAAAGGCTCATGTCAAAAAGAGACAGTAGAA
GCAGTATGTGAACATAAAGAGTGAAGGACCGAGATGAAGCACTCAGAGAACCTCATGGACCTTACCTTAAAGATGAAACCAGT
ATGGCGATCTTATGTCCAGCAAGGAGTGTCCAGAACTACTATGCCAGTACAGCTTCAACTCTAACGTTTTGCAGAGTTGCT
GTCCACAAAATTTAAGTACAGATATGAGGGCAAGATAACCAATTAATCCACAAAACCTTGTGCTATGGCCAGAAAATCATAGA
AAGAGATGGTCTATTGGTGTCTGGGCAAGTGAAGGAAATGAGCTGGAAACAATTTTAGGCGTGCAGTAAGAACAGATTT
AGCTACAGCTGAGAAAGTCTGGGCAAGTAAACAGTGCACGCTTGTATGATCAAAAATGTTGGTGTGTAATGCTGATGAC
ATGTTCCCTGCTGGTCAAGACAATTTGGGGACCATAATAATGGAATATGTAGGTAACAGCACTCTGCATCATGTTATCTATGGGA
CTAACTGGGTAACAGTCAAAAAGGAAGGATGATGGCCTTGGATGTGGCCAAGAGTCTTAAAGCCTTGTCTCAGTCTCTGCACACT
CCCGTGACATTTGTGACAGGTTTGTCTTCTCCATTACAGTCAAGTTGTGCACCTGGATTTAAAACCTGCTAATATATTCATCACT
GAACAAAATATTTGCAA

PYGOPODIDAE 001000000011010001001130(0 1)0-00000100000003-00002-----1100100110-1100010-00-03?010001011-
10001-1--01100001001101111002110001000000110010200000210010000000110031100000000--030??010122020-0010011010-000000-
110101000000000000000000??12001021-??0001001000001001010100-0031--0-0-4-----1--1001--1100?2-110100-0----010?10?
000000????-00210001000000????1?00?10?00-

CACAGACTATAGATAAAGATGCCTTTTGTGCAAAATCAAAGAGAAATTGAAGCACACCAAGTAAACCTGCAGCAGCTCTGTGCGC
ATATGCGGAGGATCATTTAAAATGATCCTTATAAGAGAAGCCACCCAGTACATGGACCAGTGGATGATGAAACACAGGCCACTT
CTGAGGAAAAAAGAAAAGAAAGGCCACTTCTGGCCAGACCTACTTGTCAAAGGTTTTTAAAATGATGTGAGAGGAGACATTGA
CACAATCCATCTACTAATTTTTGTCACAACTGCTGGAAAGTATTTCAGAGGAAAGTTCAGCAGTGTCCCTGTGAAAGTGTATTT
CCAAGAAAAGGGCACTATGGAGTGGCACCACATTCAAGCGAGTTGTGATGTTTGTGGTACTTCTCTCGTGAAGTAAAGAGAAA
GAAACAAGCCCTCAATCCCCGGTGTGCAAAAAGTCCAGGGTCAATGCAGAACATGCTAGGAAGATAATGTACACAAGAAGCC
AGAAGCCAGTGAACAGCAAAAAGCCTCATGAAAAGATTACCAACTGCAAAAAGATTACCTCAGTACGGATATGTCTACAGTA
GACTATCCTGCAGATTTTGTAAAATCAATCTCTTGGCAGATCTGTGAGCATACTTGGCAGATCCAGTAGAAAACACTACATGCAAGC
ACTTATTCTGTAGACTCTTAAATCCTTAAATGCCTCAAAGTAGTAGGCATGATGTCATCTTGTCCATCCTGTGCTGCTTCTCTACT
GATCTGATGAATCCAGTGTGATCCTTCTCAATGTGATCAACACTTTGGCTGTGAGGTGCCAGTGAAGAGACTGTGATGAGGAC
GTTGCTCTGGGAAAATACAGCCATCATTTCTAGCCACAAGGATAACAAAAGAGAAAAGGGACCTACGTGCATGAAAACAAAAGG
TGGCCGACAAAGGCAACTTACTTTCCCTGACCCGAAAGAGCTCAAAGCATCGGCTGAGAGAACTCAAGCTTCAAGTAAAA
GCTTTTCTGAGAAAAGAAAGGTGGAGATGTGAAGTCTGTATGCTTAACTTATTCTGCTTGGCTGAGAGTGAAGATGAA
CATAGACAAGCTGATGAATTTGGAAGCTATGATGCAAGGGAAGGGTCAAGACTGAGTCCAGCTGTTTGTGCTTGGCAATTCGAGT
AAACACTTTTCTCAGCTGTAGTACATACATAAAATGTATAGGACTATAAAAGCAATAACAGGAAGGCAGATTTCCAGCCATTG
CATGCTCTCCGAAGTGTGAAAAGTCCCTTTTGGCAGGTTATCATCATTGAAATGGAAAACCCCTTGAAAAATGTGTCCAGTA
ACACAGAAGTAGGCAATTATAGATGGACTTTCAGGCCATACAGAAATTTGGTTGATGACTACCCAGTAGACACCATTTGCAAAAACGAT
TTCGATATGATTCCGCCTTGGTGTCTGCCTTGTGATGATGGAAGAAGACATCCTTGAAGGACTTAAATCACATGATCTAGATGAT
TATTTGAAAGGACCATTCACTGTGGTGTGATCAAAGATCCTGTGATGGAATGGGAGATGTGAGTGAAGAGCATGGCTGTGGCCC
AGCGGTCCCTGAAAAGCAGTTCGATTCTTTTACACTCATGAACTTACTGTGGCTCATGGCAATGAAAATGTAAGGATTTTT
GAAGAAAATAAACCTAATTCAGAGCTGTGTTGTAACCTTGTGACCTTATGCTGTGATGAATCAGACCATGAGACCTTCACT
GCTATCCTGATCCTCTGGTAGCAGAAAAGAGAGGCCATGAAAAACAGTGAACCTGGTACTTGTATGGGTGGTATCCCAAGAAA
CTTCAAATTCATCTTCAAGGGCACCGGATATGATGAAAAGCTTGTCCGTGAAGTAGAGGGCCTTGAAGCTTCAAGCTTACATA
TATTTGTACACTCTGTGATGCAACTCGCTTGGAAAGCTTCCAGAACTGTATCTTGCACCTCATAAACAAGAAAGTACCGCTGAAAA
CCAGGAGCGGTATGAAGTGTGGAGGTCCAACCTTATCAGAACTGTGATGAACTACGTGACAGAGTAAAGGGTGTGTTCTG
CCAAGCCTTTTATCGAGACTGTGCCTTCAGTAGATGCATGCACTGTGACATTTGGCAATGCTGTAATTTACAAGATATTCAT
GTTTGTGAGATTGGCGAGGTATACAAAATCCAGATGCATCAAAGAAGAGAGAAAAGAGATGGCAGTCAACACTTGACAAAACAC
CTCAGGAAGAAAAGTGAACCTTGAAGCCTGTAACAAGGATGAATGAAAATTTGTAGAAAGGCTTATGTCAAAAAGGGACAGTAGA
AGCTGTTTGTGAACCTGTGAAATGTGAGGAGAGATGCGAAGCCCTCAGAGAACCTATGGCCCTTACCTTAAAGATGAAACCAG
TATGGCGATCTTCTGAGCAAGCAAGGAGTGGCAGACTGCTCAGTACAGCTTCAACTGCAACTGCAACTGCAACTGCAACTGCAACTG
TATCCACAAAATTCAGTACAGATATGAGGGCAAGATAACAAATTAATCTCCACAAGACTCTTGTCTCATGTGCCAGAAAATATAGA
AAGAGATGGTCTATTTGGTGTCTGGGCAAGTGAAGGAAATGAGTCTGGAACAAAACCTATTAGACG-----
GTAAGAACAGTATTAGCATCACGGCAGAGCTTCTGGGCAGAAATGAAATGTGGCAGGCTTGTATCAAAAACCTGGTGGTGTGTA
GTAGCTAGCAGCATGGTCCCTGTAGTACAGCAAGTGTGGGCAAGTATAAATAAGGAAATGTGCGTAAATAGCATTTCACC
ATGTTATCTATGGGACTGACTGTGTAACAGCTAAAGGGAAGGATGATGGTCTTGGAGGTGGCCGAGAGTCTTAAAGCATGCCTC
AGTCTCTGAGCTATCTGTGACATTGTGGCAGGCTTAGCCTTCTCCATTCCCAATTAATGTGCACCTGGATTTAAAACCTGCC

AACATATTCATCACCGAACAAAATATTTGC--

Xenosaurus 0000011111101000000113000000010000001010000001100111021000-0-0100010010-101010?100100100-1100100010001001100010101211000001000000000200100100(0 1)100000100000112000010001103001-100001110000012010000000-10010103000000010000011012001121-(0 1)0002101000002000000011000010000(0 1)01000000000201000(0 1)1000001-1000010000010000221100101?????0000?00001010110000?100?00?00?00-TGCAGGCAATAAAGGACGTCCTTCATACGAACTATAGAGAGACTAAAGCTCATCAAGCAAACCTACAGCACCTTTGCCGCACTGCGGTGGCTCATTAAAACCGACCCTTACAAGAGAAGCCACCCTGTCATGGGCCAGTGGATGATGAGACACAGGCCCTTCTGAGAAAAGAGGAGAAAAGAGCCACGTCCTGGCCAGATCTTCTCGGCAAAAGTTTTTAAAGATTGATGTGAGAGGAGACATTGATACAAATCCACCCTACTCATTTTTGGCCACAATTGTTGGAATGTGGTTCAAAGGAAATCCAGCCACTCCCGTGTGAAGTGTATTCCCAAGGAATGGCACAATGGAGTGGCATCCCCATTATCGAATTGTGACGTTTGGCGCACTTCTTCCGTGGGGTCAAGAGAAA GAAGCAAGCCTGAATCCACAATTGAGCAAAAAGCTCCGGATCCGGTGCGGGACGTGTAGAAAAATAAGGCATGTGAGGAAC ATGAGACAAGTGAACCAGAAGAGTTTGTATGAAAAAGATTGCCAACTGCAAGAAGATCCATCTCAGTACCAAGATCCTTGCAGT AGACTACCCTGCAGACTTTGTAAAGTCAATCTCTTGCCAGGTCTGTGAGCACATCTGTCTGACCCGGTAGAAACGACGTGCA AGCACTTATTCTGCAGAGTTTGCATCCTTAAATGCCTCAAAGTAATGGGGAGCTATTGCCCATCTGTGCTACCCCTGCTTCC AACTGATCTGGAGAGCCCTGTGAAATCCTTCTGAGCATCTCAACAGTTTGGCGGTGCGATGTCAGTGAAGATTGTCTTGA AGAGGTCTCTGGGAAAATACTGCCACCATCTTCTCAGCCACAAGAGGTGTAAGAGCAAAAGAGGGTACTGTAAGAAAAGCATAACA AAGGTGGCCGGCAAGACAACACTTACTCTACTGACCCGGAGAGCTCAAAGCACCCTAAGAGAACTCAAGCATCAAGT GAAAGCTTTTGTGAGAAAAGAAAGAAAGAGAGATGTGAAGTCTGTGTCTGACCTGTTTCTACTGGCTCTGAGAGCTAGAA ATGAACACAGACAAGCTGATGAGTTGGAAGCTATAATGCAAGGAAAGGATCAGGACTTCATCCAGCTGTTTGTGTTGGCAATCC TGACCAACACTTTTGAAGAGTCCACTGACCTACCATAAAATGAAAGAGTCCGTGTAAGAGCAAAAGAGGGTACTGTAAGAAAAGCATAACAGGATGTTCCAGC CATTGCATGCTCTCCGAACATCTGAAAAGTCCCTCTACCAGTTACCATCCATTGAGTGGAAAACCACCCTTGA AAAATGTGT CCAGTAAACACAGAGGTAGGATTATCGATGGGCTCTCAGGGATACACATTTGGCTGTATGACTACCCAGTAGAAAACGATTGCAA AGAGATTTGATATGATGCAGCTTTGGTTTCTTCCCTAATGGATATGGAAGAAGACATCTAGAAAGGGCTGAAAACCTCAGAACT CCCAGACTATTGAAAGTCCACTGTGGTGAATGAAAGAGTCCGTGTAAGAGCAAAAGAGGGTACTGTAAGAAAAGCATAACAGGAG GCGGCCCGGCTGTCCCGAGAAAAGCAGTTGATTCTCTTTACCCTCATGAGCATCACTGTCACTCATGACAACGGGAGCACA AAGGTTTTTGAAGAAACCAAGCCCAATTGAGGCTTTGTTGCAAACCTTTATGCCTCATGCTAGCTGATGAATCGGACCATGAG ACACTCACGACCATTCTGAGCCCTTGTAGCAGAAAAGAGAGGCCATGAAGAGCAGCGTACTGATACTGGATATGGCTGGAATC CCCAGAATGTTCAAATTCATCTCAGGGCCACTGGATATGATGAAAAGTGTCCGTGAAGTAGAGGGCTGGAAGGAGCAGTGGC TCTACTTACATTTGACACTTTTGGATGCGACGCTGTGAAAGCCTCTCAGAACTTGATTCTTACTCCCAACAGGAGCATATA CTGAAAACCTGGAACGGTATGAGGTGTGGAGGTCCAACCCCTACCACGAGACTGTTGATGAACTACGTGACAGGGTGAAGGG TGTTTCTGCCAAGCCTTTATCGAGACTGTACATCGATAGATGCATTGCACTGTGACATTGGCAATGCGGCTGAGTTTACAAG ATATCCAGTTTGTAGATTGGCGAAGTGTACAAAAACCTGACGCGTCAAAGAGGAGAGAAAAGAGATGGCAGTCAACTCTTGA CAAACACCTCAGAAAAGAAGATGAACCTGAACCTGTAACAGAGTGAATGGAATTTTGTAGAAAAGTCAAGCAGTGAAGGAG ACTGTGGAAGCAGTTTGTGAACTAATCAAGTGTGAGGAGAGGCAGGAAAACCTCAGAGAACTCATGGACCTTTACCTTAAGAT GAAACCAGTATGGCGGCTTTCATGTCCACCAAGGAATGCCAGAACTGGTATGCCAGTACAGTTTCAAACCTCTCAACGTTTTGC AGAGTTGCTTTCCACAAAAGTTTCAAGTACAGATACGATGGCAAGATTACTAATTTTACAAAACCTTGTCTCATGTTCCGGAA ATATAGAAAAGAGATGGCTTCTGTTGCTTGGGCAAGTGAAGGAAATGAGTCTGGGAACAACTGTTTAGCGGTGACAGTAAA AATCGTTTGGCATCAAGGCAGAGCTTCTGGGCAGAACTAAATGTGGCACGCTTGACCATAACAATGTGGTGCATGTAGTAGCT GCCAGCATGTGCCCTGCCAATCAGGATTGTTGGGCACCATAATAATGGAATATGTAGGTAACAGCACTCTGCACCATGCTA TCTATGGGACTGGCAGTATGACAGCAAAAAGGAAGGA---

Eosaniwa 001?01111?0?001000?????1???0100?0?10?000100?1??0?21000-0-??0? 1?????????????????????????????????????????01?0011110?111?????0?00?0?0?????????????0?00?00?0?000?1000?1--??-10000?2?001? 0111?1?000?00-101?021200000002?000???12102??1-??0?1101?????1?????????????????????00?0?0?????????????0?1-??1?10?? 001?????????????????????????????????????????00?00?? 00?-----

Shinisaurus 0011001111101000000011000-00001010001(0 1)1100000000(0 1)01011020000-0- 0100110011010000011000011000110011000100110001010100201001000000000021-1(0 1)010011000001000001120000000001(0 1)11000010110100000000-0001010200001000101000110120010(1 2)1- 1100110100000000000001100001010000100001000010100021000021-100001000001000221100?????00?0?0000100?0100?????? 00?00?00- TGCAGGCAATAAATAAAAATGTCTTTCACATGAATTACAGAGAGACTGAAGCTCATCAGGCAAACCTACAGCACCTCTGCCGCA CTGCGGTGGCTCATTAAAACCTGACCCTTACAAGAGAAGCCACCCTGTCATGGGCCAGTGGATGATAAGACACAGGCTCTTC TGAGAAAAGAAAGAGAGAAGGGCCACATCTGGCCAGATCTTCTTGCCAAGGTTTTTAAAGATTGATGTGAGAGGAGACATTGAC ACAATCCACCCTACTCACTTTTGGCCACAATTGTTGGAATGTGGTTCAAAGGAAGTTTCAGCAATCCCCATGTGAAGTGTATCTTC CAAGGAATGGCACAATGGAGTGGCATCCCCATTATCCAGCTGTGATGTTTGTGGCACTTCTTCCGTGGGGTCAAGAGAAAAG AAGCAAGCCCTGAATCCACAGTTGAGCAAAAAGCTGAGGATCGTTGCGGGACATGCTAGAAAAATAAGGTTGTGTGAGGAATAT GAAACAAGTGAACAACAAGACTTAAATGAAAAAGATTGCCAGCTGCAAGAAGATCCATCTCAGTACCAAGATCCTTGCAATAG ACTATCCTGCAGACTTTGTAAAGTCAATCTCTTGCCAGGTCTGTGAGCACATCTGTCTGACCCAGTAGAAACGACGTGCAAC

ACTTATTCTGCAGGATCTGCATCCTTAAATGTCTCAAAGTAATGGGGAGCTACTGCCCATCCTGTGCGTATCCTTGCTTCTACT
GATCTGGAGAGCCCTGTGAAATCCTTCTGAGTATCCTCAATGGTTTAGCTGTGAGATGTCAGTGAAGATTGTGCATGAGGAG
GTCTCTTGGGAAAATACTGCCCCATCTTTCCAGCCACAAAAGAGGTAGAAGACAAAAGAGGGCTATGTGCATGTCAACAAAAG
TGGCCGACCAAGACAACACTTACTCTACTGACCCGAAGAGCTCAAAAAGCACCAGCTAAGAGAAGTCAAGCTTCAAGTAAAA
GCTTTTGCTGAGAAAAGAAGGGGGAGATATAAAGTCTGTGTGTCTAACCTTTGTTCTACTGGCTCTGAGAGCTAGAAAATGAA
CACAGACAAGCTGATGAGTTGGAAGCCATAATGCAAGGGAAAGGATCAGGCCTTCATCCAGCTGTTTGCTTGGCAATCCGAGT
CAACACCTTTCTCAGCTGTAGCCAAATACCATAAAATGTACAGGACTGTAAAAGCGATAACAGGAACAGATTTCAGCCATT
GCATGCTCTCCGAACATCTGAAAAGTCCCTCCTGCCAGGTTACCATTTCATTTGAGTGGAAACCACCTTGAAAAACGTGTCCAG
TAACACAGAGGTTAGGCATTATTAATGGGCTCTCAGGGATACAACATTTGGCTGTGACTACCCAGTAGATACGATTGCGAAGAG
ATTTGCATATGATGCAGCTTTGGTTTCTGCCCTGATGGATATGGAAGAAGACATCTAGAAGGGGTGAAAACTCAGGACTTGG
TGACTATTTGAAAGGCCCTTACTGTGGTGATTAAGAGTCCCTGTGTGGAATGGGGATGTTAGTGAAGAAGCATGGCTGTGG
GCCAGCTGTCCCTGAGAAAAGCAGTTTCGATTCTTTTACCCTCATGAGCATCACTGTTGCTCATGACAATGGGAGTGCAAGAT
TTTTGAAGAAAACCAAGCCCAATTCAGAGCTTTGTTGCAAACTCTGTGCCTTATGCTGGCTGATGAATCAGACCATGAAACACT
CACGGCCATACTGAGCCCTTGTAGCAGAAAAGAGAGGCCATGAAGAGCAGTGTGTTGATACTGGATATGGCTGGAATCCCA
GAATGTTCAAATTCATCTTCAAGGGCACTGGATATGATGAGAAGCTTGTCCGTGGAGTAGAGGGCTGGAAGCTTCTGGCTCA
CTTACATTTGTACACTTTGTGTGCAACACGCTGGAAGCCTTTCAGAATTTGGTCCCTTCACTCCATAACAAGGATCATGTGA
AAACTTGAACGGTATGAGGTGTGGAGGTCCAACCCCTACCAGAGACTGTTGATGAACTACGTGACAGAGTGAAGGGTGT
CTTCCAAGCCTTTATTGAGACTGTTCCATCGATAGATGCATTGCACTGTGACATTTGGCAATGCAGCTGAGTTTACAAGATATC
CAGTTTGAGATTGGTGAAGTGTACAAAAACCTAATGCATCAAAAAGAAGAGAGAAAAGAGGTGGCAGTCAACTTTGACAAAAC
ACCTCAGAAAAGAAGATGAACCTGAAGCCTATAACAAGGATGAATGGAATTTGCCAGAAAAGTCAAGCAGAAAGGAGACTGTG
GAAGCAGTTTGTGAACATAAGTGTGAGGAGAGGCATGAAGCCCTCAGAGAAGTCAAGGACCTTACCTTAAAGATGAAACC
AGTATGGCGGTCTTCATGTCCACCAAGGAATGCCAGAACTAGTCTGCCAGTACAGTTTCAACTCTCAACGTTTTGCAGAGTT
GCTGTCCACAAAAGTTCAAGTACAGATATGATGGCAAGATTACCAATTAATTTACAAAACCTTTGCTCATGTTCCGGAAATATA
GAAAGAGATGGCTCCATTGGTGGTCTTGGGCAAGTGAAGGAAATGAGTCTGGGAATAAAGTGTAGGCGTGCAGTAAGAATCGT
TTGGCATCAAGGCAGAGCTTCTGGGCAGAACTAAATGTGACACGCCTTGACCATAACAATGTGGTGCCTGTAGTAGCTGCCAG
CACATGTGCCCTGCCAATCAGGATAGTCTGGGCACCATAATAATGGAATATGTAGGTAACATCACTCTGCACCATGTTATCTATG
GGACTGGTGGTACGACAGCAAAAAGGAAGGATGATGGGCTTGGATCTGGCCATGTGTGTTTGAGCATAGCTCAGGCTCTGGGC
TACTCTGTGACATTTGGCAGGCTTAGTCTTTCTCCATTACAGTTGATTGTGCATCTGGATTAAAACCTGCTAACATATTTCAT
CACAGAACAAAATGTTTGCAA

"Saniwa" feisti00????0011????010????????01????0000????10????00100001?110200????1????1001?0?0?000?0000011???????
0??1????????????????????????????????????????????????????????????????????????????????????????00?????????01?0?????????????????????????0-000??120?00?
100??000??12?1?121-?????01000002??00??01????0????????00?00?00?00?0000?1?????1-1001?1?1??
001?????????????????????????????????????????????????????????????????????????????????????????0??????
00-----

HELODERMATIDAE 001-001111110100000(0 1)00300100000010002010100000000101-1000000110-0100010010-
13000110-010100001-1--0110000101110110111(1 2)10000201001000000021-100100110000010000010200000000110000000001120-
00110001110001000-100101120200110120100010012101121-000011010000020100000010010010-10-020000000001101000010000?1-
1000010101200000231101010001?00111?000?101011100?0??00?00??
000CACAGGCAATAAATAAGGGTGTCTTTCATATGAACTATAGAGAGACTGAAGCTCATCAAGCAAACCTACAGCATCTTTGCCG
CATCTGCGGTGGCTCAATTAATAACTGACCCCTTACAAGAGAAGCCACCCTGTTATGGGCTGTGGATGATGAGACACAGGCTCT
TCTGAGAAAAGAAAGAGAGAGGGCCACGTCTGGCCAGATCTTCTTGCCAAAAGTGTAAAGATTGATGTGAGAGGAGACATGG
ACACAATCCATCTACTCATTTTTGCCACAATTTGGAATGTGGTTCAAAGGAAATTCAGCAGTTCCCAATATGGAGTGTCTTT
CCCAAGGAACAGCAGATGGAGTGGCGTCCCAATTCGTCAGCTGTGACATCTGCGGCAGTTCTTCCGTGGGGTCAAGAGGA
AGAAGCAATCCCTGGATCCACAGCTGAGCAAAAAGTCCGAGTCAATGCGGGGGCTGCCAGAAAATAAGGCATGTGAGAAA
TATGAGCAAAGTGAACCAAGAGTTTAATGAAAAGATTGCCAACTGCAAGAAGATCCATCAGTACCAAGATGCTTGCAG
TAGACTATCCTGCAGACTTTGTAAAAGTCCATCTTGGCCAGGCTGTGAGCACATCCTGTCTGACCCCGTCAAGAACGACATGCA
AGCACTTGTCTGCAGAGTCTGCATCCTTAAATGCCTCAAGGTCAATGGGGAGCTATTGCCATCCTGTGCTTATCCTTGCTTCT
ACTGATCTGGAGAGCCCTGTGAAATCCTTCTGAGCATCTTCAACAATTTGGCTGTGCGATGCTCTGCACAAGACTGTCATCAG
GAGGTCTCTTTGGGAAAATACTGCCCCATCTTTCCAGCCACAAAAGTGGTGAAGACAAGAGGGCTATGTGTACGTCAACAA
AGGTGGACGACCAAGCAACACTTACTTTCCGCTTACCAGGAGACTCAGAAGCACCCGCTAAGAGCAACCTCAAGCAATGTA
AAAGCATTGCTGAGAAAAGAAGAGGGGGAGATGTCAAGTCTGTGTGTCTGACTTTGTTCTTACTGGCTCTGAGAGCTAGAAA
TGAACACAGGCAAGCTGATGAGTTGGAAGCTATAATGCAAGGGAAAAGGATCAGGCCTTACCCAGCTGTTTGTGTTGGCAATTC
GAGTCAACACTTTTCTCAGCTGTAGCCAATACCATAAAATGTACAGGACTGTAAAAGCAATAACAGGAAGACAGATTTCCAGC
CACTGATGCTTCCGACCTTGAAGAAAGTCCCTTACCAGGTTACCATCCATTTGAGTGGAAAGCCACCCTTGAAAAATGTTG
CCAGTAAACAGGGGTGGGCATTATCGACGGGCTGTCAGGGATAACAACATCTGGCTGATGACTACCCAGTAGACACGATTGCG
AAGAGATTCGATATGATGCAGCTTTGGTTTCTGCCCTAAAAGGATATGGAAGAAGACATCTAGAAGGGCTGAAAACTCAGGAC
TTAGATGACTATTTGAAAGGCCCTTCACTGTGGTGTATTAAGAGTCTGCGATGGAATGGGGATGTTAGCGAAAAAGCATGGC
TGTGGCCGCTTCCGACCAAGCAAGTCCCTTACCAGTCTTACCAGTCTGATGACATCACTGTCAACATGCAATGCAATGGGATGCA
AAGATTTTGAAGAAACCAAGCCTAATTCGGAGCTTTGTTGCAAACTTTGTGCCTTATGCTGGCTGATGAATCAGATCATGAG
ACACTCAGGCCATCTGAGTCCCTTGTAGCAGAAAAGAGAGGCCATGAAGAGCAGTATATTGATATGGATATGGCTGGAATC



CCCAGAAATGTTCAAATTCATTTTAGGGGCACTGGGTATGATGAAAAGCTTGTCCGTGAAGTAGAGGGCCTGGAAGCCTCTGGC
TCTACTTACATTTGTACACTTTGTGATGCGACGCGCTGGAAGCCTCAGAACTTGATCCTTCACTCCATAACGAGAAGTCAATG
CTGAAAACCTGGAAGCGTATGAGGTGTGGCGTGTCCAACCCCTACCACGAGACTGTTGATGAACTACGCTGACAGATGTAAGATG
TGTTTCCGCCAAGCCTTTTATCGAGACTGTTCATCAATAGATGCATTGCACTGTGACATTGGCAATGCAGCTGAGTTTACAAG
ATATTCCAATTTGAGATTGGTGAAGGTGACAAAAACCTGATGCGCCAAAAGAAGAGAGAAAAGAGGTGGCAGTCAGCTCTTGA
CAAACACCTCAGAAAAGAGATGAACCTGAAGCCTGTAACAAGGATGAATGGAATTTTGTAGAAAAGCTCATGACCAAGGAG
ACTGTGGAAAGCAGTTTGTGAACATAATCAAGTGTGAGGAGAGCCATGAATCCCTCAGAGAACTCAGCACTTATCTTAAGATG
AAACCAGTATGGCGGTCTTCATGTCCACCAAGGAATGCCAGAACTGGTATGCCAGTACAGTTTCAACTCTCAACGTTTTGCA
GAGTTGCTGTCCACAAAGTTCAGGTACCGATATGATGGCAAGATTACCAATTAATTTTACAAAACCTTGTGCTCATGTTCCGGAAA
TTATAGAAAAGAGATGGCTCCATTGGTGTCTGGGCAAGTGAAGGAAATGAGTCTGGGAACAACTGTTTAGACGTGCAGTAAGA
ATCGTTTGGCATCAAGGCAGAGCTTCTGGGCAGAACTAATGTGGCACGCCTTGACCATAACAATGTGGTGCATGATGATAGCTG
CCAGCACATGTGCTCCTGCCAATCAGGATAGTTTGGGCACCATAATAATGGAATATGTAGGGAAACAGCAGCTGCATCAGGTTAT
CTATGAACTGGCAATATGGCAGCAAAAAGGAAGGATGATGTTTGGATGTGGCCATGCGTGTGAGCATAGCTCATGCTCT
GGGCTACTCTCGTCAATGTGGCAGGCTTAGTCTTCTCCATTACAGTTGATTGTGCATCTGGATTTAAAACCTGCTAACATAT
TCATCACAGAACAATGTTGCAA

Lanthanotus 001-0100001101000101012001?11?1110001-0010100011000101001000100-010001001?013000001-
000110001-1--01110001001111101011100001010000000002001100001101010100000112000000001?01000000001120-
00110101110001000-100101120200110020100011012012121-0102(1 2)1010000021100000011(0
1)10030200002000000001101000210000?1-10000101001010002411101?10001?11101?000120011?1?0?00?00?00??
000TGGCGCAATAAATAAAGACATCTTACAGGAGCTATAAAGAGACGGAAGCTCATCAAGCAAACCTGCAGCACCTCTGCC
GCATCTGTGGTGGTTTCGTTTAAAACTGACCCTTGCAAAAAGAAGCCACCCTGTTTCATGGGCCGGTGGATGATGAGATGCAGGCC
TTCTGAGAAAAGAGAGAGAGAGGGGCCACGTCGTGGCCAGAACTTCTCGCCAAAGTGTAAAGATTGACGTGAGAGGAGACAT
CGACACAATCCACCCCACTCACTTTGCCACAATTTGCTGGAATGTGGTTCAAAGGAAATTCAGCAATTTCCCATGTGAAGTGA
TTTTCCAAAGGAATAAAGGAGTGGATGGCATCCACTCATGCTGTGATGTTCTGCAGCACTTCTTCAAGCAAG
AAAAAAGCCAGCCCTGAATCCACAGTTGAGCAAAAAGCTCAAGAACCTTGACAGGGCATGCTAGAAAAATAAGCGGTGTGAAA
AATATAAAACCAGTGAACCACC---
CTTTAATGAAGAAGATTGCCAAGCTGCAGCAGGATCCACCTCAGTACCAAGAACCTTGCACTAGACTATCCTACAGACTTTGTAA
AGTCAATCTTGTCCACGTGTGAGCATATCCTGTCTGACCCAGTAGAAAACGACATGCAAAACACTTATTTCTGCAGGGTCTGCAT
TCTTAAATGTCTCAAAGTAATGGGGAGCTACTGCCCATCTGTGCTATCCTTGTCTTCCGACTGATCTGGAGAGCCCTGTGAAA
TCCTTTCTGAATATCCTCAATGGTTTGGCTGTGAGATGCCAGTGAAGAATGTCATGAGGAGGTCTCTCTGGGAAGTACTGC
CACCATCTTCTAGCCACAAAGCGGTAGAAGACAAAGAGGGGTATGTGATGTAACAAAGGTGGCCGACCAAGACAACACTT
ACTCTCACTGACCCGGAGAGCTCAAAAAGCATCGCTAAGAGAACTCAAAGTCAAGTAAAAGCTTTTGTGAGAAAAGAAAG
GGGGCTTGTGAAAAGTCCGTGTCTAACTTTGTTCTACTGAGTCTGAGAGCGAGAAATGAACACAGGCAAGCTGATGAGTT
GGAAGCTATAATGCAAGGAAAGGATCTGGCCTTCATCCCGCTGTTTGTGGCAATCCGAGTCAACACCTTTCTCAGCTGTAG
CCAATACCATAAAAATGACAGGACTGTAAGAAGCACTAACAGGCAGACAGATTTCCAGCCATTGCATGCTCTCGAACATCTGA
AAAGTCCCTTCTGCCAGGCTATCATCTTTCGAGTGGAAACACCCGTTGAAAAATGTGTCCAGTAATACAGATGATAGGCATTAT
GATGGGCTTTCAGGGATGACAGCTTGGCTGATGACTACCCAATAGACATAGACAAAGAGATTTCCGATATGATGCAGCTTTGG
TTTCTGCCCTAATGGATATGGAAGAAGACATCCTAGAAGGGCTGAAAATCCAGGACTTGGATGACTATTTAAAAGGGCCTTTCA
CTGTGGTGTATTAAGAATCCTGTGATGGAATGGGGATGTTAGTGAAGAAGCATGGCTGTGGCCAGCGGTCCCTGAGAAAAGCA
GTTCCGGTCTCTTTACCCCTCATGAGCATCACTATCTCATGACAAATGGGAGCACAAGATTTTTGAAGAAAACCAAGCCCAATT
CAGAACTTTGTGCAAACTTTGTGCTTATGCTGGCTGATGAATCAGACATGAGACATTCAGCCATTCAGCCCTTGTGT
AGCAGAAAAGAGAGGCCATGAAGAATAGTGTATTGATACTGGATATGGCTGGAATCCCAGAAATGTTCAAATTCATCTTCAAGG
CACTGGATATGATGAAAAGCTTGTCCGTGAAGTAGAGGGCCTGGAAGCCTTGGCTCCACTTACATTGTACACTTTGTGATGC
AACACGCTGGAAGCCTCTCAGAATTTGATCTTCACTCCATAACAAGGAATCATACTGAAAACCTTGAAGCCGATGAGGGTGTG
GAGGTCAAACCCCTACCATGAGACTGTGATGAACACTGACAGTGAAGGGTGTCTTCCGCAAACTTTTATGAGACTGT
ACCATCAATAGATGCATTGCACTGTGACATTGGCAATGCAGCTGAGTTTTACAAGATATTCCAGTTTGTGAGATTGGTGAAGTGTAC
AAAAATCCTGATGCATCAAAAAGAAGAGAGAAAAGAGGTGGCGGTCCACTTTGACAAAACCTCAGAAAAGAAGATGAATCTAA
AACCTGTAACAAGGATGAATGGAATTTTGTAGAAAAGCTTATGACGAAAGGAGACCGTGAAGCAGTGTGTAACATAATTAGG
TGTGAGGAGAGGCAAGAAGCTCTCAGAGAACTCATGGCCCTTACCTTAAGATGAAAACAGTATGGAGGTCTTTCATGTCCCA
CAAAGAATGGCAGAGCTGTGTCAGTACAGTTTCAATCTCAACGTTTTGCAAGTGTGCTGCCACAAAGTGAAGTGAAGTGA
GATATGATGGCAAGATTACCAATTTTCCACAAAACCTTGTCTCATGTTCCAGAAAATTATAGAGAGAGATGGCTCCATTGGTGC
TTGGCAAGTGAAGGAAATGAGTCTGGGAACAAACTGTTTAGGCGTGCAGTAAGAATCGCTTGGCATCAAGGCAGAGCTTCTG
GGCAGAACTAAATGTGACACGCTTGACCATAACAATGTGGTGTGCTGTAGTAGTGTGCCAGCATGTGCCCTGCCAATCAGGA
TAGTTTGGCCACCATAAATAAGTGAATGTAGTAAACAGCACTGACACCTGTTATCTATGAGGACTGCCAATGAGCAAGAAA
AGTAAAGATGATGGGCTTGGATATGGCCATGTGCATTGAGCACAGCTCAGGCTSTGGGCTATGCCTGTGACATCATGGCAGGAT
TAGTCTTCTCCATTACACCTGATTGTGCATCTGGATTTAAAACCTGCCAATATTTCATCACAGAACAATGTTTGGCAA

VARANIDAE 010001100112000011010130010100101000-?0111100110011-
10020001100010011001101000001000001100011021001100-10110110010121000010101000000002001?
01000101010100000112000000001101000000001120-0001010011?001000-1001011202001100201000110120?2021-
011221010000021100100011100020000?0200000-1001100000010000?1-1000010100?00000-4111010101??21101?0011121?11112??????
00?(0 1)(0 1)??
000TGGCGCAATAAATAAAGACGTCTTACAGCAGCTATAAAGAGATGGAAACTCATCAAGCAAACCTGCAGCACCTCTGCC
GCATTTGCGGTGGTTTCATTTAAAACTGACCCTTGCAAGAGAAGCCACCCTGTTTCATGGGCCGGTGGATGAGGAGATGCAGGGC
CTTCTGAGAAAAGAGAGAGAGAAAAGGCCACGTCGTGGCCAGAACTTCTACCAAGGTGTTAAGATTGATGTGAGAGGAGACA
TCGACACGATCCACCCCACTCACTTTTGGCACAATTTGTTGGAATGTGGTTCAAAGGAAAGTTCAGCAATTCCTGTGTGAAGTGT
ATTTTCCGAGGAATGATAACAATGGAGTGGCATCCACATTCAGCAACTGTGATGTTGTAGCACTTCTTCCATGGGGTCAAGAG
AAAAAAGCAAAGGCTGAATCCACAGTTGAGCAAAAAGCTCAAGAACACGACAGGGCATGCTAGCAAAAATAAGGCACATGAG
AACTATGAAACCAGTGAACAACAAGAGCTTAATGAAGAAGATTGCCAACTGCAGCAAGATCCACCTCAGTACCAGTAGACTTG
CAGTAGACTATCCAAAAGACTTTGTAAAAGTCAATCTCTTGGCAAGTCTGTGAGCATATCCTGTCTGACCCAGTAGAAGCAGCAT
GCAAACACTTATTTCTGCAGGGTCTGCATTTTAAATGTTCAAAAGTAAATGGGAGGCTACTGCCATCTGTGCTATCCTTGTCTT
CCAATGATTTGGAGGCTGTGAAATCTTCTGAATATCCTCAATGTTGGCTGTGAGATGCCAGTAAAATAAGGCACATGTTG
AGGAGGTCTCACTGGGGAAGTACTGCCACCATCTTCCAGTCAACAAGAGGTAGAGGACCAAGATGGCTATGTGTATGTTAAC
AAGGGTGGCCGTCCAAGACAGCACTTACTCTCACTGACCCGAGAGCGCAAAAAGCATCGCTACGAGAGCTCAAACCTCAAG
TAAAAGCTTTTGCAGAGAAAAGAGGGGGGAGATGAAAAGCTGTGTGTTAACTTTTGTCTTCAATGGCTGTGAGATGTAGAT
AATGAACAACAGGCAAGTGTAGTTGGAAGCTATAAAGCAAGGAAAGGATCTGGCCTCCCTCAGCTGTTTGTGGCAAT
CCGAGTCAACACATTTCTCAGCTGCAGCAATACCATAAAATGTACAGGACTGTAAAAGCAATAACAGGCAGACAGATTTTCCA
GCCACTGCATGCTCTCGAACAGCTGAAAAGTCCCTCTGCCAGGTTATCATCTTTCAGTGGAAACCACTTGAAAAATGT

GTCCAGTAATACAGATGTAGGCATTATTGATGGGCTTTCAGGGATGCAGCATTGGCTGATGACTACCCAATAGATACGATAGCA
AAGAGATTTTCGATACGACACAGCTTTGGTTTCTGCCCTAATGGATATGGAAGAAGACATCCTAGAAGGGGCTGAAAATTCAGGAC
TTGGATGACTATTTGAAAAGGCCCTTTCAGTGTGGTGTAAAGAGTCTGTGATGGAATGGGGGATGTTAGTGA AAAAGCACGGC
TGTGGCCCAATGGTCCCTGAGAAGGCAGTTCGATTCTTTACCATCATGAGCATCACTGTCTGTGCATGACAGTGGGAGCACA
AAGATTTTGAAGAAACCAAGCCCAATTCAGAGCTTTGTTGCAAACCTTTGTGCCTTATGCTGGCTGATGAATCAGACCATGAG
ACACTCACGGCCATCTGAGCCCTTTATAGCAGAAAAGAGATTCCATGAAGAGTAGTGTATTAATCCTGGATATGGCTGGAATCC
CCAGAATGTTCAAGTTCATCTTCAGAGGCACTGGGTATGATGAAAAGCTTGTCCGTGAAGTAGAGGGCCTAGAAGCCTCTGGC
TCTACTTACATTTGTACGCTTTGTGATGCAACACGCGTGAAGCCTCCAGAATTTGATCCTCCACTCCATAACAAGGAATCATG
CTGAAAACCTGGAACGGTATGAGGTGTGGAGGTCCAACCCCTACCATGAAACTGTTGATGAACTACGTGACAGAGTGAAGGGT
GTTTCTGCCAAACATTTATTGAGACTGTACCATCAATAGATGCATTGCACTGCGACATTGGCAATGCAGCTGAGTTTACAAGA
TATTCAGCTTGAGATTGGTGAAGTGTACAAAAATCCTGATGCACCAAAAAGAAGAGAGAAAAGAGTGGCAGTCCGCTTTGAT
AAACACCTCAGAAAAGAAAATGAATCTGAAACCTGTAACAAGGATGAATGGAATTTTGTCTGAAAAGCTTATGACGAAAAGAGAC
TGTGGAAGCAGTTTGTGAACTCATTGGGAGTGAGGAGAGGCATGAAGCCCTCAGAGAACTCATGGACCTGTACCTAAGATGA
AACCAGTATGGCGGTCTTCATGTCCACCAAAGAATGTCCAGAAGTGGTGTGCCAGTACAGTTTCAATTCTCAACGTTTTGCAG
AGTTGTTGTCCACAAAAGTTCAGGTATAGATATGATGGCAAGATTACCAATTATTTCCACAAAACCTTGTCTCATGTTCCAGAAA
TATAGAGAGAGATGGCTCCATTGGTGTCTGGGCAAGTGAAGGAAAATGAGTCTGGGAACAAAACCTGTTTAGGCGTGCAAGTAAAGAA
TCGCTTGGCATCAAGGCAGAGCTTCTGGGCAGAACTAAATGTGATGCACCTTGACCATAACAATGGTGTGCATAGTTGCTGC
CAGCACATTTGCCCTGTCAATCAGGATAGTTGGGCACCATAATAATGGAATATGTAGGTAACAGAACTTTGCACCATGTTATCT
ATGGAACCTGGCAATATGACAGCAAAAAGTAAAGGATGATGGCCTGGAGATGGCCATGTGTGTTTGTGACACAACCTCAGGCTCTG
GGTATGCCTGTGACATCATGGCAGGATTGCTTCCCTCCATTACACTTGATTGTGCATCTGGATTTAAAACCTGCTAACATATT
CATCACAGAAACAAAATGTTTGCAA

Mosasaurus 010??1000012111001????-?0002100010102-?010000100000101110100-??00002-001000200001100000100??
10?1001?01??011100110101111001?00?00?000??20010?10001100000?????11?011?0110111--0011000132--1001101101??11000-
1001011002001010100000??12000221-1003110110?10201000?00000?10????????
21203201022111????????????????????????????????????????????????????????????00????
00-----

Platecarpus 010??1000012110001????-?0001100010102-?0200001000001011010100-0-00011-0011100000?
1000000100010021001101??01110011?101110001000?00?000??2001101?00110001?00??11?0111011011??0011000132--100110?101??
01000-1001011002011000100000??12000221-?00?110?10010201000?0??10?00?0?????3220310012211110?0????????????????????
0????????????????????????????????????????????00????
00-----

Anniella 000000000110000010001100100001100-0100010000010001001001000110-010001001?0-0?00-0--
10011001100011111000100110011101210001001000002100-2--100201110000010000021200000000120001-011000201100100100100??
0000-1011021200000000101000?1012001121-020?2101100?00200?0001--1-1--2--4-----2201-1--0-00?21111100-0----000?211011?
10?????0-0?000000000100?????0-?00??
010CACAGGAAATAATAAGGATGCCTTTCATACAAATTACAGAGAGGCTGAAGCTCATCAAGCCAACCTACAGCACCTCTGCC
GCATTTGCGGTGGCTCATTAAAAACTGTCCCTTACAAGAGAAGCCACCCTGTTTCATGGCCAGTGGATGATGAGACACAGGCTC
TTCTGAGAAAAGAAAAGAGAAACGGGCTACATCCTGGCCAGATCTTCTTGCCAAAAGTGTTTAAAGATTGACGTGAGAGGAGACATT
GACACCATCCACCCTACTCATTTTGCCACAATTGCTGGAGTGTGGTTCAAAGGAAATTCAGCAATCCCCGTGTGAAGTGTIATT
TTCCAAGGAATGGCAGGATGGAGTGGCGTCCCATTCATTGAGCTGTGATGTTTGTGGCACTTCTTCCGTGGAGTTAAGAGAA
AGAAGCAAGCCCTGAATCCACAGTTGAGCAAAAAGCTCAGGGTGTGGCGGGACGTGCTAGAAAAATAAAGCGTGTGAGGAA
TATGAGACAAGTGAATCAAAAGGGTTAAATGAAAAAGATTGCCAACTGCAAGAAGATCCACCTCAGTACCAAGATCCTTGACAG
TAGACTATCCTGCGGACTTTGTAAAGTCGATCTCTTGCCAGGTCTGTGAGCACATCCTGTCTGACCCAGTGGAAACGATGTGCA

AGCACTATTCTGCAGAGTCTGCATCCTTAAATGTCTCAAAGTTATGGGGAGCTATTGCCATCCTGTGCTATCCTTGCTTTCCT
ACTGATCTGGAGAGCCCTGTGAAATCCTTCATGAGCATCCTCAACAGTCTGGCTGTGAGATGTCCCGTGCAAGACTGTCATGAA
GAGGTCACTCTGGGAAAATACTGCCACCATCTTTCCAGGCACAAAAGAGGTTGAAGACAAAAGAGGGCTATGTGTACATCAACAA
AGGTGGCAGACCAAGACAACACTTACTCTCACTGACCCGGAGAGCTCAAAGCACCAGGCTAAGAGAAGTCAAGCATCAAGTA
AAAGCTTTTGTGAGAAAAGAAAGGGCGGAGATGTAAAGTCTGTGTGTCTGACTTTGTTCCACTGGCTCTGAGAGCTAGAAA
TGAACACAGACAAGCTGATGAGTTGGAAGCTATAATGCAAGGAAAAGGATCAGGCCTCCATCCCGCTGTTTGTGGCAATCC
GAGTCAACACTTTCTCAGCTGTAGCCAATACCATAAAATGTACAGGACTGTAAAAGCGATAAACAGGGAGACAGATTTCCAGC
CATTGCATGCTTACGAACATCTGAAAAATCCCTCCTACCAGGGTACCATCCATTTGAGTGGCAACCACCCTTGAAAAATGTGTC
CAGTAACACAGAGGTAGGCATTATTGATGGGCTCTCAGGGATACACGTTTGGCTGATGACTACCAGTAGACACGATTGCGAA
AAGATTTGCTATGATGCAGCTTTGGTTTCTGCCCTAATGGATATGGAAGAAGATATCTAGAGGGGTTGAAAACTCAGGACTTG
GATGACTATTTGAAAAGGCCCTTCACTGTGGTGATTAAGAGTCTGTGATGGAATGGGGGATGTAGTGAAAAGCATGGCTGT
GGTCCACCTGTCCCTGAGAAAAGCAGTTGATTCTCTTCCCTCATGAGCATCACTGTTGCTCATGACAATGGGAGCACAAG
ATTTTTGAAGAAAGCAAGCCCACTCGGAGCTTTGTTGCAACCTTTGTGCCTTATGCTGGCTGATGAATCGGACCATGAGACA
CTCACGGCCATCCTCAGCCCTCTGTAAACAGAAAAGAGAGGCCATGAAGAGCAGTGTGTTGATACTGGATATGGCTGGAATCCCC
AGAATGTTCAAATTCATTTTAGAGGGACTGGATATGAAAAGCTTGTCCGTGAAGTAGAGGGCTGGAAGCCTCTGGCTCT
ACTTACAAATGGAGATTTGTGATGCGACGCGCTGAAAGCTCAGAACTTGAATGCTTCACTCCATAACGAGGATCATGCT
GAAAACCTGGAACGGTATGAGGTGTGGCGGTCCAACCCGTACCAGGACTGTTGATGAACTACGTGACCGAGTGAAGGGAG
TTCCGCCAAGCCTTTATCGAGACTGTTCCGTGATAGATGCATTGCACTGTGACATTGGCAATGCAGCTGAGTTTACAAGAT
ATTCCAGTTTGAGATTGGCGAAGTGTACAAAAACCTGTATGCGTCAAAGAAGAGAGAAAAGAGGTGGCAGTCAACTCTTGAC
AAACACCTCAGAAAAGAAGATGAACCTGAAGCCTGTAACAAGGATGAATGGAATTTTGTAGAAAAGCTGATGTCGAGGAGA
CTGTGGAAGCAGTTTGTGAAGTGGTCAAGTGTGAGGAGAGGCATGAAGCCCTCAGAGAGCTCATGCACCTTTATCTTAAGATG
AAACCAGTCTGGCGGTCTTCATGTCCACCAAGGAATGCCAGAAGTGGTATGCCAGTACAGTTTCAACTCTCAACGTTTTCGA
GAGTTGCTGTCCACAAAGTTTCAGGTACAGATATGATGGCAAGATTACCAATTACTTTACAAAACTCTTGCCCATGTTCCAGAA
ATTACAAATGGAGATTTGTTGCTTGGGCCAGTGAAGGAAATGAGTCTGGGAACAACTGTTAGGCTGAGGATGAGTGAAG
AATCAATTTGGCATCAAGACAGAGCTTCTGGGCAGAACTGAATGTGGCACGCTTGACCACGTCAATGTGGTGCATGTAATAGCT
GCCAGCATGTGCCCTGCCAATCAGGATAGTCTGGGCACCATAATAATGGAATATGTAAGTAACAGCACTCTGCACCATGTTA
TCTATGAGACTGGCAGTATGACAAACAAAAAG--

GGATGATGGTTTGGATGGGCTATGTGATTTGAGTACAGCTCAGGCTCTGAGCTACTCTGTGACATTGTGGCAGGCTTAATC
TTCCCTCCATTCACAGTTGATTGTTACCTGGATTAAAAACCTGTAAACATATTCATCACAGAA-----

Typhlops 101010000110201-000001000-3-0-000--03--1-----10001003-0-01100100100-3-11-00-101--1--1--1--
001010011-21101-021000010-00-012211----11000?112-2-01010?031110001100-10-11---0001320-20-1-10100-0000-0-000100000200-000?
0201011012211221-020?210?110002-2110002----2--1--2-----22-1-2---?000?2-110100-0---0111????1???
0????????????????????????????????1(0 1)?10??
010-----

ACTCTGTTGATGACTATCCAGTAGACACAATTGCAAAAAGATTTCGATATGATGCTGCTTTGGTGGCTGCCCTTATGGATATAGAA
GAATATATCCTGGAAGGCTGAAAACTCAGGAAGTGGATGACTATTTGAAAAGGACCCTTCACTGTGGTGATTAAGAGCTCTGC
GACGGAATGGGAGATGTCAGTGAAGAGCATGGCTGTGTCGCCAGTGTCCCTGAAAAGCGGGTTCGATTTCTCCTTACTCATG
AGCATCACAGTCACTATGACAATAGCAGTGTGAAGATTTTGAAGAAAACAAGCCCAATTCAGAGTTGTGTTGTAAGCCTTTG
TGCCTTATGCTGGCTGATGAGTACAGACACTGACAGCCATCCTGAGTCTCTTATGGCAGAAAAGGGAGGCCATGAA
AAATAGTGTACTGATACTCGATATGGGTGGTATCCCAAGATATCAAAGTCACTTTAGGGGCACTGGATATGATGAAAAGCTTA
TCCGTGAAGTTGAGGGCCTTGAAGCCTCCGGATCTACTTACGTTTGCACACTTTGTGATGCAACACGCTTGGAAAGCCTCTCGGA
ACTTAACCTCCATTCATAACCAGGAGTCACTGTAACCTGAAAAGGATGAGGTGTGGCGGTTCAATCCCAACCATGAAG
CTGTTGATGAACTGCGCAACCGAGTGAAGGAGTTTCTGCCAAGCCTTTTATTGAAACAGTTCCTTCGATTGATGCATTACACT
GTGACATTGG-
AATGCAGCTGAATTTTACAGATTATCCAGCTTGGATTGGTGAAGTATACAACAACCCCAATGCAACGAAAGAAGAGAGGAA
AAGGTGGCAGTCACTCTTGACAAAACCTCAGAAAAGAGATGAAATGAAAGCCTATGACAAGGATGAATGGAAACTTTGCA
AGAAAACCTCATGAGTATGGAGACTGTGGATGCAGTCTGTGAACATAATAAAGTGTGAAGAGAGACACGAAGCCCTCAGAGAATT
AATGGACCTCTACTGAAAGATGAAACCAGTATGGAGGCTTTCATGTCACCAAGGAATGTCAGAACTTGTATGCCAGTATAG
TTTTAACTCTCAGAGGTTTGTGAGTTGCTTTCTACTAAATTCAGTTTACAGGTACGAGGGCAAGGTTACCAATTACTTTACAAA
GCATTGCTCATGTTCCAGAAAATATAGAAAAGAGATGGTTCCATTGGTCTTGGGCAAGTGAAGGAAATGAATCAGGCAACAA
ATTGTTTAGGCGTGCAGTAAGAACCATTTGGCATCACGACAGAGCTTCTGGGCAGAACTAAATGTAGCACGCTGTTGGCCATAAC
AATGTGGTACGCATAGTAGCTGTAGCACATGATCCCTGTAGTCCAGGATAGTTTGGGTACCATAATAATGGAATATGATAGTTAA
CTGCACTTTGTACCATGTCATCTATGGAAGTGGCTGCTTTACAAGAA--
AGAAGGATGATGGGCTTAAATGTGGCCATGCATTTTGGACATAGTCACTCTCAGTTACTCCCATGACATTGTGGCAGGATT
AATGTTTCTCCATTCACAGTTAATAGTGCATCTGGATTAAAAACCACTAACATATACAT-----

Leptotyphlops 1010100000110201-001004000-0100-000--03--1-----10000003-0-01100200100-3-02--0-101--1--1--1--
000010011010101-021100011-00-012211----11000?112-2-01010?031?10001100-10-01---0001320-20-1210100-000000-
0001000002000000?0210011012211221-020?210?110002-2010002----2--1--2-----2---2---?000?2-111100-0---0111????1???
0????????????????????????????????10?10??
010-----

TGCATGCTCTCCGAGCAGCCGAAAAATCCCTTCTGCCTGGTTACCATCTATTTGAGTGGGAACCTCCCTTGAAAAATGTGTCTAG
TAATACTGAAGTTGGCATTATTGATGGGCTCTCAGGCATACAACAGTGTGTTGATGACTATCCAGTGAATACAATTTCAAAAAGA

TTTCGTTATGCTAGCTTTGGTGGCTGCTCTTATGGATATAGAGGAAGACATCTAGAAGGCTGAAGAATCACAACATGGATG  
ACTATTTGAAAGGACTCTTCACTGTGATAATTAAGAATCTGTGTGGAATGGGAGATGCAGTGA AAAACATGGCTTTGGCT  
CCGTGTACCTGAAAAGGCACTTCGGTTTCCTTTACACTGTATGCCATCTCAAGACAAGTGGCAGTGTGAAGATTTT  
TGAAGAAAACAAGCCCAATTCAGAGTTATGTTGTAAGCCCTTGTGCCCTATGCTGGCTGATGAGTGCAGACCATGAGACTCAC  
AGCCATGCTGAGTCTCTTATAGCAGAAAAGGGGAGGCAATGAAAAATAGTATACTAATACTTGTATATGGCTGGTATTTCCAGACAA  
TTCAAATTCATCTTAGGGTACTGGATATGATGAAAAATGTCCGTGAAAGTTGAGGGCCTTGAAGCCCTCAGGCTCTACTTACA  
TTTTGCACACTTTGTGATGCAACACGACTGGAAGCCCTCTCAGAACTTAATTCTTACTTCTGTAACCAGGAGTCACTGAAAAC  
TTGAAAGGTATGAGGTTTGGAGATCCAATCTTATACGAAGCTGTTGATGAACTGCGCAGCCGAGTGAAGGTGTTTCTGCCA  
AGCCTTTTATGACACTGTCTTCAATGATGCATTACATTGTGACATTGGCAATGCAGCTGAATTTTACAAGATATCCAGTTG  
GAGATTGGTGAAGTGTACAAAA--CCA-TGCAAC-A-AGAAGAGAGAAA-  
AGGTGGCAGTCAACTCTTGACAAACACCTCAGAAAGAAGATGAATTTGAAGCCTGTAACAAGGATGAATGGAAATTTTGCAAG  
AAAACCTCATGAGTAAAGGAGACCGTGAATGCAGTTGTGAACTAATAAGTGTGAAGAGAGACATGAAGCCCTCAGAGAATTA  
TGGACCTTTATCTTAAGATGAAACCAGTATGGAGATCTTCATGTCCCACAGAGAATGTCCAGAACTGTATGTCAGTATAGCTT  
CAACTCTCAACGGTTTGTGAGTGTGTCTACGAAATTCAGTTACAGATATGAGGGCAAGATTACCAACTATTTTCAAAAA  
ACTTGTCTCATGTTCCAGAAATATAGAAAGAGATGGTCCATTGGTGCTGGCAAGTGAGGGAAATGACTCAGGCCAACAAAT  
GTTACGGCTGACAGTAAAGACCAATGGCATCACGACAGACTTCTGGCAGAACTAAATGTAGCAACTGCAGTGGCCACAACAA  
TGTGGTACGCATTGTAGCTGCTAGCAGTGCCTCTGCTAGTCCAGGATAGTCTGGGTACCATAATAATGGAATATGTAGGTAATC  
ACACTTTCACCATGTCATCTATGGGACTGACTTTTTCAACAACAGACAAAAGGATGATGGGCTTAAATGTGGCCATGCATTTT  
GAGCATAGCTCAGGCTCTCTGTTATTCTGTGACATTGTAGCAGGGTAAATGTTTCTCCATTCACAGTTAATGTACATCTGGATT  
TAAAGCCTG-----

ANILIOIDEA 10101100001(1 2)020(0 1)0000120000100100001--03-001-----1000003-1001-0030-110-3-0(0 2)-10-  
10(0 1)10-0--1-11--0010100111001(0 1)2-0(1 2)1100000000-002211-1--11101?1202-0100000211110011(0 1)0011--00-  
1000132002011200100--100(0 1)0-0010-100300000010(0 2)001101200(0 1)221-??0?21011100?2-201?002---2--1--2-----2??1-01--  
0000?2-1?0100-0----0110411?1?0?0??0??0?--?0000?00??1-20??01?00?011??

000GCTTAGCAATAGATAAAGATGGTTTACAGTGTGAGCCAAAGAGAGATGGA AACTCACAAGCAAACTGCAGCACCCTGTGTC  
GCATCTGTGGAGGCTCACTGAAAACCTTTACAAAAGATGTCATCCAGTTCATGGGCCAGTGGATGAGGAGACCCAAGCT  
CTTTTGAGAAAAGAAAGAGAAAAGGGCCACTTCTGGCCAGATCTATTGCCAAAAGTTTTAAGATTGATGTCAAGGGAGATATT  
GACAGATCCACTACTAATTTTGGCACAATTGTGAATGTGATTCAAAAGAAAAGTCAAGCAATGCCCATCATGAAGCACTT  
CTTCAAGGGAAAGACAGTGGAAATGGCATCCCACTTCAAGCTGTGATGTTTGGCATTCTTTTTGGGCATCAAGAGA  
AAGAAGCAACCTGAATTCACAGCTGAGCAAAAAGCTCAGAATTGTCTGGATGTACTAGAAAATAAGATGTGTAAGGAA  
RGTAAGCAAAATGAATAACAAAAGTTAATGAAAAAGATTCAAACCTGTAAAGCAGATCCATCTCAGTACAAAAGGCTCTGCAAT  
AGACTATCTGTGGACTTTGTAAGTCAATATCTGCCAGATCTGTGAGCAGCTTGGCTGATCCAGTAGAAAACAACCTGTAA  
ACACTTATTCTGTAGAGTCTGCATTCTTAAATGTCTTAAAGTAATGGGCAGCTATTGCCATCTGCCATCTTGTCTTCCATC  
TGATCTGGTGAGCCCTGTA AATCTTCTTAAAGCATTCTCAACAATTTGGTTGTGAGATGTCCAATGAAAGGCTGTCATGAGGA  
GGTCTTTTTGGAAAATACTGCCAACATTGTCTAATCATAAAGAGGCAAGGCAAGAGACAGCTATGTCTATATCAACAAAAGG  
TGGCCGACCGAGACAACATTTGCTTCACTACCCGGAGAGCTCAAAGCACCCTGTGAGAGAACTCAAGCTTCAAGTGA A  
GCTTTTTGAGAAAAGAAAGAGAGGAGACATGAGTCTGTGTGCCACTTTGCTTCTGCTGGCTTTGAGATCTAGAAAATGA  
GCACAGACAAGCAGATGAATTGGAAGCGATAATGCAAGGGAAGGGATCGACCTTCACTCCAGCTGTTTGTGGCAATCCGAG  
TCAACACCTTCTCAGCTGCAGCAATATCATAAAATGTACAGGACTGTAAGGCAATTACAGGAAGGCAAGATTTCCAGCCTT  
TACATGCTCTCCGAAACAGTGTAGAAGTCCCTTCTGCTGTTATCATCCCTTTGAATGGGCACCCTCCCTGAAAATGTGTCTAG  
TAATACTGATGAGCATTATTGTGGGCTCTCAGGAATCAACAATCTGTGGATGACTACCCAGTGGACACAATAAGAAAAG  
ATTTGATATGATGCAGCTTTGGTGGCTGCCCTTATGGATATGGAAGAAAGAAATCTAGAAGGACTAAAACTCATGACTTGGAT  
GACTATTTGAAAGGACCTTCACTGTAGTATGAAAGAATCTGTGATGGAATGGGTGATGTGAGTGA AAAAGCATGGCTGTGGC  
CCAGCTGTGCCTGAAAAGGCAAGTTCGATTTCTCTTACCCTCATGAGCATCACTGTGAGTCAATGGCAACCTGGAAGATT  
TTTGAAGAAATCAAACCAATTCAGAAGTGTGTGTAAGCCCTTTGCTTATGCTGGCTGATGAGTCAAGCACTGAGACACTC  
ACCACCATCTGAGTCCCAATGGCAGAAAAGGGAAGCCATGAAAATAGTGCATTAATCTTATATGGCTGGTATTCCAGAA  
CTTCAAATTCATCTTTAGGGCACTGGATATGATGAAAAGCTTGTCCGTGAAAGTGCAGGGTCTTGAAGCCTCAGGCTCTACTTA  
CATTTGTACACTTTGTGATGCTACCCGCTGGAAGCCTCTCAGAACTTACTCTACATTCATAAACAGGAGTCAATGCTGAAAAC  
CTAGAACGATGAAAGTGTGGCGTCAATCCCTACCATGAAGCTGTGACGAAGTGCATACCCAGTGAAGGTTTTCAGTGC  
AAGCCTTTTATGAGACTTGCCTTCAATAGATGCATGCAATGTGATGCAATGGCAATGCAGTGAATTTTATAAGATTTCCAGTT  
TGAGATTGGTGAGGTGTACAAAACATCCAATGTAACCAAGAAAGAGAGAAAAGAGGTGGCAGTCAACTCTTGACAAAACACCTT  
AGAAAAAAAATGAATTTGAAACCTATAGCAAGGATGAATGGAATTTGCAAGAAAACCTATGAGTGGGAGACTGTGGATGC  
AGTTTGTGACTAATAACAGTGTGAGGAGACATGAAGCCCTCAGAGAATTAATGGACCTTTACCTTAAAGTGA AACCCAGTATG  
GAGGCTTCTATGTTCCCAAGGAATGCCAGAACTGTATGTCATAAGCAAGTTCAACTGAGTGGCTTTGCTGACTGTGTC  
CACTAAATTCAGTTACAGATATGCAGGCAAGATTACCAATTACTTTCAAAAAACTTGTCTCATGTTCCAGAAAATATAGAAAGG  
GATGTTTCCATTGGTGCCTGGGCAAGTGAAGGAAAATGAGTCAAGCAACAACCTGTTCCAGACGTGCAGTAAAGAACCATTGGCA  
TCACGACAGAGCTTCTGGCAGAACTAATGTAGCAGCTTGGCCATAACAACGTGGTACGCATAGTAGCTGTAGCACATGC  
ACCCCTGTAGTCAGGATAGTTGGGCACCATAATTATGGAATATGTAGGTAATTGCACTCTACACCATGTTATCTATGGGACTGG  
CTATTTAAGAGGAA---

AAGAGAATGATGGGCTTAAATGTGACCATGGGTTTTTGTAGTACAGCTCAGGCTGTGACTCTGTGATATTGTGGCAGGATT  
AATGTTTCTCCATTCACAGTAAATGTGCATCTGGATTAAAACCTGCTAACATATTCATCACAGAAACATAATGTTTGCAA

NeoMACROSTOMATA 10(0 1)01100001(1 2)02?1-0000(0 1)30000(0 2)10010000--03-001-----10?00003-1101-00(1 3)0-  
11(0 1)-3-(0 1)2-?0-1001000??-1?(0 1)1--001010121(0 1)(0 1)0102-0(1 2)1100000010-002211-(0 1)--1110101202-010001021110001110-  
10000-00001(1 3)21(0 1)20(0 1)1200100?-0000-00010-0003(0 1)000(0 1)10(0 1)000110120(0 1)1221-??0?210111(0 1)0?2-201?002----  
2--1--2-----2??1-01--0000?(1 2)(0 1)?0100-0-----0110411?1?0?0??0??0?--?0000?00??1-2(0 1)?01?00?1(0 1)??  
000GCTTGGCAGGAGAAAAGAGGTGTTTACATGAGCCAAAGGAGACAGAAGCTCACAAGCAAAGCTGCAGCACCTCTG  
TCGACTCTGTGGAGCCTCACTGAAAACCTGACCCTTACAAAAGGTGTCATCCAGTTCAATGAGTGGCAGTGAATTTAAGATGAGGAGACCCAGG  
CTCTTTTGAGAAAAGAAAGAGAAAAGGCCACTTCTGGCCAGATCTTCTTGCCAAAAGTTTTTAAGATTGATGTAAGGGGAGAT  
ATTGACACAACCCATCCTACTCAATTTTGTCACAATTTGTGAAAGTGAATTCAGAGAAAAGTCAAGCAATGCCCCCATGAAGCA  
CATCTTTAGAGAAAAGCAGTGGAGTGGCATCCCCATCAACAAGCTGTGACGTTTGTGTCATCTTCTGGTGGATGATGCAAG  
AGAAAAGAAACCAATGTTGAAATTCACAGCTGAGCAAAAACCTCAGGATTAATGCTGGACGTAAGAAAATAAGATGCGTAAG  
AAAGGTAAGCAACTAAATAACAAAAGTTAATGAAAAGATTTCAACTGTAAGCAGATCCACCTCAGTACAAAATCCTTG  
CAATAGACTACCCTGTGGACTTTGTAAAAGTCAATATCTTGCAGATCTGTGAGCACATCTGGCTGATCCAGTAGAAAACAACATG  
TAAACACTTATCTGTAGACTCTGCATTTAAATGTCTTAAAGTAAAGTAAAGGTMAGCTATTGCCATCTGCCAATATCTTGTTC  
CCACTGATCTAGTGAGCCCTGTAAATCTTCAAGTACTCCTCAACAATTTGGTTTTGAGATGCCAATAAAAAGGCTGTCATGA  
GGAGGCTTTTTTGAAAATAACTGCCAACATCGTTCTAATCACAAGGGCAGAAAAGTACAGACAGCTATGTCTATATCAACAA  
AGGTGGCCGACCGAGACAACATTTGCTTTCAATTGACCCGGAGAGCTCAAAGCACCCTGAGAGAACTCAAGCTTCAAGTG

AAAGATTTTGCAGAAAAAGAAGAGGAGGGGACCTGAAATCTGTGTGCCTAACTTTGTTCTGCTAGCTTTGAGGTCTAGAAA  
 TGAGCACAGACAAGCAGATGAACTGGAAGCTATAATGCAAGGGAAGGGATCAGACCTTCATCCAGCTGTTTGTGGAATCA  
 GAGTCAACACCTTTTCTAGCTGCAGCCAGTATCATAAAATGTACAGGACAGTAAAGGCAATTACAGGAAGGCAAATTTCCAGC  
 CTTTGCATGCTCTCCGAACAGCTGAGAAGGCCCTTCTGCCTGGTTATCATCCCTTTGAATGGGAACCTCCTTTGAAAAATGTGTC  
 TAGTAACACAGACGTAGGCATTATTGATGGGCTGTCAGGAATACAACAGTCTGTGGATGACTACCCAGTGGATACAATTTCAA  
 ACGATTTTCGATGATGTTGCTTTGGTGGCTACCCCTTATGGATTAGAAGAAGAAATTTAGAAGGACTGAAAACCTCATGACTTG  
 GATGACTATTTGAAAGGACCTTTCAGCTGTTGTGATTAAGAATCCTGCGATGGAATGGGAGATGTCAGTGAAGAAAGCATGGCAGT  
 GGCCAGCTGTTCTGAAAAAGCAGTTCGATTCTCTTACCCCTTATGAGCATCACTGTAACTCATGAGCGTGGCAGTGAAGG  
 ATTTTGAAGAAAGCAAACCAATTGAGATTGTTGTTGTAAGCCCTTATGCCTTATGCTGGCTGATGAGTCAAGTCAATGAGACCC  
 TCACTGCCATCCTGAGTCTCTTATAGCAGAACCGGAAGCCATGAAAAATAGTACATTGATACTTTATATGGCTGGTATTCTAGA  
 ATTTCAAATTCATATTAGGGGGCACTGGATATGATGAAAAAATCGTCCGTGAAGTTGAGGGTCTTGAAGCATCAGGCTTACTT  
 ACATTGTACATTATGTGATGCCACTCGCTAGAAGCCTCTCAGAACCTAATCCTGCATTCTGTAACCAGGAACCATGCTGAAAA  
 CCTAGAACGGTATGAAAGTATGGAGTCCAATCCTTACCATGAACTGTAGATGAACTACGTCACAGAGTGAAAGGTGTTTCGGC  
 CAAGCCTTTTATGAGACTGTGCTTCAATAGACGCACTTCACTGTGATATTGGCAATGCCGCTGAATTTACAAAATATCCAGT  
 TTGAGATTGGCGAGGTGTACAAAATCCCAGTCCAACAAAGAAGAGAGAAAGAGATGGCAGTCAACTCTTGACAAAACCT  
 TAGAAAAAAGATGAATTTGAAAACCTGTAACAAGGATGAAAGTGGAAATTTGCCAGAAAACCTCATGAGTAAGGAGACTGTGGATG  
 CAGTCTGTGAATTAATGAAATGTGAAGAGAGACATGAAGCCCTCAGAGAATTAATGGACCTTTACCTTAAGATGAAACCATGAT  
 GGAGGTCTTCATGTCCAACCAAGAATGCCCAGAACTGTATGTCAATACAGTTCAACTCTCAGAGATTGTGCTGAGTTGCTGT  
 CAACTAAATTCAGTTACAGATACGATGGGAAGATTACCAATATTTTCATAAACACTTGTCTCATGTTCCAGAAATATAGAAGC  
 AGATGGTCCATTGGTGCCTGGCAAGTGAAGGAAATGAGTCAGGCAACAAACTGTTACAGACGTGCAAGGAGAAAGCATTGGC  
 ATCAGCGCAAGCTTCTGGGCGAAGTAAATGTAGTACGTTGACCATAACAATGTGGTACGCATAGTAGCTGCTAGCACATG  
 TACCCTGCTAGTCAAGATAGTTGGGTACCATAATATGGAATATGCAGGTAATTGCACCTACATCATGTTATCTATGGGACTG  
 GCTATTTAACAGGAA---

ATAACAATGATATCCTTAAATGTGACCATGAGTTTTTGTGAGTACAGCTCAGGCTGTCAATTACTCCCATGATATTGTGGCAGGGTTA  
 ATGTTTCTTCACTTCTCAGTTAATTGTGCATCTGGATTTAAAACCTGCTAACATATTCATCACAGAACATAATGTTTGCAA

Xenopeltis 10101100001202?1-00001300002100100000--03-001-----10?00003-1101-0030-110-3-02-?0-1001-01---1-11--  
 001010111100102-011100000000-002211-0--1110101202-01000?02111001110-101100-0000132002011200100?-00000-00010-  
 100300000010000011012000221-??0?21011100?2-201?002----2--1-2-----?--2?-1--1--0000?2-1?0100-0----0110411?1?0?0?????-??0?  
 0?????1-20??01??00?10??  
 000-----  
 -----  
 -----  
 -----  
 -----  
 -----  
 -----  
 -----

TGCATGCTCTCCGAACAGCTGAGAAGGCCCTTCTGCCTGGTTACCATCCCTTTGAATGGGAACCTCCCTTGAAAAATGTGTCCA  
 GTAATACTGATGTAGGCATTATTGATGGCCTCTCAGGAATACAACAGTCTGTGGATGACTACCCAGTAGACACAATTTCAAAAAAG  
 ATTTTCGATATGATGCAGCATTGGTGGCTGCCCTTATGGATATAGAAGAAGAAATCTTAGAAGGACTGAAAACCTCATGACTTTGGCT  
 GACTATTTGAAAGGACCCTTCACTGTAGTATTAAGAATCCTGCGATGGAATGGGAGATGTCAGTGAAGAGCATGGCAGTTGG  
 CCCAGCCGTTCTGAAAAAGCAGTTCGATACTCCTTTACCCTCATGAGCATCACTGTCACTCATGACAATGGCAGCGTGAAGAT  
 TTTTGAAGAAAGCAAACCAATTGAGATTGTTGTTGTAAGCCCTTTGTGCCTTATGCTGGCTGATGAGTCAAGCATGAGACACT  
 CACTGCCATCCTGAGTCCCCTTATAGCAGAAAGGGAAGCCATGAAAAATAGTTCATTAATACTTTACATGTCTGGTATTCCCA  
 ATTTTAAATTTATCTTAGGGCACTGGATATGATGAAAAGCTTGTCCGTGAAGTTGAGGGCCTTGAAGCCCTCAGGCTCACTT  
 ACATTTGTACACTCTGTGATGCCACCCGCCTGGAAGCCCTCAGAACCTAATCCTACATTCTATAAACCAAGGAGTCACTGCTGAAAA  
 CCTAGAACGATATGAAAGTGTGGCGTCCAATCCTTACCATGAACTGTGTTGATGAACTGCGTAACCGAGTGAAAGGTGTTTCTGC  
 CAAGCCTTTTATGAGACTGTGCTTCAATAGATGCACTGCACTGTGACATTGGCAATGCAAGCTGAATTTACAAGATATTCCAG  
 TTTGAGATTGGTGGTGTACAAACATCCAGTGTATCCAAGAAGAGAGAAAAGAGGTGGCAGTCAACTCT-----  
 -----  
 -----  
 -----  
 -----  
 -----  
 -----  
 -----  
 -----  
 -----  
 -----  
 -----  
 -----

TGCAGTAAGAACCATTGGCATCAACAAGACCTTCTGGCAGAAGCTAAATGTAGCACGCCTTGGCCATAACAACGTGGTACG  
 CATAGTACTGCTAGCGCATGTACCCTGTAGTCAGGATAGTTTGGGCACCATAATATGGAATATGTAGGTAATTGCACTCTAC  
 ACCACATTATCTATGGGACTGGCTATTTAACAGGAA---

AGAAGAATGATGGGCTTAAATGTGACCATGGGTTTCTGGGTACAGCTCAGGCTGTCACTTACTCCTGTGATATTGTGGCAGGGT  
 TAATGTTTCTTCACTCAGTTAATTGTGCATCTGGATTTAAAACCTGCTAACATATACAT-----

Dinilysia 1?10110000?0?1-000012000?01001000?0--03-001-----100100?0-??01-0020-111-3-00-?0-100110101-0011--  
 00?01?0110101020111100000100-0022?1?1--1?00??11202-01??0?21?11001?100?0???-10001?210201120?100-?00000-00010-00030?  
 00001??000??12010221-????210?1???2??010?2---2--1-2?-----?????  
 1????????????????????????????????????????????????????????????00?????  
 00?-----  
 -----  
 -----  
 -----  
 -----  
 -----  
 -----  
 -----  
 -----  
 -----  
 -----  
 -----  
 -----  
 -----  
 -----  
 -----  
 -----  
 -----  
 -----  
 -----











Erdenesaurus 000??1??111??000??????0??000000?0?0??010??00110?0011(0 1)?20????0-????1001?0?0?  
0001000000100210011000????1000?0010?00?01111200??00????????????????????00??11?000?1001??????  
1000202100001010010000?????????  
0410000000000000????????????????????????????????????????????????????????????????????????????????  
????????????????????????????  
00?-----

Adamisaurus 0000001?01110?00010000300100000000000101?00000000000100010?0-??100011?012022?  
0001000200100?10021001???0001?00010100201-1110000?0?????????????0?10?00??????1??000?0001?0001-000102000-  
0000010010?00??011000?  
000114000000000000??????????????????????????????????????????????????????????????????????????????-  
0????????????????????????????????????????0-????  
00?-----

Cherminsaurus 0000?0100111??00010?00??1?000000?0?0?01000001?0000110?200?????????1001?0?0?00?0000??  
100210011001????10001000101002?11112000??0?0?0?????0?????0?????????1??000?1001??1--1--1000002100001010010000??  
0100001000410000000001000????????????????????????????????????????????????????????????????????????????  
????????????????????????????????0?????  
00?-----

Gobinatus 000??01001110?0001000030??01??0000?0010100000110001?100200?????1??001?01?  
02000000100200100210021000????100010001010010?-?110000000000??????010??10?00?00??11?0000000??0000?010000020-  
000101?010000??0110000000010000000?01000??12?0??1-??0?01?1?????????????1010?01??????00?  
0????????????????????????????????????????????????????????????????????????????????0?????  
00?-----







CTTCTGGGTACAAAATTCAGTTACAGATATGAGGGCAAGATTACCAATTACTTTCACAAAACCCCTTGCTCATGTTCCAGAAATTA  
TTGAAAAGAGATGGATCAATTTGGTCTTGGGCAAGTGAGGGAACCGAGTCTGGGAACAAAACCTTTCAGACGTGACAGTAAGAAY  
AGTTTGGCATCACGGCAGAGTTTCTGGGCAGAATTAATGTGGCACATCTTGACCATAACAATGTGGTRCGTGTAGTAGCTGCT  
AGCACATGTRCTCTGCGCGTCAGGATAGTTTGGGCACCATAATAATGGAATATGTAGGTAACAGAACCTGACACCATGTTATCT  
ATGGGACAGACTGCAAGACAGCAAASAGGAAGGATGATGGGCTTGATGTGGCCACGTGCTTTGAGCATAACTGAGGCATTR  
GGCTATTCCTGTGACATTGCAGCAGGTCTAGTCTTCTCCATTACATTTGATTGTGCATTTGGATTAAAAACCTGCTAATGATT  
CATCACAGAACAATGTTTGC

IGUANIDAE 00(0 1)000101(0 1)110000100003001000001010000(0 1)0100000110001(0 1)110(0 1)1000-??  
000001001000(1 2)000??0?0000101?00?00000001?000100000101(1 2)1110000(0 1)?00000000101-00?(0 1)0011000000000?  
011200000000--000000100203(0 1)1000100110101?00000-00002004000000000000000012000101-100001010?000000000(0  
1)000110011000001000000-100010000001000001-000000-0----0000100000?00?0?0?00????????????(0 1)0?00?0-?00?00-  
TTCAGACAATAGATAAGAGTGCCTTTCATATGAGCCAAAGAGAGGGCTGAAAACACACCAGGCAAACTGCAGCATCTCTGCCGC  
ATCTGTGGAGGCTCATTTAAACTGAACCTTGTAAAGAGAAGCCATCCAGTTCATGGACCAGTAGATGATGAGACTCAGGCCCTT  
CTCAGAAAAGAAAAGAGAAAAAAGCAACATCTTGGCCAGATCTCCTTGCCAGAGTTTTAAGATTGATGTGAAAGCAGACCTTGA  
CACAATCCACCCTACAAAATCTGTCAACACTGTTGGACTGTAGTTCAAAAGAAATTAAGCAATCCCATGTGAAGCATTTTTT  
CCAAGGAGAGCCCAAGTGAATGGCAATCCCATGCTCGAATGCTGATGCTGATGTTGTGGTACTTCTCCCGTGGAAAGAGAAA  
GAAGCAAGTCTTAATCCACAGTTAAGCAAAAAACTGAGGCTGGTGGCTGGACGTGCTAGAAAAATAAGGCAGGTAAAGATTC  
CAAAAACAAGTCAACCAAAAAGAGTTAATGAAAAAATTGCCAACTGCAAGAAGATTACCTCAGTACCAAGATCCTTGACAGTA  
GACTATCCTGCGGACTTTGTAAGTCAATCTTGGCAGATCTGTGAGCATATCCTGGCTGATCCAGTAGAAAACAACATGCAAGC  
ACCTTTGCTGAGAAAGAAGAGGGGGAGATGTCAAAGTAAATGGGAAGCTATTGGCCAGCTTGTCCGCTGCTTCTCTACT  
GATTTGGTGAGCCCTGTGAAATCCTTCTGAACATCCTGAACAGTCTGCCTGTGATATGTCAGTGAATGATTGTCAGGAGGAG  
ATTTGTTTGGGAAAATACTGTACCATCTTCCAGACACAAGGAGGTAGAAAACAAAGAGGGCTATGTGTACGTAAACAAAGG  
TGGCCGACCGAGACAACACTTACTTTCTTGACAAGGAGAGCTCAAAAAGCACCCGCTAAGAGAACCTCAAGCTACAAGTAAAA  
GCTTTTGTGAGAAAGAAGAGGGGGAGATGTCAAAGTAAATGGTGTCTAAGTTGTTTCTGAGAACTTGGCTGAGAGCAAGAAATGA  
ACACAGACAGGCCGATGAGTTGGAAGCTATAATGCAAGGGAAGGGGTCAGGTCTTCATCCAGCTGTTTGTCTGGCAATCAGAG  
TCAATACTTTTCTCAGCTGTAGCCAGTACCATAAAATGTATAGGACTGTGAAAGCTGTAAGTGGGCGACAGATATCCAGCCACT  
CCATGCGCTTGAACCTGTGTGAAAAGTCCCTTTTGGCCAGTTACCATTCAATTTGAGTGGAAACCACCTTGAAAAATGTTTCCAG  
TAACACAGAAGTAGGATTATTGATGGGCTTTCAGGCATAACAATTCGGTGTGATGATTACCCAGTGGACACAATGCAAGAGAGA  
TTTCGATATGATGCAGCTTTGGTTTTCTGCCTTGATGGATGAAAGAGACATCCTAGAAGGCCTGAAAAGTCAAGGATCTGGATG  
ACTACTTCAAAGGTCCATTCACTGTGGTGATTAAGAGTCCCTGTGATGGAATGGGAGATGTTAGTGAGAAAACATGGCTGTGGCC  
CAGCTGTCCCTGAGAAAGCAGTTTCGATTTCTTTACACTCATGAGCATCTCTGTCACTCATGACAATGCAAGCATAAGGATTTT  
TGAGAAAAACAAGCCCAATTCAGAAGTGTGTTGTAACCTTTGTGCCTTATGCTTGTGATGAATCAGACCATGAGACACTGAC  
AGCCATCTGTGATGTTGTCAGAAAAGAGAGGGCCATGTAAGGACAGTGTACTGATACTTGATGGCTGGAATTTACAAGATATCC  
CATTCAAATTCATCTTTAGGGGCACTGGATATGATGAAAAGCTTGTCCGTGAAGTAGAGGGCCTTGAAGCCTCAGGGTCTACTT  
ATATTTGCACTCTGTGTGATGCAACACGCCAGGAAGCTTCCCAGAACTTGATCCTTCACTCCATCACAAGGAGTCAATGCGGAAA  
ACCTAGAACGGTATGAGGTGTGGCGTCCAATCCCTACCACGAACTGTTGATGAACTACGTGACAGAGTGAAGGGGGTTTTCT  
GCAAAAACCTTTTATTGAGAGCTTCTTCTCGATAGATGACCTTGTGTGTGACATTGGCAATGCAAGTGAATTTACAAGATATCC  
AGTTTGAGATTGGTGAAGTCTACAAAAACCTGATGCATCAAGGGAAGAGAGAAAAGAGATGGCAATCAACTCTTGACAAAACA  
CCTCAGAAAAGAAGATGAACCTGAAAGCCTGTAAACAAGGATGAATGGGAATTTGCCAGAAAAGCTCATGAGTAAGGACACTGTGG  
AAGCAGTTTGTGAATTAATAAGAGTGAGGAGAGACAGGAAGCTTTAGAGAACCTCATGGACCTTTACCTTAAAGATGAAACCA  
GTGTGGCGGTCTTCATGCTCCACAAAAGAATGCCAGAACTTGTATGTCAGTATAGTTTCAATTCACAGTTTTCAGAGCTAC  
TGGCTACCAATTTCCGTTATAGATATGAGGGCAAGATTACCAATTACTTTACAAAACCCCTTGCTCATGTTCCAGAAAATTTAGAG  
AGAGATGGATCTATTTGGTGTCTGGGCAAGTGAGGGAATGAGTCTGGGAACAAAACCTTTCAGACGTGCAGTAAGAACAGTCTG  
GCATCACGGCAGAGTTTCTGGGCAGAAATTAACGTTGGCACATCTTGAACATAAAAAATGTTGATGCTGTAATAGCTGCTAGCACA  
TGTGCCCTCGAGCTCAGGATAGTTTGGGCACCATTATAATGGAATGATGTAAGGTAACAGCACTCTGCACCAATTCATGTTGGGA  
CTCACTGCAAGACAGCAACGAAAGGATGATGGGCTTGGATGTGGCCATGTGCTTTGAGCATAACTGAGGCATTAGGTTATT  
CCTGTGACATTGCAGCAGGTCTAGTCTTCTCCATTACATTTGATTGTGCATTTGGATTAAAAACCTGCTAATATATTCATCACA  
GAACAAAATGTTTGC

TROPIDURIDAE 0000010(0 1)(0 1)110000100(0 1)0(1 3)00100(0 1)00101000000100000(0 1)1(0 1)001111021000-0-  
000001001000220000200001(0 1)001(0 1)0010000000110001000001011111000000(0 1)00000000000100100(0 1)10000000(0  
1)00011200000000--0(2 3)101010(0 1)20(0 1)20-0010010010000000-0000200(2 4)0000000000(0 1)00000012000001-  
100011010000010000?00(0 1)11(0 1)?0110000(0 1)1100000??0001000000??1(0 1)0(0 1)1-100?00-0----0000??0?0?0?1?0??  
00????????????(0 1)100010-  
0001000-----  
-----  
-----  
-----  
-----  
-----

CCACTTCATGCTCTTCAACTGCTGAAAAGTCCCTTCTGGCAGGTTACCACGCATTTGAGTGGAAACCACCTTTGAAAAATGTC  
TCCAGTAAACTGAAGTAGGCATTAATGATGGACTTTCAAGCAATCAACATTTGGGTGGATGACTACCCAGTAGACACAATTGCTA  
AGCGATTTGATATGATGCAGCTTTGGTGTGACGCTTAATGGATATGGAAGAAGACATCCTAGAAGGCCTGAAAAGTCAAGGACT  
TGGATGACTACTTAAAGGCCCTTTACTGTAGTATTAAGAAGCCTGTGATGGAATGGGAGATGTGAGTGAAGAACATGGCT  
GTGGCCAGCTGTCCCTGAGAAAGCAGTTCGATTTCTTTCACTCATGAGCATCTCTGTGATGATGACAATGTAAGCATAAG  
GATTTTGAAGAAAACAAGCCCAATTCAGAAGTGTGTTGCAAAACCTTTGTGCCTTATGTTAGCTGATGAATCAGACCATGAAAC  
ACTCACAGCCATCTTGAAGCCCTTGTGGCAGAAAGAGAAGCCATGAAAAATAGTGAAGTACTGATACTTGATGAGCTGGAATCCC  
AAGAACATTCAAATTCATTTTGGGGCAGTGGATATGATGAAAAGCTTGTCCGTGAAGTAGAGGGCCTTGAAGCCTCAGGCTC  
TACTTACATTTGACTTTGTGTGATGCAACACGCTTGGAAAGCATCTCAGAAGTGTATCCTTCAATTCATTAAGGAGTCAATGCT  
GAAAACCTAGAACGATATGAGGTGTGGAGGTCCAACCCCTACCATGAGACTGTTGATGAGCTACGTGACAGAGTGAAGGGAG--  
-----  
-----  
-----  
-----  
-----

TAAGAACCGTCTGGCATCACAGCAGAGTTTCTGGGCTGAATTAACGTTGGCACATCTGGACCATAAGAATGTGGTTTCATATAGT  
AGCTGCTAGCACATGGGCCCTGCCAGCAAGAGAGTTTGGGCACCATAATAATGGAATATGTAGGGAACCACACTGCACC







1100110100000000010011100011010010000200-100(0 1)201000(0 2)10000?20110101111000000001020002?0?????00?????????????01-100010-1000(0 1)00-
TGGAGACGATAGATAAAGATGCCTTTCGTGTGACCCAAAGAGAGAATGAAGCTCACCAAGCAAGGCTGCAGCACCTCTGCCGA
ATCTGTGGAGGTTTCGTTTAAACTGACCCCTATAAGAGAAGCCACCCAGTGCACGGACCAGTGGATAATGTGGTGCAGGCCCTA
CTGAGGAAGAAAGAGAAAAGGGCTACCTCTGGCCAGAACTTCTCTCCAAGGTTTTAAAGATTGATGTGAGAGGAGACATTGA
TACAGTCCATCTACTAATCTTTGTCACTGCTGGAACGTTATTTCAGAGGAAATTCAGCAATGTCCCTGTGAAGTATATTTT
CCAAGGAAAGGCCAGGGAGTGGCATCCCCATTCATCAAACCTGTGATGTTTGCGGCACTTCATCTGTGGGGTCAAGAGAAA
GAAGCAAGCCCTGAATCCACCAGTGCAGCAAAAACTCAGGATCATTGCGAGACATGCGAGACAAATAAGACAAGTCAGAAAC
CCAAACAAATGAACAGTAGAAGTCTTATGAAAAAGATTGCAACTGCAAGAAGATACATCTCAGTACAAAGAGCCTTGCGGT
GGACTATCTGCAAACTTTGTGAAATCGGTTTTCTGCCAGATCTGTGAGCACATCTGGCAGACCCAGTAGAAAACAACATGCAA
GCACGTTTCTGCAGAATTTGCATCCTTAAATGCCTTAAAGTCATGGGAAGTATTGCCCAAGTATTGCCCAAGTATTGCCCTTCA
CTGATCTTGAGAGCCCGTAAAATCTTTCCTGAGCATCTCAACAATTTGGTTGTGAGATGTCTGTGAAAGACTGTGATGAGG
AAATCTCTCTGAAAAATACTGCCATCATCTTCCAGCCACAAAGACGCAAAAGACAAAGAGGGCTATGTGCACATAAACAAA
GGTGGCCGACCAAGACAACACTTACTTTCGTTGACCCGGAGAGCTCAAAAGCACCGCCCTAAGAGAACTCAAGCTTCAAGTGA
AGGCTTTTGTGAGAAAGAAAGAGGGGGAGATTTCAAGTCTGTGTCTAATCTTGTCTCTCTGGCTGTGAGAGCTAGAAAT
GAACACAGACAAGCCGATGAACCTGGAAGATAATGCAAGGAAAGGAAACAGGCCCTTCCAGCTGTTTGTCTGGCAATCCG
AGTCAACACCTTTCTCAGCTGTAGTCACTACCACAAAATGTACAGAACGGTAAAAGCAATAACAGGAAGGCAAAATTTCCAGC
CTTTGCATGCTCTCCGAACCTGCTGAAAAAGCCCTCTGCCGGGTACCATCCATTTGAATGGCAACCACCCTTGAAAAATGTGT
CCAGTAACTGAAGTAGGCATTATAGATGGACTCTCAGGCCTACAACATTTGGTAGATGACTATCCAGTAGACACGATTGCAA
AGAGGTTTCGATTTGATGACCTTTGTAGCTGAAAGGGAGGCCATGAAAGAGATATCTTTGAAGGCTGAAATCTCAAGACTT
GGATGACTATGTGAAAAGGCCCTTACAGTGGTATTAAAGAGTCTGTGATGGAATGGGAGATGTCAGCGAAAAGCATGGCT
GTGGTCCAGCTGTCCCGGAGAAAGCAGTGCATTTCTTTACACCTTATGAGCATCACTGTAGCTCATGACAATGGAAGTATCA
AGATTTTGAAGAAAACAAGCCCAATTCAGAACTGTGTGCAAACTTTGTGCCTGATGCTGGCTGATGAATCAGACCTATGAGA
CCCTCAGCTATTTGAGCCCTTTGTAGCTGAAAGGGAGGCCATGAAAAGCAGTGAATGATACTGAGATGAGATGGGTGAATAC
CCAGAGTATTCAAATTCGATTTAGGGGCACTGGATACGATGAAAAGCTTGTCCGTGAAGTAGAGGGCCTTGAAGCCCTCAGGCT
CTACTTACATATGTACTTTGTGATGCAACACGCCTGGAAGCCTCCAAAACCTGGTCTTCACTCCATAACGAGGAATCATGC
TGAAAACCTTAGACGGGTATGAGATGTGGCGGTCAATCCCTACCATGAGACTGTTGACGAACTACGTGACAGAGTGAAGGGTG
TTTCTGCCAAGCCTTTTACGAACTGTTCTTCAATAGATGCTGTGACATAGGCAATGGTACTGAGTTTACAAGAT
CTTCAATTCGAGATTGGTGAAGTGTACAAAAACCATGATGCATCAAAAGAAAGCGAAAGAGGTTGCAATCAATACTTGACA
AACATCTTAGAAAGAAGATGAGCCTGAAGCCTATAACACGGATGAATGGAATTTTGTAGAAAAGCTCATGAGCAAAGAGACT
GTGGAAGCGGTTTGTGAGCTAATTAAGTGTGAAGAAAGACATGAAGCCCTCAGAGAACTCATGGACCTTTATCTTAAGATGAA
ACCCGTGTGGCGACTCATGCTCCATTAAGAATGCCAGAACTAGTATGCCAGTACAGTTTCAACTCTCAACGGTTTGCAGA
GTTGCTTCCACAAGTTACAGTACAGATATGAGGGCAAGATTACGAATTAATTTTCAAGACTCTTGTCTATGTTCCGGAAT
ATAGAAAAGATGGCTCCATTGGTGTCTGGGCGAGTGAAGGAAATGAATCTGGGAACAAATTTGTTAGGCGAGCAGTAAAGAAC
CGTTTGGCATCGGACAAAGCTTCTGGGACAGAACTAAATGTGGCAGCCCTAATCATAACAATGTGGTACGTGTAATAGCTGCT
AGTGCATGTTCTCTGCCAATCAGGACAGTTTGGGTACCATAATGGAATATGTAGGTAACAGCAGCTTTGCACCATGTTATCTA
TGGACTGGAAGATGATAACAAAAAGGAAGGATGAGGGCTTGGTTGTGGCTGTGAACCTTTGAGATATAACACAATCTCTGAG
CTACTCGTGAACATTGTGGCAGGCTTGGTCTTTCTCCATTCACAATTAATTGTGCATCTGGATTAAAACCTGCCAACATATTC
TCACTGAACAAAATGTTTGCAA

FEYLININAE 1010001000110000010100(1 3)0000100121000(0 1)01020001-----1000100100-1100010-10-
220101021010110001-1--001100011011101121-1211100001000000000200000210-10000000010011200001000011--??-10122?10-021-
000010?100000-101111000000000100000?012001021-??00?1010000?????000010---2-31--0-0-----??-?--1--0000?2011101011?
0000000?1020002?0?????????????????0000111010-100-
0000TGGAGAGAATAGATATCGATGGCTTTCATATGAACCAAAGAGAGAGAGAGGCTCACCAAGCAGCGCTGCTGCTCCTCTGC
CGAATCTGTGGAAGTTCATTTAAACTGACCCCTATAAGAGAAGCACACCCAGTGCATGGACCAGTGATAACCTGTGAGCCCTG
CTACTGAGAAAAGAGAAAAGGGCTACATCTTCCAGGAAACTTCTTGCAAAAGTTTTTAAAGATTGACGTGAGAGGACGCT
TGATACAATGCATCTACTAATCTTTTGTCACTGCTGGAACGTTATTTCAGAGGAAATTCAGCAGTGTCCATGTGAAATGTAT
TTTCCAAGGAAAGACCCCGTTGAGTGGCAGCCCATTCACAAAACCTGTGATGTTTGTGGCAGCTTCTCCCGTGGGGTCAAGAG
AAAGAAGCAAGCCCTGAAATCCACAAGTGTGCAAAAAACTCAGGTTTCAGTGCAAAGATGTGCTAGACAAATGAGACAAGCTAGG
AATCCCAAACAAG-----
TAAGTCTCATGAAAAAGATGGTCAACTGCAAGAAAATACATCTCAGTACAAAGAGCTTTGCAGTGGACTATCTGCAGACTTTG
TGAATCAGTGTCTTGCCGGATCTGTGAGCATATCTGGCAGACCCAGTAGAAAACAACATGCAAGCACTTATTCTGCAGAGTTT
GCATCCTTAAATGCCTTAAAGTAATGGGAAGCTACTGCCCTGTGTGCTGATCTTTCTTCCATCCGATCTGTGAGCCCTGTG
AAATCCTTCCAGGCTTCAACAATTTGGTTGTGAGATGCTGTGAAAGACTGCAATGAGGAAATCCCTCTGGAGAAATAC
TGTCGTCATCGTTCCAGCCACAAAGACGTAAGAGGCAAGAGGGTTATGTGCACATAACAAAGGTGGCCGGCAAGACAAC
ACTTACTTTCTATTGACTCGAAGAGCTCAGAAGCACCCTGAGAGAACTGAAGCTTCAAGTAAAGGCTTTTGTGAGAAAAGAA
GAAGGGGGAGATGTTAAGTCTGTGTCTTACTTTGTCTTCTGCTTTGAGAGCTAGAAATGAACACAGACAAGCCGATGA
ACTGGAAGCTATGATAAGAAAAGAAAGCCGCTCCATCCAGCCGTTTGTGTTGGCAATCCGAGTCCACACTCTCCTCAGCT
GTAGTCAGTATCACAAAATGTACAGGACTGTAAAAGCAATAACAGGAAGACAAATTTTCCAGCCTTTGCATGCTCTCCGAAGCTG
CTGAAAAGGCCCTCTGCCAGGTTACCATCCATTTGAATGGCAACCACCTTTGAGAAATGTGTCCAGTAAACTGAAGTAGGCA
TTATAGATGGACTCTCAGGCCTACAACATTTGGTAGATGACTATCCAGTAGACACAATTGCAAAAGAGGTTTCGGTATGATGCAGC
TTTGGTTTCTGCCCTCATGGATGGAAGAGATATCTCGAAGGGCTGAAATCTCAAGACTTGGGTGATTATGTGAAAGGTTCC
TTCACAGTGGTATCAAAAGAGTCTGTGATGGAATGGGCGATGTCAGCGAAAAGCATGGCTGTGGTCCAGTTGTCCCGAGAA
AGCAGTGCCTTCTTTCACACTTATGAGCATCACTATAGCTCACAGCAATGAAAATATAAGATTTTGAAGAAAACAAGCC
CAATTCAGAACTGTGTGCAAACTTTGTGCCTGATGCTGGCTGACGAGTCAAGACCAGGACCTTCCAGCTATCTTGAGCCC
TCTTGTGGCAGAAAGGGAGGCCATGAAAAGCAGTGAATGATACTTGAGATGGATGGAATCCCAAGGATTTCAAATTCATATT
TAGAGGCACAAAGGATGATGAAAAGCTTGTCCGTGAAGTAGAGGGCTTGAAGCCCTCAGGCTACTTACATATGATGAACTG
TGATGCAACACGCCTGGAAGCCTCGAAGAACTTGATACTTCACTCCATCACGAGGAATCACGCTGAAAACCTCGAGCGGTATG
AGATGTGGCGTCCAATCCTTACCATGAGAGTGTGATGAACTACGTGACAGAGTGAAAGGTTTCTTCCAAGCCTTTTATTG
AAACCCTTCTCGATAGATGCATTGCACTGTGACATTTGGCAACGCTACTGAGTTTATAAGATTTTCAAATTCGAGATTGGTGA
AGTGTTCAAAAGGCTGCTGCATCAAAAGAAAGAGAGTGGTGGCAATCAACTCTTGACAAAACATCTTAGAAAAGAAAGATG
AACCTGAAGCCTGTCACAAGGATGAATGGAATTTTGTGAGAAAAGCTCATGACCAAAAGAGACCGTGGAAAGCGGTTTGTGAACT
AATTAAGTGTGAAGAGAGACATGAAGCCCTCAGAGAACTCATGGACCTTTATCTGAAGATGAAACCCGTGTGGCGATCCTCATG
CCCCACAAAGGAATGCCAGAACTAGTATGCCAGTACAGTTCAACTCTCAACGCTTTGCAGAAATGCTGTCCACAAAAGTTCAG
TTACAGATAGAGGGCAAGGATAACAAATTTTCAAAAACCTTGTCTCAGTCCAGAAATATAGATGAGTCCAGAAATGAGTCCAT
GGTGTCTGGGCAAGCGAAGGAAATGAATCTGGGAACAAAATTTGTTCAGGCGTGCAGTAAAGAACTGTTGGCATCACGACAAAAGC
TTCTGGGCAAGAAATTAATGTGGCAGCCCTTAGTCATAACAATGTGGTACGTGTAATAGCTGCTAGTGCATGTTCTCTGCTATTC





CTGTAGTCAGTACCATAAAATGTACAGGACTGTAAAAGCAATAACAGGAAGACAGATTTTTCAGCCATTGCATGCTCTCCGTAC
AGCTGAAAAGTCCCTTTCGCCAGGTTACCATTCTTGTAGTGGAAACCACCCTTAAAAAATGTGTCCAGCAACACAGAAGTAG
GCATTATAGTGGACTGTGTCAGGCATCCAGCATTTGGTTGATGACTACCCAGTGAACACAATAGCAAAAAGATTTTCGATATGATGC
AGCTTTGGTTTTCTGCCCTAATGGATATGGAAGAAGACATCCTTGAAGGGTTGAAAACTCAGGGCTTGGATGACTATTTGAAAGG
GCCTTTCAGTGTGGTGATTAAGAGTCTGTGATGGTATGGGAGATGTCAGTGAAGCATGGCTGTGGCCAGCTGTCCCTGA
GAAAGCAGTTTCGATTTCTTTACGCTCATGAGCATCACTGTCATGAGAATGGAAACTCAAAGATTTTGAAGAGAATAA
GCCCAATTCAGAGCTGTGTGCAAAACCTTTGTCCCTCATGCTGGCAGATGAATCAGATCATGAGACACTCACAGCCATCTGAG
CCCTTGTGTAGCAGAAAAGAGAGGCCATGAAAAATAGCATAATTGATAATTGATATGGGTGGGATCCCCAGAATGTTCAAATTTGTT
TTCCGTGGCACTGGATACGATGAAAAGCTTCTCCGTGAAAATAGAGGGCCTTGAAGCCTCAGGCTCTACTTACATTTGCACACTT
TGTGATGCAACACGCTTTGAAGCTTCTCGGAATTTGATCCTCCACTCCATAACAAGGAGTCATGCTGAAAACCTAGAACGGTAT
GAGGTATGGCGGTCAAATCCCTACCATGAGACTGTTGATGAACACTACGGGACAGAGTGAAGGGTATATCGCCAAGCCTTTTATT
GAGACTGTTCTTCGATAGATGCGCTACACTGTGACATTGGCAATGCAGCTGAGTTTTACAAGATATTTCAAATTTGAGATTGGCG
AAGTGTACAAAAATTTGATGCATCAAAGAAGAGAGAAAAGAGGTGGCAGTCAACTCTTGATAAGCACCTTAGGAAGGTGATG
AACTTAAAGCTGTAGCAAGGATGAATGGAAATTTTGTAGAAAAGCTCATGACCAAACAGACTGTGGAAGCAGTTTGTGAATT
AATAAAGTGTGATGAGAGACAGGAAGCTCTTAAAGAATCTTGAACCTTTACCTTAAATGAAACCGGTATGGCCTTCTCTCAGT
TCCCACAAAGAATGTCAGAACTAGTATGTCAGTACAGCTTCAAACCTTTTGCAGAGTTTGCAGAGTTTGCACAAAATTCAG
TTACAGATATGAGGGAAAAGATTACAAATTACTTTTATAAACTCTAGCTCATGTTCCAGAAAATAATAGAAAAGAGATGGTTCCATT
GGTGTGTGGCTAGTGAAGGAAATGAATCTGGGAACAAACTGTTACAGCGTGCAGTAAGAACCCTGTGGCATCACGGCAGAG
TTTCTGGGCAGATAAATGCAGCACGCCTTGACCATAGCAATGTGGTACATGTAATAGCTGCAAGTACAAGTGCCCTGCCAAT
CAGGATAGTTTGGGCACCATAAATGGAATATGTAAGTAACAACACTCTGCATCATGTTATCTATGGAACCTGGCTCAATGACAG
CAAAGAGAGAG---ATAAGC-----

TAAGTATAGCTCTGTCTCTGGGCTACTCTGCAACATTTGTGGCAGGCTTAGTGTTCCTCATTACAGTTGATTGTGCATCTGGAT
TTAAAACTGCCAACATACTCATCACTGAACAAAATGTTTGCAA

Blanus 100010000011200010010300000001010-0-03-001-----1000000110-1100010-11013002???-101--?1?----1--
0000?0001000101-0201-013-1?10112210-0--1-?20--11-2-01111?031110001000???????-10121300-01---10000?0?00?
0000101000000000001100001?2201021-??012101110010021?00000011031--1-0-0-1-----2--1-01--0101?20101000-0----110040101??
00010?0?-??0?????????????????01?11??

011-----
-----
-----
-----
-----
-----

CCCTTCTACCAGGTTACCATCCATTTGAGTGGAAACCACCCTTAAAAAATGTGTCCAGCAACACAGAAGTAGGCCATTATAGATG
GACTGTACAGGCATCCAGCATTTGGTTGATGACTACCCAGTGAACACAATAGCAAAAAGATTTTCGATACGATGCAGCTTTGGCTT
CTGCCCTAATGGATATGGAAGAAGACATCCTTGAAGGGCTGAAAACCTCAGGACTTGGATGACTATTTGAAAGGGCCCTTCACTG
TGATGATTAAGAGTCTGTGATGGTATGGGAGATGTTAGCGAAAAGCATGGCTGTGGCCAGCTGTCCCTGAGAAAAGCAGTTTC
GATTTCTCTTACAGTTTCATGAGCATCGTTGTAACCTCATGAAAATGGAACTCAAAGATTTTGAAGAGAACAAGCCCAATTCAG
AGCTGTGCTGCAAAACCTTTGTGCCTCATGTGGCAGATGAATCAGATCATGAGACACTCACAGCCATCCTAAGCCCTTTGTAG
CAGAAAAGAGAGGCCATGAAAAATAGCATAATTGATACTTGTATATGGGTGGGATCCCCAGAATGTTCAAATTTGTTTTTCTGGTAC
TGGATATGATGAAAAGCTTGTCCGTGAAAGTAGAAGGCCTTGAAGCCTCAGGCTCTACTTACATTTGCACACTTTGTGATGCAAC
ACGCCCTCGAAGCTTCTCAGAATTTGATCCTCCACTCCATAACAAGGAGTCACTGTAAGAACTAGAGCGGTATGAGGTATGGCG
GTCAAATCCCTACCATGAGACTGTTGATGAACACTACGGGACAGAGTGAAGGTGATCTGCCAAGCCTTTTATTGAGACTGTGTC
TCTATAGATGCATGCATGCTGTGACATTTGGCAACGCAGCTGAGTTTTACAAGATAITTCAGTTTGAATTTGCGAAGTGTACAA
AAATCCTGATGCATCCAAAGAAGAGAGAAAAAGTGGCAATCAACTCTTGATAAGCACCTTAGGAAGGCAATGAACCTTAAAGC
CTATAACGAGGATGAATGGAAATTTTGTAGAAAAGCTCATGACTAAAAGAGACTGTGGAAGCAGTTTGTGAAATTAATAAAGTGTG
ATGAGAGACAGGAAGCTCTTAGAGAATCTATGGATCTTACCTTAAAGTGAACCAAGTATGGCGTTCTCATGTCCCACCAAGG
AATGTCCGAACTAGTATGTCAGTACAGCTTCAATCTCAAAGTTTGCAGAGTTGCTGTCCACAAAATTCAGTTCACAGATATGA
TGGAAAGATTACAAATTACTTTATAAACTCTAGCTCATGTTCCAGAAAATAATAGAAAAGAGATGGCTCCATTGGTGTCTGGGCA
AGTGAAGGAAATGAATCTGGGAACAAAC-----

TGCAGTAAGAACCCTTGGCATCACGGCAGAGTTTCTGGGCAGAACTAAATGCAGCACGCCTTGACCATAGCAATGTGGTACG
TGTAAATAGTCAAGTCAAGTGCCTTGCCTGCAATCAGGATAGTCTGGGCACCATAAATGGAATATGTAGGTAGCAGCACTCTG
TACCATGTTATCTATGGGACTGGCTCTATGACAACAAAAGAGAGCA---ATAAGA-----

TGAGTATAGCTCTGTCTCTGGGCTACTCTGCAACATTTGTGGCAGGCTTAGTGTTCCTCATTACAGTTGATTGTGCATCTGGAT
TTAAAACTGCCAACATATTCATCACTGAACAAAATGTTTGCAA

AMPHISBAENIDAE 10(0 1)01000001212(0 1)00100113000000010(0 1)0-0-0-03-001-----1000000110-1100010-11(0
1)13002???-101---1?--1--(0 1)110000?0001000101-02111013-1?101(0 1)2210-0--1-?20-11(0 1)-0101111?131110011000--0(0 1)01--101(1
2)1301001---10000?000000-000101000000000001100001-12201021-??01210111001002110002-0012031--1-0-----2--1-2--0(0 1)01?
2010(0 1)010-0----(1 2)10040101?000010?0?-??0?0?10??1?00??0??(0 1)1?11??(0
1)11AACAGGCAAGAGAAAAAATGTTTTCATGTACCCAAAGTGAATTTGAAGCTCACCAAGCAAAAACCTCAGCACCTCTGC
CGTGTCTGTGGAGGCTCATTTAAGACTGAACCATCAAGAAAGAGCTATCCAGTTTCATGGGCCAGTGGATGATGAGACACAAGC
CCTCCTTAGAAAAGAGAGAGAAAAGGGCCACATCCTGGCCTGAACTTCTTGCTAAGGTTTTAAGATTGATGTGAGAGGAGATAT
TGAAACAATTCATCAACTAATTTTGGCAACAATGCTGGAATGTTATGCAAAAGGAAATTCAGCAATTCCTTGCAGAAAGTGTAT
TTCCAAGGAATGATGTGTGGAGTGGCATCCCCATGGATGAAATGTGAGGTTTGTGGCAGTTCTTTCCGTGGGATCAACAGCA
AAGAAGCAAGCTCTGAAATCCACAGCTGAGCAAAAAGGCTCAAAGTTTGTGAGGACATGCTAGACAAAATAGGGCGTGAAGGA
GTACAAAACAATGAACAACAAGAGTTAATGAAAAGATTGCCGACTGCAACAAAATAACACTCAGTACCAAGATCCTTGCA
GTAGACTATCCTGTGGATTTGTAAAAGTCAATTTCTTGCAGGCTGTGAGCACATCCTGGCTGATCCAGTAGAACCAACTTGTA
AGCACTTATTCTGCAGAGCTGCATCCTTAAATGTCTCAAATCATGGGAAGTTACTGCCATCCTGTCACTATCCATGCTTTCTCT
ACTGATCTGGTGTGCTGTGAAATCCTTCCGTGAGCACTCAACAGTTTGGCTGTAAAGATGTTAAGATTGCTAAGATAAGGATTGTCAGGAG
GAGGTCTTCTTGGCAAGTATGGTGCCTATTTCCATCCACAAAAGAGGTTGAGGACAAAAGAGGGCTATGTGATGTAAAACAAA
GGTGGCAGGCCAAGACAACACTTACTTTCAATGACCCGAGAGCACAAAACATCGTCTAAGAGAACTCAAGCTTCAAGTTAA
AGCTTTTGTGTGAGAAAGAAGAAGGGGAGATGTAATAATCTGTGTGGCTAAGTTTGTCTGCTGGCTTGCAGTAGAAAATG
AGCACAGACAAGCTTGTGAAGTGAAGTGAAGTGAAGGATGAGGATCTGGCCTTAGTCCAGCTTTGCTTAGCAGATTCGA
GTCAATACCTTTCTCAGCTGTAGCCAGTACCATAAAATGTATAGGACTGTAAAAGCAATAACAGGAAGACAGATTTTTCAGCCA
CTGCATGCTCTCCGTACAGCTGAAAAGTCCCTTTTGCAGGTTACCATCCATTTGAGTGGAAACCACCCTTAAAAAATGTGTCC



AATACTGCCACCATCTTTCCATCCACAAAAGAGGCCAAAAGCCAAAAGAGGGGTACGTGTACATAAACAAAGGTGGCCGTCCTCAAGA
CAACACTTACTTTTCATTGACCCGGAGACACAAAAGCATCGCTCAAGAGAACTCAAGTTTCAAGTCAAAGCTTTTGCTGAGAA
AGAAGAAGGGGGAGATGTAAAATCTGTGTGTCTAACATTGTTCCTACTGGCTCTGAGAGCTAGAAATGAACACAGCAAGCTG
ATGAGTTGGAAGCTATGATGCAAGGGAAGGGATCAGGCCCTTCATCCGTCTGTTTGCCTGGCAATTCGAGTCAACACCTTTCTTA
GCTGTAGCCAATACCATAAAATGTACAGGACTGTAAAAGCGATAACAGGAAGACAGATTTTCAGCCATTGCATGCTCTCCGAA
CAGCTGAAAAATCCCTCTCCAGGTTACCATCCATTTGAGTGGAAAACACCCTTGAAAAATGTGCCAGTAACACAGAAGTA
GGCATTATAGATGGGCTCTCAGGCATACAGCAGTCGGTTGATGTACTCCCGGTAGACACAATGCGAAAAGATTCGATATGATG
CAGCTTTGGTTTCTGCCCTAATGGATATGGAAGAAGACATCCTTGAAGGGCTGAAAACCTAAAACCTGGATGACTATTTGAAAG
GCCCTTTCACAGTGGTGTCTAAAGAGTCTCGCATGGAATGGGAGATGTCAGTGAAGACGATGGCTGTGGCCACCTGTCCCT
GAGAAAGCTGTTTCGATTCTTTTACACTCATGAGCATCACTGTAGCTCATGACAATGGAAGTGCAAAAGATTTTGAAGAAAAAT
AAGCCCAATTCAGAGTTGTGTTGCAAACCTTTGTGCCTTATGTTGGCTGATGAGTCAGACCATGAAACACTCACAGCCATTCTG
AGCCCTTGTGGCAGAAAAGAGAAGCCATGAAAAACAGTGTATTGATACTTGATATGGGTGGGATCCCAGAATGTTCAAATTT
GTCTTTCGGGGCACTGGATATGATGAAAAGCTTGTCCGTGAAGTAGAGGGCCTTGAAGCCTCAGGCTCCACTTACATCTGCACA
CTTTGTGATGCAACTCGCCTGGAAGCCTCTGAGAACTTGATCCTCCACTCCATAACAAGGAATCATGCTGAAAACCTAGAGCGC
TATGAGGTGTGGAGTGCAGCCCTATCATGAGACTGTTGATGAGCTACGTGACAGAGTGAAGGGTGTATCTGCCAACCTTTT
ATTGAGACTTTCCTTCAATAGATGCATGTGACATTTGGCAATGACAGTTCACCTCAACGTTTTGACAGAGCTGTCTCCAAAAT
GTGAAGTATACAAAATTTCTGATGTATCCAAAAGAAGAGAGAAAAGAGATGGCAATCAACTCTTGATAAACACATTAGAAAGAAG
ATGAACTTAAAGCCTATGACAAGGATGAACGGAAATTTTGCTAGAAAAGCTCATGACCAAAAGAGACTGTGGAAGCAGTTTGTGA
ATTAATAAAGTGTGATGAGAGACAGGAAGCCCTTAGAGAACTCATGGACCTTACCTTAAGATGAAACCAGTATGGCGGTATC
ATGCCCACCAAAGAATGTCCAGAACTAGTATGCCAGTACAGTTCACCTCAACGTTTTGACAGAGCTGTCTCCAAAAT
CAGTTACAGATATGGGGGAAAGATTACAAATTTCTTATAAAAACCTTGTCTCATGTTTCTGAAATATAGAAAGAGATGGTTCC
ATGGTGTCTGGGCAAGTGAAGGAAATGAGTCTGGAAACAAGCTATTACAGCGTGCAGTAAGAACCCTTTGGCATCACGGCAG
AGCTTCTGGGCAGAACTAAATGTGGCATGCCTTGACCATAACAATGTGGTACGTGTTGTAGCTGCTAGCACAGCTGCCCTGCC
AGTCAGGATAAGTTGGGTACCATAAATGGAATATGAGTAATAGCACTCTGCACCATATATCTATGGCACTGGCAGTATGAC
AGCAAAAAGGAAAGATGATGAGC-----
TGAGTATAGCTCGTGTCTGGGCTACTCCTGTAACATTTGGCAGGCTTAGCATTCTCCATTACAGTTGATTGTTTCATCTGGAT
TAAAAACCTGCCAACATATTCATCCGAAACAAAACATTTGCAA

Gallotia 000000111111010001000130000000000000000010000000000001002100000-1110110012-
10101100101001000210110011000100010001110001010110101000000021-0000(0 1)011000100010001020000(0 1)001--00000-
00002020-000001000000000010000000030000000000100000012001111-01002101000010000000011101000000001100(0
1)0000000200000010100?20100000-0-000-0000302000100010?0000000110210001?0011000000000?
1000-----

CCAGATCTTCTGTCTAAGGTTTTTAAGATAGACGTGAGATGCGACATTGACACAACCTATCCTACTAATTTTTGCCACAACCTGCT
GGAATGTATTCAAAGGAAATTCACAATTTCCATGTGAAGAGTATTTCCCAAGGAATGGCACCATGGAATGGCATCCCCATTC
ATCAAGCTGTGAAGTGTGTGGCACTTCTTCTGTGGGGTCAAAAAGAAAGAAGCAAGCCCTGAATCCACAGATGAGCAAAAAAG
CTCAAGATCGTACTGCGCATCTGAGAAAATAAGACTCAAAAGGAATACAAAACAGAGTGAATAAGCAAGGCTTTGATGAAAA
GATTGCCAACTGCAACAAGATACATCTCAGTACTAAGATCCTTGTGTAGATTATCCTATGGACTTTGTAAAGTCAATCTCTTGCC
AGATCTGTGAGCATATCCTGGCTGATCCAGTAGAAAACGACGTGCAGACACTTATCTGCAGAGTCTGCATCCTTAAATGCCTTAA
AGTAATGGGAAGTTATTGCCATCCTGTGCTATCTTGTCTTCTCAGATCTGGTGTAGCCCTGTGAAATCCTTTCTGAGTATCC
TCAAAGTTGGCTGTGAGATGTCAGCAAAAAGGCTGTCTAGGAGTCCCTCTGGGAAAATACTGCCACCATCTTTCCAGCC
ACAAAGAGGTAGAAGACAGAGAGGGGCTATGTGTATGTAACAAGGTGGCCGGCCAAGACAACACTTACTTTCACTGACCCG
GAGAGCACAAAAGCACCCTAAGAGAACTCAAGCTTCAAGTGAAGGCTTTGCTGAGAAAAGAAGAGGGGGAGATGTAAG
GTCTGTGTGTCTAACTTTGTCTACTGGCTCTGAGAGCGAGAAATGAACACAGACAAGCTGATGAGTTGGAAGCTATGATGCA
AGGGAAGGATCAGGCCTTCATCCAGCTGTTGCTTAGCAATTCGGGTCAACACCTTCTCAGCTGTAGCCAATACCATAAAAT
GTACA-----

TGCAGTAAGAACCCTTTGGCATCACGGCAGAGCTTCTGGGCAGAACTAAATGCAGCACGCCTTGATCACCAAAATGTGGTGGC
TATAGTAGCTGCTAGCACATGTGCCCTGGCAATCAGGATAGTTTGGGCACCATAAATGGAATATGTAGGAAATAGCACTCTG
GACCATGTTATCTATGGGACTGGCTGTATAATGGCGAAAAGGAAAGCTGATCAGC-----
TGAGTATAGCTCAGTGTCTGGGCTACTCCTGTGACATTATGGCAGGCTTAGTGTTCCTCATTCACATTTGATTGTGCATCTGGAT
TTGAAACCTGCCAACATATTCATCACTGAACAAAATGTTTGC

Eremias 000000111111010001000130000000000000000010000001000101102100000-1100110012-
00101100101001000210110011000100010001110011010010101000000021-00000011000100010001020000001--00000000002020-
00000100000000001000000030000000000000000012001011-010021010000100000001110100000001100(0 1)000000020000010100?
20100000-0-000-0000302000100011?0010000110210001?0011000000000?100-
TGCAGGCAAGAGATAAAAATGCCTTCTGTGAACCAAGGGAGATTGAAACTACCAAAAGCAAGCTGCAGCACCTTTGTGCG
ATCTGTGGAGGCTCATTTAAGACTGACCCTTGAAGAGAAAGCCACCCAGTCCATGGGCCAGTGGATGATGAGATGCAAGCCCT
TCTGAGAAAAGAGGAGAAAAGGGCGACATCCTGGCCAGATCTTCTTGTAAAGTTTTCAAGATAGACGTGAGAGGTGACATTG
ACACAATCCATCTACTAATTTTGGCCACAACCTGTGGAATGTTGTTCAAAGGAAATTCAGCAATTCCTCATGTAAAGATATT
TCCAAGGAATGGCACCATGGAATGGCATCCCCATTCATCAAGCTGCGAGGTGTGTGGCACTTCTTCCGTGGGGTCAAAAAGAA
AGAAGCAAGCCCTGAATCCACAGATGAGCAAAAAGCTCAGGATCACAGCTGGACGTGCTAGAAAATAAGGCGCATAAGGAA
TAAAACGCGAGTGAACAACAACACTTTAATGAAAAGATTGCCAACTGCAACAAGATAACCTCAGTACCAAGAGCCTTGTCTG
TAGATTCCATCTACTAATTTTGAATAATCGATCTTGTGCCAGTCTGTGAGCATATCCTGGCTGATCCAGTGAAGAAAGGATTT
GCATTTATCTGCAGGGTCTGCATCCTGAAATGCCTCAAAGTGTGGGAAGTTATTGCCATCCTGTGCTACCTTGTCTTCCG
ACAGATCTGGTAAGCCCTGTAAATCCTTCTTGTAGTATCTCAACAGTTTGGCTGTGAGATGTCCAGTGAAGGGGTGTACAGG
GAGGTCCTCTGGGAAAATACTGCCACCATTTCCATCCAAAAGAGGATGAGAAGACAAAAGAGGGCTATGTGTATGTAACAACA
AGGTGGCCGGCAAGACAACATTTACTTTCAATGCCCGGAGACAAAAGACACCGCCTAAGAGAATCAAGACTTCAAGCTG
AAAGCTTTTGTGAGAAAAGAAGAGGGGGAGATGTAAGTCTGTGTGTCTAACTTTGTTCTACTGGCTCTGAGAGCGAGAAA
TGAGCATAGACAAGCCGATGAGTTGGAAGCTATGATGCAAGGGAAGGGATCAGGCCTTACCAGCTGTTTGTCTGGCAATTC



## 5. Morphological Diagnoses and Synapomorphies

In the following we present diagnoses for the nodes *Lacertibaenia*, *Cryptolacerta*/*Amphisbaenia*, *Amphisbaenia*, and *Lacertidae*. All synapomorphies are unequivocal (i.e. present under either type of character optimization) and were derived from PAUP\*<sup>48</sup> after importing the trees generated in the phylogenetic analyses.

*Lacertibaenia* Vidal and Hedges, 2005

Definition: the most recent common ancestor of *Gallotia* and *Amphisbaena*, and all descendants.

Diagnosis: 1) short supratemporal parietal processes (#80-1), which are 2) dorsally flat (#81-1); extensive contact between parietal and supratemporal (#84-1); 3) broad articulation between vomer and palatine (#108-0); 4) lateral exposure of the ectopterygoid (#126-1); 5) presence of spheno-occipital epiphyses (#128-1); 6) reduced crista prootica (#138-1); 7) posterodorsally inclined crista tuberalis (#151-1); 8) ventral exposure of the occipital recess (#155-1); 9) flat ventral margin of the coronoid (#195-0); 10) cervical intercentra being fused to the posterior part of the preceding centrum (#243-2); 11) absence of epicoracoid cartilage (#264-1).

*Cryptolacerta* + *Amphisbaenia*

Definition: the most recent common ancestor of *Cryptolacerta* and *Amphisbaenia*, and all descendants.

Diagnosis: 1) postorbital skull at least half as long as remaining skull (#1-1); 2) blunt and rounded snout #3-1); 3) sutural contact between prefrontal and postorbitofrontal (#37-2); 4)



contact between prefrontal and jugal (#39-1); 5) absence of a lacrimal (#41-3); 6) little angulated, curved jugal (#47-1); 7) subequal width of the anterior and posterior borders of the frontal (#57-0); 8) lack of frontal constriction between the orbits (#58-0); lack of a tympanic crest (#162-1); 9) absence of well developed neural spines (#232-2); 10) presence of 7 or fewer cervical vertebrae (#242-1); 11) rod-like clavicles (#260-0); 12) absence of an anterior coracoid emargination (#262-0); 13) absence of interclavicle (#268-1); 14) fusion of cephalic scales (#302-1; although this is a soft part character, the scute impressions on the skull roof of *Cryptolacerta* indicate scale fusion); 15) frontal subolfactory processes transversely widened (#356-1); 16) increased thickness and density of frontal bone (#358-1); 17) increased thickness and density of maxillary bone (#359-1); 18) orbits reduced in size (#363-1); 19) vertical tongue-and-groove articulation between the frontals (#364-1).

*Amphisbaenia* Gray, 1844

Definition: the most recent common ancestor of *Amphisbaena* and *Rhineura*, and all descendants.

Diagnosis: 1) partial surrounding of the olfactory tracts by the frontal subolfactory processes (#61-1); 2) absence of a pineal foramen (#77-3); 3) absence of parietal supratemporal processes (#80-2); 4) bony contact between parietal and supraoccipital (#85-1); 5) absence of a supratemporal (#87-1); 6) absence of a forking of the medial surface of the postorbital/postfrontal (#89-0); 7) absence of a complete supratemporal arch (#99-1); 8) absence of a crista prootica (#132-2); 9) absence of the epipterygoid (#134-1); 10) otooccipital suspension of the quadrate (#159-3); 11) absence of a mandibular adductor fossa expansion (#169-0); 12) absence of a posterior mylohyoid foramen (#175-1); 13) posterior extension of the dentary beyond the midpoint of the mandible (#180-1); 14) closure of Meckel's canal (#181-2); 15) absence of a dentary subdental shelf (#182-1); 16) absence of an

anterior inferior alveolar foramen (#183-3); 17) absence of a dorsal fossa on the retroarticular process (#208-1); 18) presence of a torsion of the retroarticular process (#210-1); 19) straight and pointed middle and posterior marginal teeth (#212-0); 20) presence of an enlarged median premaxillary tooth (#222-1); 21) absence of functional sacral vertebrae (#247-1); 22) presence of lymapophyses in the cloacal vertebrae (#248-1); 23) ribs with an anteroventral pseudotuberculum (#255-1).

Lacertidae Bonaparte, 1831

Definition: the most recent common ancestor of *Gallotia* and *Eremias*, and all descendants.

Diagnosis: 1) bilobed premaxillary incisive process (#14-1); 2) presence of a palpebral bone (#101-1); 3) presence of a secondary palate around the choanal groove (#114-1); 4) presence of a midline contact between the vomers (#120-0); 5) long splenial (#189-0); 6) presence of 26 presacral vertebrae (#236-1); 7) presence of a sternal fontanelle (#273-1); 8) presence of an ilium anterior process (#287-0); 9) division of the foretongue by more than 40% of its length (#317-3); 10) presence of an expanded anterior head of the M. pseudotemporalis profundus (#340-2).

## 6. Principal Components Analysis of Ecomorphology

We inferred the habits of *Cryptolacerta* based on PCA of seven measured variables in extant squamates from [19], Table 1, using PAST ver. 1.98<sup>49</sup>. We excluded a single measured variable (tail length) from [19] because it was not preserved in *Cryptolacerta*, and excluded elongate, limbless taxa from the analysis since that body plan disproportionately drove most of the variation seen in the original study. Squamate taxa possessing ecological habits consistent with the paleoenvironments of the Grube Messel locality were projected into the resulting morphospace, along with *Cryptolacerta* for comparison (although we included sand and grass swimmers in the PCA, we did not compare them to *Cryptolacerta*).

**Table 1. Taxa, variables, and ecology used in PCA analysis.** SVL= Snout Vent Length; HW= Head Width; SE= Snout –Eye distance; FLL=Forelimb Length; HLL= Hindlimb Length. Measurements are in mm.

| Species                        | SVL   | HW   | SE   | FLL  | HLL   | Fingers | Toes | Ecology                           |
|--------------------------------|-------|------|------|------|-------|---------|------|-----------------------------------|
| <i>Abronia graminea</i>        | 96.2  | 13.2 | 13.1 | 22.9 | 30.5  | 5.0     | 5.0  | arboreal                          |
| <i>Gecko gekko</i>             | 146.2 | 28.2 | 25.7 | 37.1 | 44.3  | 5.0     | 5.0  | arboreal                          |
| <i>Gonatodes albogularis</i>   | 39.2  | 5.7  | 6.8  | 12.1 | 17.0  | 5.0     | 5.0  | arboreal                          |
| <i>Calotes versicolor</i>      | 83.5  | 13.7 | 14.1 | 39.6 | 61.9  | 5.0     | 5.0  | arboreal                          |
| <i>Polychrus marmoratus</i>    | 129.3 | 18.2 | 19.4 | 42.2 | 54.0  | 5.0     | 5.0  | arboreal                          |
| <i>Takydromus smaragdinus</i>  | 48.2  | 5.5  | 7.7  | 17.2 | 23.8  | 5.0     | 5.0  | arboreal, grass-swimming          |
| <i>Basiliscus basiliscus</i>   | 163.9 | 25.8 | 30.2 | 64.9 | 138.9 | 5.0     | 5.0  | arboreal, semi-aquatic            |
| <i>Enyalioides laticeps</i>    | 112.1 | 21.9 | 22.0 | 53.3 | 89.4  | 5.0     | 5.0  | arboreal, terrestrial             |
| <i>Placosoma glabellum</i>     | 53.1  | 5.8  | 7.4  | 14.7 | 19.9  | 5.0     | 5.0  | arboreal, terrestrial leaf-litter |
| <i>Eumeces laticeps</i>        | 109.7 | 10.9 | 15.7 | 33.9 | 46.5  | 5.0     | 5.0  | arboreal?                         |
| <i>Gerrhonotus liocephalus</i> | 131.7 | 14.8 | 15.4 | 24.0 | 28.4  | 5.0     | 5.0  | arboreal, terrestrial             |
| <i>Cercosaura argulus</i>      | 42.1  | 5.6  | 7.2  | 14.1 | 18.7  | 5.0     | 5.0  | arboreal, terrestrial             |
| <i>Cercosaura ocellata</i>     | 48.7  | 6.2  | 7.3  | 16.6 | 23.9  | 5.0     | 5.0  | arboreal, terrestrial             |
| <i>Eumeces fasciatus</i>       | 66.7  | 6.9  | 9.0  | 19.5 | 27.1  | 5.0     | 5.0  | arboreal, terrestrial             |
| <i>Eumeces inexpectatus</i>    | 71.6  | 6.9  | 9.6  | 20.8 | 29.3  | 5.0     | 5.0  | arboreal, terrestrial             |

|                                       |       |      |      |      |      |     |     |                        |
|---------------------------------------|-------|------|------|------|------|-----|-----|------------------------|
| <i>Diplodactylus damaeus</i>          | 50.4  | 7.4  | 8.6  | 14.2 | 20.6 | 5.0 | 5.0 | arboreal, terrestrial  |
| <i>Amphiglossus macrocercus</i>       | 68.7  | 6.2  | 7.7  | 15.1 | 22.7 | 5.0 | 5.0 | arboreal, terrestrial? |
| <i>Alopoglossus carinicaudatus</i>    | 54.9  | 7.2  | 7.8  | 14.3 | 22.2 | 5.0 | 5.0 | as per congeners       |
| <i>Colobodactylus tanuayi</i>         | 51.8  | 5.6  | 5.9  | 9.7  | 17.5 | 4.8 | 5.0 | as per congeners       |
| <i>Bipes biporus</i>                  | 167.2 | 4.3  | 3.6  | 6.1  | 0.0  | 5.0 | 0.0 | burrowing              |
| <i>Bipes canaliculatus</i>            | 182.5 | 5.4  | 4.5  | 6.5  | 0.0  | 4.0 | 0.0 | burrowing              |
| <i>Bipes tridactylus</i>              | 127.5 | 5.1  | 3.7  | 6.0  | 0.0  | 3.0 | 0.0 | burrowing              |
| <i>Dibamus novaeguineae</i>           | 128.3 | 2.9  | 2.6  | 0.0  | 1.1  | 0.0 | 0.4 | burrowing              |
| <i>Calyptommatius leiolepis</i>       | 53.3  | 3.1  | 3.3  | 0.0  | 3.3  | 0.0 | 1.0 | BURROWING              |
| <i>Calyptommatius nicterus</i>        | 60.7  | 3.5  | 3.4  | 0.0  | 3.2  | 0.0 | 1.0 | BURROWING              |
| <i>Calyptommatius sinebrachiatus</i>  | 57.5  | 3.3  | 3.4  | 0.0  | 2.8  | 0.0 | 1.0 | BURROWING              |
| <i>Notobachia ablephara</i>           | 52.4  | 2.7  | 3.3  | 1.1  | 5.5  | 1.0 | 2.0 | burrowing              |
| <i>Procellosaurinus erythrocerus</i>  | 27.5  | 3.2  | 3.3  | 5.8  | 9.8  | 4.0 | 5.0 | burrowing              |
| <i>Procellosaurinus tetradactylus</i> | 26.0  | 2.8  | 3.1  | 5.3  | 9.4  | 4.0 | 5.0 | burrowing              |
| <i>Psilophthalmus paeminosus</i>      | 32.0  | 2.9  | 3.2  | 4.0  | 7.5  | 4.0 | 5.0 | burrowing              |
| <i>Brachymeles gracilis</i>           | 75.0  | 5.5  | 6.2  | 8.3  | 13.8 | 5.0 | 5.0 | burrowing              |
| <i>Brachymeles talinis</i>            | 108.4 | 7.7  | 8.5  | 12.5 | 20.9 | 5.0 | 5.0 | burrowing              |
| <i>Proscelotes eggeli</i>             | 87.0  | 5.9  | 6.3  | 8.4  | 12.5 | 5.0 | 5.0 | burrowing              |
| <i>Pygomeles braconnieri</i>          | 139.1 | 5.6  | 7.4  | 0.0  | 3.5  | 0.0 | 1.0 | burrowing              |
| <i>Scelotes bipes</i>                 | 47.9  | 2.5  | 3.0  | 0.0  | 3.1  | 0.0 | 2.0 | burrowing              |
| <i>Scelotes gronovi</i>               | 67.4  | 2.6  | 3.8  | 0.0  | 3.1  | 0.0 | 1.0 | burrowing              |
| <i>Scelotes sexlineatus</i>           | 75.7  | 3.2  | 4.5  | 0.0  | 8.9  | 0.0 | 2.0 | burrowing              |
| <i>Voeltzkowia fierinensis</i>        | 57.4  | 2.1  | 3.0  | 0.0  | 3.6  | 0.0 | 2.0 | burrowing              |
| <i>Neoseps reynoldsi</i>              | 54.0  | 2.6  | 4.2  | 2.0  | 6.6  | 1.1 | 2.0 | burrowing              |
| <i>Bachia bresslaui</i>               | 98.6  | 5.7  | 6.1  | 2.7  | 3.0  | 1.0 | 1.0 | BURROWING (for genus)  |
| <i>Bachia dorbignyi</i>               | 63.2  | 3.4  | 3.4  | 2.2  | 0.8  | 3.0 | 1.0 | BURROWING (for genus)  |
| <i>Bachia flavescens</i>              | 65.8  | 3.4  | 3.9  | 1.9  | 1.8  | 1.0 | 1.0 | BURROWING (for genus)  |
| <i>Scincopus fasciatus</i>            | 150.5 | 18.6 | 21.9 | 43.9 | 47.7 | 5.0 | 5.0 | burrowing in sand      |
| <i>Scincus scincus</i>                | 117.2 | 9.8  | 16.6 | 31.6 | 37.7 | 5.0 | 5.0 | burrowing in sand      |
| <i>Sphenops boulengeri</i>            | 83.9  | 4.3  | 6.3  | 7.5  | 17.7 | 4.8 | 5.0 | burrowing in sand      |
| <i>Sphenops</i>                       | 98.3  | 3.9  | 6.9  | 4.4  | 15.8 | 2.0 | 4.0 | burrowing in sand      |

|                                      |       |      |      |      |      |     |     |                                           |
|--------------------------------------|-------|------|------|------|------|-----|-----|-------------------------------------------|
| <i>sphenopsiformis</i>               |       |      |      |      |      |     |     |                                           |
| <i>Chalcides mionecton</i>           | 86.8  | 4.8  | 6.5  | 6.5  | 15.1 | 4.0 | 4.0 | burrowing, cryptic leaf litter, burrowing |
| <i>Sepsina angolensis</i>            | 71.1  | 3.7  | 4.1  | 2.4  | 7.4  | 3.0 | 3.0 | burrowing                                 |
| <i>Cordylus cataphractus</i>         | 89.0  | 17.3 | 15.1 | 29.8 | 39.4 | 5.0 | 5.0 | saxicolous                                |
| <i>Cordylus cordylus</i>             | 82.4  | 14.0 | 13.1 | 26.8 | 39.1 | 5.0 | 5.0 | saxicolous                                |
| <i>Cordylus jordani</i>              | 93.6  | 16.7 | 14.7 | 32.9 | 46.0 | 5.0 | 5.0 | saxicolous                                |
| <i>Cordylus warreni</i>              | 108.6 | 19.0 | 17.5 | 34.1 | 50.3 | 5.0 | 5.0 | saxicolous                                |
| <i>Platysaurus rhodesianus</i>       | 97.3  | 13.6 | 14.7 | 37.3 | 51.4 | 5.0 | 5.0 | saxicolous                                |
| <i>Pseudocordylus microlepidotus</i> | 122.4 | 20.9 | 20.3 | 40.3 | 57.2 | 5.0 | 5.0 | saxicolous                                |
| <i>Oedura coggeri</i>                | 71.3  | 12.3 | 11.9 | 17.1 | 21.1 | 5.0 | 5.0 | saxicolous, arboreal                      |
| <i>Urosaurus ornatus</i>             | 48.9  | 7.9  | 7.7  | 17.2 | 26.5 | 5.0 | 5.0 | saxicolous, arboreal                      |
| <i>Amphiglossus astrolabi</i>        | 190.5 | 14.0 | 17.9 | 32.6 | 44.7 | 5.0 | 5.0 | semi-aquatic                              |
| <i>Neusticurus ecpleopus</i>         | 59.7  | 7.7  | 8.4  | 17.2 | 27.1 | 5.0 | 5.0 | semi-aquatic                              |
| <i>Neusticurus rudis</i>             | 72.5  | 9.0  | 11.5 | 22.6 | 34.7 | 5.0 | 5.0 | semi-aquatic (for genus)                  |
| <i>Lanthanotus borneensis</i>        | 169.0 | 14.6 | 13.3 | 26.1 | 33.0 | 5.0 | 5.0 | semi-aquatic, burrowing                   |
| <i>Barisia imbricata</i>             | 110.3 | 14.4 | 13.8 | 22.0 | 28.0 | 5.0 | 5.0 | terrestrial                               |
| <i>Celestus enneagrammus</i>         | 72.6  | 7.1  | 7.3  | 11.0 | 16.1 | 5.0 | 5.0 | terrestrial                               |
| <i>Diploglossus pleei</i>            | 87.2  | 8.4  | 7.8  | 9.6  | 15.3 | 5.0 | 5.0 | terrestrial                               |
| <i>Elgaria coerulea</i>              | 86.5  | 10.9 | 11.4 | 19.8 | 27.3 | 5.0 | 5.0 | terrestrial                               |
| <i>Elgaria kingii</i>                | 79.6  | 8.6  | 9.3  | 14.2 | 19.1 | 5.0 | 5.0 | terrestrial                               |
| <i>Elgaria multicarinata</i>         | 110.4 | 12.4 | 13.5 | 25.5 | 32.0 | 5.0 | 5.0 | terrestrial                               |
| <i>Elgaria panamintina</i>           | 109.9 | 12.5 | 13.2 | 24.6 | 31.1 | 5.0 | 5.0 | terrestrial                               |
| <i>Elgaria paucicarinata</i>         | 87.6  | 10.2 | 11.0 | 16.2 | 23.3 | 5.0 | 5.0 | terrestrial                               |
| <i>Mesaspis moreleti</i>             | 66.8  | 8.2  | 8.2  | 15.1 | 19.0 | 5.0 | 5.0 | terrestrial                               |
| <i>Sauresia agasepsoides</i>         | 60.0  | 4.3  | 4.0  | 3.4  | 6.8  | 4.0 | 4.0 | terrestrial                               |
| <i>Wetmorena haetiana</i>            | 68.7  | 6.4  | 6.2  | 6.9  | 11.1 | 4.0 | 4.0 | terrestrial                               |
| <i>Coleonyx elegans</i>              | 76.9  | 11.1 | 12.9 | 24.7 | 31.0 | 5.0 | 5.0 | terrestrial                               |
| <i>Gerrhosaurus major</i>            | 210.3 | 28.8 | 27.5 | 51.1 | 71.0 | 5.0 | 5.0 | terrestrial                               |
| <i>Gerrhosaurus nigrolineatus</i>    | 96.8  | 12.1 | 14.2 | 22.9 | 43.5 | 5.0 | 5.0 | terrestrial                               |
| <i>Cercosaura eigenmanni</i>         | 40.8  | 5.4  | 6.7  | 13.1 | 17.9 | 5.0 | 5.0 | terrestrial                               |
| <i>Pholidobolus montium</i>          | 50.9  | 5.8  | 6.4  | 14.3 | 22.2 | 5.0 | 5.0 | terrestrial                               |

|                                         |       |      |      |      |       |     |     |                                      |
|-----------------------------------------|-------|------|------|------|-------|-----|-----|--------------------------------------|
| <i>Ptychoglossus brevifrontalis</i>     | 51.9  | 6.1  | 6.4  | 10.4 | 18.5  | 5.0 | 5.0 | terrestrial                          |
| <i>Vanzosaura rubricauda</i>            | 29.6  | 3.0  | 3.4  | 5.4  | 9.9   | 4.0 | 5.0 | terrestrial                          |
| <i>Dipsosaurus dorsalis</i>             | 123.1 | 17.8 | 16.2 | 41.6 | 79.7  | 5.0 | 5.0 | terrestrial                          |
| <i>Gambelia wislizenii</i>              | 100.2 | 16.5 | 17.0 | 36.6 | 69.6  | 5.0 | 5.0 | terrestrial                          |
| <i>Leiocephalus carinatus</i>           | 108.1 | 17.6 | 17.1 | 38.3 | 65.2  | 5.0 | 5.0 | terrestrial                          |
| <i>Meroles cuneirostris</i>             | 50.9  | 9.1  | 10.2 | 17.9 | 38.1  | 5.0 | 5.0 | terrestrial                          |
| <i>Psammodromus hispanicus</i>          | 37.5  | 5.5  | 6.5  | 12.8 | 21.4  | 5.0 | 5.0 | terrestrial                          |
| <i>Amphiglossus igneocaudatus</i>       | 52.8  | 3.6  | 5.3  | 7.0  | 16.4  | 5.0 | 5.0 | terrestrial                          |
| <i>Gongylomorphus bojeri</i>            | 47.0  | 4.8  | 6.6  | 12.2 | 19.9  | 5.0 | 5.0 | terrestrial                          |
| <i>Ameiva ameiva</i>                    | 191.3 | 27.5 | 36.4 | 61.4 | 123.2 | 5.0 | 5.0 | terrestrial                          |
| <i>Dicrodon guttulatum</i>              | 120.1 | 17.3 | 21.4 | 40.1 | 82.5  | 5.0 | 5.0 | terrestrial                          |
| <i>Teius teyou</i>                      | 115.6 | 14.2 | 19.2 | 34.4 | 72.4  | 5.0 | 4.0 | terrestrial                          |
| <i>Varanus griseus</i>                  | 303.5 | 32.9 | 37.1 | 73.9 | 90.4  | 5.0 | 5.0 | terrestrial                          |
| <i>Xantusia vigilis</i>                 | 39.7  | 5.1  | 5.0  | 10.1 | 14.0  | 5.0 | 5.0 | terrestrial                          |
| <i>Cnemidophorus sexlineatus</i>        | 63.9  | 8.7  | 11.0 | 20.7 | 41.8  | 5.0 | 5.0 | terrestrial                          |
| <i>Eumeces longirostris</i>             | 66.1  | 6.7  | 10.0 | 21.8 | 31.8  | 5.0 | 5.0 | terrestrial                          |
| <i>Eumeces schwartzei</i>               | 108.1 | 8.9  | 12.4 | 27.1 | 37.0  | 5.0 | 5.0 | terrestrial                          |
| <i>Tracheloptychus madagascariensis</i> | 55.4  | 8.3  | 9.2  | 17.8 | 38.6  | 5.0 | 5.0 | terrestrial                          |
| <i>Zonosaurus ornatus</i>               | 121.5 | 16.3 | 16.6 | 25.9 | 47.9  | 5.0 | 5.0 | terrestrial                          |
| <i>Cercosaura quadrilineatus</i>        | 39.9  | 4.7  | 5.1  | 10.6 | 13.9  | 5.0 | 5.0 | terrestrial as per congeners         |
| <i>Proctoporus bolivianus</i>           | 57.0  | 6.5  | 6.7  | 13.3 | 19.4  | 5.0 | 5.0 | terrestrial as per congeners         |
| <i>Proctoporus simoterus</i>            | 64.5  | 6.5  | 6.8  | 12.0 | 15.5  | 5.0 | 5.0 | terrestrial as per congeners         |
| <i>Amphiglossus melanopleura</i>        | 43.7  | 4.0  | 4.5  | 7.4  | 13.3  | 5.0 | 5.0 | terrestrial (leaf-litter)            |
| <i>Amphiglossus melanurus</i>           | 65.2  | 4.7  | 5.7  | 9.0  | 14.9  | 5.0 | 5.0 | terrestrial (leaf-litter)            |
| <i>Amphiglossus ornaticeps</i>          | 55.0  | 3.6  | 4.1  | 4.3  | 7.8   | 5.0 | 5.0 | terrestrial (leaf-litter)            |
| <i>Amphiglossus punctatus</i>           | 60.7  | 5.1  | 6.6  | 13.2 | 19.4  | 5.0 | 5.0 | terrestrial (leaf-litter); arboreal? |
| <i>Amphiglossus intermedius</i>         | 68.0  | 4.7  | 5.3  | 9.3  | 18.3  | 5.0 | 5.0 | terrestrial (leaf-litter); for genus |
| <i>Amphiglossus stumpffi</i>            | 86.9  | 5.5  | 6.3  | 12.7 | 21.6  | 5.0 | 5.0 | terrestrial (leaf-litter); for genus |
| <i>Amphiglossus</i>                     | 84.1  | 6.8  | 7.5  | 11.9 | 17.8  | 5.0 | 5.0 | terrestrial (leaf-                   |

|                                   |       |      |      |      |      |     |     |                                             |
|-----------------------------------|-------|------|------|------|------|-----|-----|---------------------------------------------|
| <i>tsaratananensis</i>            |       |      |      |      |      |     |     | litter); for genus                          |
| <i>Amphiglossus waterlotti</i>    | 121.0 | 9.4  | 13.1 | 23.7 | 31.4 | 5.0 | 5.0 | terrestrial (leaf-litter); for genus        |
| <i>Scelotes mirus</i>             | 75.3  | 4.0  | 4.7  | 5.9  | 11.5 | 5.0 | 5.0 | terrestrial, among grass                    |
| <i>Diploglossus bilobatus</i>     | 70.3  | 7.9  | 7.5  | 10.7 | 16.2 | 5.0 | 5.0 | terrestrial "semi-fossorial"                |
| <i>Teratoscincus scincus</i>      | 96.7  | 19.5 | 17.4 | 32.8 | 44.5 | 5.0 | 5.0 | terrestrial, burrowing                      |
| <i>Angolossaurus skoogi</i>       | 132.4 | 15.2 | 17.1 | 38.0 | 53.8 | 5.0 | 5.0 | terrestrial, BURROWING                      |
| <i>Leiolepis belliana</i>         | 120.9 | 16.8 | 16.8 | 38.7 | 72.6 | 5.0 | 5.0 | terrestrial, burrowing                      |
| <i>Phrynocephalus versicolor</i>  | 52.4  | 10.7 | 8.3  | 22.0 | 36.6 | 5.0 | 5.0 | terrestrial, burrowing                      |
| <i>Chalcides ocellatus</i>        | 119.5 | 8.7  | 11.4 | 22.2 | 30.3 | 5.0 | 5.0 | terrestrial, burrowing                      |
| <i>Sphenodon punctatus</i>        | 216.7 | 35.5 | 36.4 | 62.9 | 87.0 | 5.0 | 5.0 | terrestrial, burrowing                      |
| <i>Heloderma suspectum</i>        | 300.3 | 39.6 | 29.3 | 75.2 | 82.1 | 5.0 | 5.0 | terrestrial, climbing, digging              |
| <i>Chalcides polylepis</i>        | 109.3 | 7.6  | 10.3 | 21.2 | 29.0 | 5.0 | 5.0 | terrestrial, cryptic                        |
| <i>Eumeces schneideri</i>         | 126.5 | 10.4 | 14.2 | 33.0 | 46.9 | 5.0 | 5.0 | terrestrial, cryptic                        |
| <i>Scelotes caffer</i>            | 46.7  | 2.8  | 2.8  | 2.8  | 8.5  | 3.0 | 3.0 | terrestrial, cryptic                        |
| <i>Lepidophyma flavimaculatum</i> | 85.7  | 9.5  | 10.8 | 26.3 | 34.7 | 5.0 | 5.0 | terrestrial, cryptic                        |
| <i>Eumeces obsoletus</i>          | 105.7 | 9.4  | 12.7 | 27.7 | 34.8 | 5.0 | 5.0 | terrestrial, cryptic                        |
| <i>Chalcides chalcides</i>        | 136.0 | 5.7  | 7.5  | 5.6  | 8.3  | 3.0 | 3.0 | terrestrial, cryptic, "grass-swimming"?     |
| <i>Eumeces egregius</i>           | 47.0  | 3.5  | 4.9  | 8.8  | 13.3 | 5.0 | 5.0 | terrestrial, cryptic, burrowing             |
| <i>Scelotes kasneri</i>           | 64.8  | 2.9  | 4.4  | 0.0  | 6.6  | 0.0 | 2.0 | terrestrial, cryptic, burrowing?            |
| <i>Alopoglossus atriventris</i>   | 45.4  | 6.3  | 7.2  | 13.8 | 21.1 | 5.0 | 5.0 | terrestrial, leaf litter                    |
| <i>Alopoglossus copii</i>         | 51.6  | 7.2  | 7.6  | 14.9 | 25.5 | 5.0 | 5.0 | terrestrial, leaf litter                    |
| <i>Iphisa elegans</i>             | 54.7  | 6.0  | 6.3  | 9.6  | 16.6 | 5.0 | 5.0 | terrestrial, leaf litter                    |
| <i>Gymnophthalmus leucomystax</i> | 36.4  | 3.7  | 4.0  | 8.1  | 9.6  | 4.0 | 5.0 | terrestrial, leaf litter (for G. speciosus) |
| <i>Leposoma percarinatum</i>      | 34.7  | 4.3  | 4.9  | 10.0 | 12.6 | 5.0 | 5.0 | terrestrial, leaf litter (for L. southi)    |
| <i>Heterodactylus imbricatus</i>  | 87.6  | 7.5  | 7.9  | 11.5 | 22.6 | 4.8 | 5.0 | terrestrial, leaf-litter (burrows?)         |
| <i>Cercosaura schreibersi</i>     | 39.8  | 4.7  | 5.3  | 10.7 | 13.9 | 5.0 | 5.0 | terrestrial, leaf-litter, grass clumps      |

|                                    |       |      |      |      |      |     |     |                                        |
|------------------------------------|-------|------|------|------|------|-----|-----|----------------------------------------|
| <i>Micrablepharus maximiliani</i>  | 39.2  | 4.5  | 5.0  | 9.8  | 15.0 | 4.0 | 5.0 | terrestrial, grass clumps, leaf litter |
| <i>Chaemasaura anguina</i>         | 121.6 | 6.8  | 9.3  | 3.9  | 7.2  | 1.0 | 1.0 | terrestrial, grass-swimming            |
| <i>Tetradactylus africanus</i>     | 86.3  | 6.3  | 7.7  | 1.3  | 3.9  | 1.0 | 1.0 | terrestrial, grass-swimming            |
| <i>Tetradactylus seps</i>          | 51.6  | 5.3  | 6.0  | 9.3  | 17.0 | 5.0 | 5.0 | terrestrial, grass-swimming            |
| <i>Tetradactylus tetradactylus</i> | 66.2  | 4.9  | 5.8  | 6.1  | 7.5  | 4.0 | 4.0 | terrestrial, grass-swimming            |
| <i>Cordylosaurus trivittata</i>    | 41.0  | 4.5  | 5.0  | 9.4  | 14.8 | 5.0 | 5.0 | terrestrial, saxicolous                |
| <i>Xenosaurus grandis</i>          | 100.5 | 16.3 | 14.9 | 30.7 | 37.8 | 5.0 | 5.0 | terrestrial, saxicolous                |
| <i>Podarcis sicula</i>             | 71.4  | 8.6  | 9.9  | 19.5 | 32.1 | 5.0 | 5.0 | terrestrial, saxicolous, arboreal      |
| <i>Shinisaurus crocodilurus</i>    | 135.5 | 18.2 | 18.5 | 40.7 | 48.9 | 5.0 | 5.0 | terrestrial, semi-aquatic              |
| <i>Arthrosaura reticulata</i>      | 59.1  | 7.1  | 7.8  | 15.1 | 25.3 | 5.0 | 5.0 | terrestrial, semi-aquatic, leaf litter |
| <i>Amphiglossus mouroundavae</i>   | 57.9  | 4.9  | 6.1  | 13.2 | 19.4 | 5.0 | 5.0 | terrestrial, under cover               |
| <i>Colobodactylus dalcyanus</i>    | 38.5  | 4.2  | 4.4  | 7.6  | 11.1 | 4.0 | 5.0 | under rocks (terrestrial)              |
| <i>Talpalactera hassicaa</i>       | 71.7  | 8.4  | 9.4  | 14.2 | 18.4 | 5.0 | 5.0 |                                        |

**Table SX. Taxa and PCA scores.**

| Species                            | PC 1    | PC 2   | PC 3   | PC 4   | PC 5  | PC 6  | PC 7  |
|------------------------------------|---------|--------|--------|--------|-------|-------|-------|
| <i>Abronia graminea</i>            | -11.40  | -0.38  | 3.50   | -1.59  | -0.69 | 0.18  | 0.05  |
| <i>Gecko gekko</i>                 | -67.39  | 2.36   | 11.04  | -10.26 | -1.73 | 0.02  | 0.47  |
| <i>Gonatodes albogularis</i>       | 48.22   | -9.65  | 2.96   | -0.02  | -0.26 | -0.42 | 0.25  |
| <i>Calotes versicolor</i>          | -15.49  | -37.28 | 0.53   | 3.71   | 2.74  | 0.73  | 0.07  |
| <i>Polychrus marmoratus</i>        | -55.16  | -12.73 | 5.77   | 1.12   | 1.36  | -0.93 | 0.05  |
| <i>Takydromus smaragdinus</i>      | 36.50   | -12.96 | 2.49   | 2.12   | 0.46  | -0.97 | 0.18  |
| <i>Basiliscus basiliscus</i>       | -123.42 | -74.35 | -19.39 | -0.03  | 0.76  | 0.93  | 0.18  |
| <i>Enyalioides laticeps</i>        | -55.81  | -53.18 | -1.32  | 0.68   | 2.75  | 1.04  | 0.27  |
| <i>Placosoma glabellum</i>         | 34.14   | -6.73  | 2.41   | 1.25   | -0.11 | -0.60 | 0.13  |
| <i>Eumeces laticeps</i>            | -31.77  | -11.11 | 1.66   | 3.71   | 0.75  | -2.59 | 0.04  |
| <i>Gerrhonotus liocephalus</i>     | -42.89  | 16.37  | 3.73   | -1.89  | -1.68 | -0.41 | -0.13 |
| <i>Cercosaura argulus</i>          | 44.52   | -10.49 | 3.33   | 0.81   | 0.06  | -0.77 | 0.24  |
| <i>Cercosaura ocellata</i>         | 36.13   | -12.61 | 2.17   | 1.60   | 0.39  | -0.18 | 0.14  |
| <i>Eumeces fasciatus</i>           | 18.03   | -8.41  | 1.81   | 2.19   | 0.22  | -0.80 | 0.06  |
| <i>Eumeces inexpectatus</i>        | 12.52   | -8.50  | 1.35   | 2.61   | 0.23  | -1.12 | 0.05  |
| <i>Diplodactylus damaeus</i>       | 36.09   | -8.66  | 2.77   | -0.80  | -0.54 | -0.51 | 0.26  |
| <i>Amphiglossus macrocercus</i>    | 19.14   | -2.09  | 0.27   | 1.56   | -0.52 | -0.18 | -0.04 |
| <i>Alopoglossus carinicaudatus</i> | 31.63   | -7.77  | 1.43   | -0.07  | -0.45 | 0.17  | 0.13  |



|                                       |         |        |       |       |       |       |       |
|---------------------------------------|---------|--------|-------|-------|-------|-------|-------|
| <i>Colobodactylus tanuayi</i>         | 37.59   | -3.24  | -0.21 | -0.11 | -0.83 | 0.60  | -0.09 |
| <i>Bipes biporus</i>                  | -57.33  | 64.67  | -4.16 | 4.73  | -0.20 | 1.77  | 2.54  |
| <i>Bipes canaliculatus</i>            | -71.23  | 71.21  | -4.56 | 4.07  | 0.05  | 1.71  | 1.82  |
| <i>Bipes tridactylus</i>              | -22.18  | 46.71  | -1.11 | 2.00  | 2.01  | 1.22  | 1.75  |
| <i>Dibamus novaeguineae</i>           | -21.36  | 49.09  | -7.41 | 0.74  | 2.46  | 0.80  | -0.48 |
| <i>Calyptommatus leiolepis</i>        | 44.29   | 13.30  | -2.50 | -2.73 | 3.45  | -0.44 | -0.06 |
| <i>Calyptommatus nicterus</i>         | 37.71   | 16.66  | -2.84 | -2.75 | 3.26  | -0.18 | -0.13 |
| <i>Calyptommatus sinebrachiatus</i>   | 40.71   | 15.55  | -2.47 | -2.73 | 3.35  | -0.38 | -0.09 |
| <i>Notobachia ablephara</i>           | 44.09   | 10.72  | -2.69 | -1.67 | 2.39  | -0.33 | -0.22 |
| <i>Procellosaurinus erythrocerus</i>  | 63.41   | -6.04  | 1.28  | 0.12  | 0.17  | 0.37  | -0.49 |
| <i>Procellosaurinus tetradactylus</i> | 65.08   | -6.14  | 1.05  | 0.23  | 0.13  | 0.27  | -0.48 |
| <i>Psilophthalmus paeminus</i>        | 60.72   | -1.46  | 0.71  | -0.18 | -0.31 | 0.29  | -0.53 |
| <i>Brachymeles gracilis</i>           | 18.63   | 10.64  | -1.03 | 0.25  | -1.80 | 0.48  | -0.17 |
| <i>Brachymeles talinis</i>            | -15.07  | 18.00  | -2.95 | 0.62  | -2.24 | 0.72  | -0.39 |
| <i>Proscelotes eggeli</i>             | 8.35    | 16.98  | -1.03 | 0.48  | -2.00 | 0.69  | -0.29 |
| <i>Pygomeles braconnieri</i>          | -32.67  | 51.09  | -7.37 | -3.07 | 0.50  | -0.90 | -0.64 |
| <i>Scelotes bipes</i>                 | 49.26   | 11.08  | -2.15 | -2.24 | 3.06  | -0.59 | -0.80 |
| <i>Scelotes gronovi</i>               | 31.86   | 19.83  | -3.57 | -2.06 | 3.02  | -0.94 | -0.16 |
| <i>Scelotes sexlineatus</i>           | 22.31   | 18.86  | -6.70 | -2.49 | 1.84  | -0.46 | -1.00 |
| <i>Voeltzkowia fierinensis</i>        | 40.70   | 15.04  | -3.30 | -1.59 | 2.83  | -0.66 | -0.91 |
| <i>Neoseps reynoldsi</i>              | 41.96   | 10.12  | -2.58 | -1.59 | 2.25  | -1.03 | -0.10 |
| <i>Bachia bresslaui</i>               | 2.89    | 32.22  | -2.19 | -2.66 | 1.78  | -0.47 | 0.29  |
| <i>Bachia dorbignyi</i>               | 35.77   | 18.69  | 0.11  | -0.81 | 1.79  | 0.01  | 1.69  |
| <i>Bachia flavescens</i>              | 33.14   | 19.21  | -0.97 | -1.61 | 2.89  | -0.64 | 0.47  |
| <i>Scincopus fasciatus</i>            | -72.53  | 0.68   | 9.27  | 1.32  | 0.94  | -2.99 | 0.07  |
| <i>Scincus scincus</i>                | -34.75  | 0.03   | 3.75  | 3.49  | 0.05  | -4.37 | 0.09  |
| <i>Sphenops boulengeri</i>            | 9.70    | 12.10  | -4.76 | 0.89  | -2.25 | 0.18  | -0.39 |
| <i>Sphenops sphenopsiformis</i>       | -1.64   | 21.42  | -7.60 | -0.71 | -0.93 | -0.84 | -1.41 |
| <i>Chalcides mionecton</i>            | 8.21    | 15.81  | -4.34 | -0.15 | -1.38 | 0.00  | -0.10 |
| <i>Sepsina angolensis</i>             | 26.28   | 16.84  | -3.25 | -0.84 | 0.06  | 0.42  | 0.07  |
| <i>Cordylus cataphractus</i>          | -10.57  | -14.04 | 6.36  | -2.85 | 0.50  | 1.13  | 0.23  |
| <i>Cordylus cordylus</i>              | -3.24   | -14.93 | 3.20  | -1.16 | 0.36  | 0.85  | 0.15  |
| <i>Cordylus jordani</i>               | -17.62  | -18.18 | 4.49  | -0.84 | 1.12  | 1.43  | 0.10  |
| <i>Cordylus warreni</i>               | -33.34  | -15.87 | 3.44  | -2.79 | 0.21  | 1.11  | 0.16  |
| <i>Platysaurus rhodesianus</i>        | -23.54  | -22.05 | 3.34  | 3.25  | 2.05  | -0.28 | 0.03  |
| <i>Pseudocordylus microlepidotus</i>  | -50.10  | -18.04 | 4.54  | -2.37 | 0.62  | 0.32  | 0.20  |
| <i>Oedura coggeri</i>                 | 15.68   | -1.79  | 5.55  | -3.71 | -1.08 | -0.06 | 0.29  |
| <i>Urosaurus ornatus</i>              | 34.65   | -15.04 | 1.98  | 0.44  | 0.34  | 0.69  | 0.15  |
| <i>Amphiglossus astrolabi</i>         | -103.12 | 26.68  | -2.88 | 3.18  | -1.86 | -1.36 | -0.66 |
| <i>Neusticurus ecleopus</i>           | 24.80   | -10.69 | 0.91  | 0.65  | -0.10 | 0.23  | 0.09  |
| <i>Neusticurus rudis</i>              | 8.91    | -13.51 | 0.98  | 0.92  | 0.00  | -1.03 | 0.18  |
| <i>Lanthanotus borneensis</i>         | -77.85  | 29.17  | -0.52 | 1.62  | -1.51 | 1.81  | -0.77 |
| <i>Barisia imbricata</i>              | -23.03  | 8.05   | 3.68  | -2.54 | -1.34 | 0.42  | -0.03 |
| <i>Celestus enneagrammus</i>          | 18.96   | 6.36   | 0.73  | -0.36 | -1.38 | 0.51  | -0.07 |
| <i>Diploglossus pleei</i>             | 6.42    | 13.91  | -0.36 | -1.51 | -2.18 | 1.16  | -0.19 |
| <i>Elgaria coerulea</i>               | -0.43   | -0.55  | 2.45  | -0.84 | -0.77 | -0.01 | 0.05  |
| <i>Elgaria kingii</i>                 | 10.48   | 5.48   | 1.91  | -0.77 | -1.29 | -0.06 | 0.00  |
| <i>Elgaria multicarinata</i>          | -25.13  | 3.90   | 3.25  | 0.44  | -0.44 | -0.50 | -0.08 |
| <i>Elgaria panamintina</i>            | -24.12  | 4.76   | 3.09  | 0.12  | -0.57 | -0.21 | -0.10 |

|                                         |         |        |        |       |       |       |       |
|-----------------------------------------|---------|--------|--------|-------|-------|-------|-------|
| <i>Elgaria paucicarinata</i>            | 1.03    | 4.62   | 1.52   | -1.61 | -1.53 | -0.13 | 0.03  |
| <i>Mesaspis moreleti</i>                | 21.83   | -0.39  | 3.20   | -0.05 | -0.47 | 0.28  | 0.04  |
| <i>Sauresia agasepsoides</i>            | 36.02   | 11.75  | -0.92  | -0.81 | -0.68 | 0.82  | 0.02  |
| <i>Wetmorena haetiana</i>               | 25.41   | 10.41  | -0.05  | -1.56 | -0.65 | 0.56  | 0.08  |
| <i>Coleonyx elegans</i>                 | 5.36    | -9.93  | 5.14   | -0.04 | 0.25  | -1.29 | 0.25  |
| <i>Gerrhosaurus major</i>               | -137.39 | 4.80   | 2.89   | -3.44 | -0.73 | 0.92  | -0.26 |
| <i>Gerrhosaurus nigrolineatus</i>       | -16.49  | -10.22 | -3.45  | -1.65 | -1.50 | -0.21 | 0.11  |
| <i>Cercosaura eigenmanni</i>            | 46.28   | -9.97  | 2.95   | 0.72  | -0.02 | -0.51 | 0.22  |
| <i>Pholidobolus montium</i>             | 35.51   | -9.21  | 0.90   | 1.44  | 0.01  | 0.36  | 0.05  |
| <i>Ptychoglossus brevifrontalis</i>     | 36.85   | -4.39  | 0.08   | -0.36 | -0.95 | 0.58  | 0.07  |
| <i>Vanzosaura rubricauda</i>            | 61.62   | -5.00  | 0.73   | 0.12  | -0.02 | 0.24  | -0.50 |
| <i>Dipsosaurus dorsalis</i>             | -58.08  | -34.75 | -8.25  | 1.92  | 1.20  | 3.42  | -0.27 |
| <i>Gambelia wislizenii</i>              | -32.92  | -35.26 | -5.17  | -0.49 | 0.48  | 1.30  | 0.13  |
| <i>Leiocephalus carinatus</i>           | -38.95  | -29.09 | -1.85  | -0.13 | 0.92  | 1.47  | 0.05  |
| <i>Meroles cuneirostris</i>             | 28.20   | -23.90 | -2.68  | -1.51 | -0.62 | 0.42  | 0.31  |
| <i>Psammodromus hispanicus</i>          | 48.07   | -14.04 | 1.18   | 0.41  | -0.12 | -0.02 | 0.22  |
| <i>Amphiglossus igneocaudatus</i>       | 38.07   | -0.55  | -2.51  | 0.49  | -1.54 | 0.07  | 0.00  |
| <i>Gongylomorphus bojeri</i>            | 40.39   | -8.27  | 0.55   | 0.99  | -0.46 | -0.45 | 0.14  |
| <i>Ameiva ameiva</i>                    | -142.29 | -49.45 | -13.94 | -4.41 | -1.86 | -3.46 | 0.53  |
| <i>Dicrodon guttulatatum</i>            | -56.58  | -38.36 | -9.65  | -1.20 | -0.66 | -0.55 | 0.25  |
| <i>Teius teyou</i>                      | -46.99  | -29.58 | -9.92  | -0.57 | -0.57 | -1.18 | 0.96  |
| <i>Varanus griseus</i>                  | -234.19 | 21.10  | 5.48   | 2.26  | 0.27  | -3.07 | -0.62 |
| <i>Xantusia vigilis</i>                 | 49.61   | -5.98  | 2.45   | 0.51  | -0.23 | 0.54  | 0.10  |
| <i>Cnemidophorus sexlineatus</i>        | 14.62   | -22.06 | -3.59  | 0.04  | -0.48 | -0.18 | 0.21  |
| <i>Eumeces longirostris</i>             | 16.25   | -13.35 | 1.20   | 2.71  | 0.43  | -1.50 | 0.14  |
| <i>Eumeces schwartzei</i>               | -24.70  | -1.07  | 0.40   | 3.89  | 0.15  | -1.48 | -0.17 |
| <i>Tracheloptychus madagascariensis</i> | 24.27   | -21.98 | -3.87  | -0.33 | -0.50 | 0.83  | 0.17  |
| <i>Zonosaurus ornatus</i>               | -41.46  | -4.48  | -3.36  | -3.53 | -2.01 | 0.88  | 0.00  |
| <i>Cercosaura quadrilineatus</i>        | 49.38   | -5.98  | 2.71   | 0.96  | -0.12 | 0.18  | 0.11  |
| <i>Proctoporus bolivianus</i>           | 31.21   | -4.01  | 1.50   | 0.67  | -0.37 | 0.48  | 0.02  |
| <i>Proctoporus simoterus</i>            | 26.23   | 2.91   | 2.04   | 0.44  | -0.77 | 0.29  | -0.03 |
| <i>Amphiglossus melanopleura</i>        | 47.17   | -2.36  | 0.06   | 0.50  | -0.90 | 0.50  | 0.03  |
| <i>Amphiglossus melanurus</i>           | 26.91   | 5.24   | -0.76  | 0.94  | -1.30 | 0.29  | -0.11 |
| <i>Amphiglossus ornaticeps</i>          | 39.94   | 8.35   | -0.41  | 0.18  | -1.68 | 0.53  | -0.09 |
| <i>Amphiglossus punctatus</i>           | 28.13   | -2.11  | 0.58   | 1.79  | -0.45 | -0.21 | -0.02 |
| <i>Amphiglossus intermedius</i>         | 23.21   | 3.81   | -2.60  | 1.31  | -1.30 | 0.89  | -0.20 |
| <i>Amphiglossus stumpffi</i>            | 4.23    | 8.22   | -2.82  | 2.44  | -1.16 | 0.85  | -0.35 |
| <i>Amphiglossus tsaratananensis</i>     | 7.95    | 9.90   | -0.46  | 0.57  | -1.50 | 0.41  | -0.19 |
| <i>Amphiglossus waterlotti</i>          | -33.47  | 10.29  | 0.23   | 2.34  | -1.04 | -1.72 | -0.21 |
| <i>Scelotes mirus</i>                   | 20.12   | 13.90  | -2.46  | 1.04  | -1.98 | 0.77  | -0.29 |
| <i>Diploglossus bilobatus</i>           | 20.92   | 5.23   | 0.99   | -1.23 | -1.47 | 0.84  | -0.03 |
| <i>Teratoscincus scincus</i>            | -20.47  | -16.28 | 6.60   | -4.00 | 0.36  | 0.94  | 0.31  |
| <i>Angolossaurus skoogi</i>             | -56.16  | -8.83  | 1.02   | 2.61  | 0.75  | -0.55 | -0.16 |
| <i>Leiolepis belliana</i>               | -52.87  | -29.06 | -6.74  | 1.09  | 0.55  | 1.99  | -0.14 |
| <i>Phrynocephalus versicolor</i>        | 26.41   | -23.61 | 1.12   | 0.25  | 1.05  | 2.37  | 0.09  |
| <i>Chalcides ocellatus</i>              | -31.10  | 11.38  | -0.78  | 2.98  | -0.93 | -0.81 | -0.34 |
| <i>Sphenodon punctatus</i>              | -153.46 | -11.42 | 6.95   | -7.41 | -0.60 | -1.53 | 0.34  |
| <i>Heloderma suspectum</i>              | -228.63 | 25.85  | 11.92  | 2.23  | 3.12  | 6.04  | -1.33 |

|                                    |        |        |       |       |       |       |       |
|------------------------------------|--------|--------|-------|-------|-------|-------|-------|
| <i>Chalcides polylepis</i>         | -21.08 | 8.45   | -0.69 | 3.47  | -0.64 | -0.78 | -0.31 |
| <i>Eumeces schneideri</i>          | -46.35 | -3.19  | -0.98 | 5.07  | 0.53  | -1.39 | -0.28 |
| <i>Scelotes caffer</i>             | 47.70  | 5.08   | -2.28 | -0.39 | 1.00  | 0.60  | 0.22  |
| <i>Lepidophyma flavimaculatum</i>  | -3.70  | -8.96  | 2.64  | 3.09  | 0.93  | -0.33 | -0.06 |
| <i>Eumeces obsoletus</i>           | -22.04 | -0.79  | 2.40  | 3.62  | 0.37  | -1.68 | -0.11 |
| <i>Chalcides chalcides</i>         | -33.05 | 43.53  | -4.94 | 0.07  | -1.40 | -0.30 | -0.36 |
| <i>Eumeces egregius</i>            | 43.90  | -1.41  | 0.69  | 1.39  | -0.69 | -0.18 | 0.03  |
| <i>Scelotes kasneri</i>            | 32.83  | 15.77  | -4.81 | -2.62 | 2.19  | -0.90 | -0.87 |
| <i>Alopoglossus atriventris</i>    | 40.74  | -10.82 | 1.89  | 0.28  | -0.19 | -0.08 | 0.19  |
| <i>Alopoglossus copii</i>          | 33.27  | -12.03 | 0.36  | 0.09  | -0.29 | 0.50  | 0.13  |
| <i>Iphisa elegans</i>              | 35.26  | -1.30  | 0.22  | -0.44 | -1.13 | 0.54  | 0.04  |
| <i>Gymnophthalmus leucomystax</i>  | 54.87  | -2.93  | 2.68  | 0.80  | 0.43  | 0.03  | -0.54 |
| <i>Leposooma percarinatum</i>      | 54.67  | -7.01  | 3.15  | 0.89  | -0.07 | -0.04 | 0.16  |
| <i>Heterodactylus imbricatus</i>   | 3.13   | 7.78   | -3.16 | -0.31 | -1.83 | 0.96  | -0.34 |
| <i>Cercosaura schreibersi</i>      | 49.42  | -6.09  | 2.83  | 0.90  | -0.14 | 0.01  | 0.13  |
| <i>Micrablepharus maximiliani</i>  | 49.86  | -6.76  | 1.40  | 0.49  | 0.37  | 0.08  | -0.51 |
| <i>Chaemasaura anguina</i>         | -19.79 | 38.32  | -4.18 | -3.66 | 0.60  | -1.71 | 0.31  |
| <i>Tetradactylus africanus</i>     | 13.58  | 26.22  | -2.14 | -5.00 | 1.19  | -1.32 | 0.58  |
| <i>Tetradactylus seps</i>          | 38.06  | -2.77  | -0.29 | -0.08 | -1.09 | 0.38  | 0.05  |
| <i>Tetradactylus tetradactylus</i> | 29.32  | 12.63  | 0.77  | -0.70 | -0.57 | -0.29 | 0.10  |
| <i>Cordylosaurus trivittata</i>    | 48.42  | -5.66  | 1.21  | 0.64  | -0.48 | 0.33  | 0.09  |
| <i>Xenosaurus grandis</i>          | -20.30 | -7.80  | 6.51  | -1.17 | 0.62  | 0.64  | 0.09  |
| <i>Podarcis sicula</i>             | 11.81  | -10.50 | -0.28 | 0.65  | -0.31 | 0.00  | 0.07  |
| <i>Shinisaurus crocodilurus</i>    | -58.39 | -5.25  | 6.68  | 1.27  | 1.25  | -0.45 | -0.07 |
| <i>Arthrosaura reticulata</i>      | 26.63  | -8.58  | 0.03  | 0.45  | -0.44 | 0.36  | 0.07  |
| <i>Amphiglossus mouroundavae</i>   | 30.69  | -3.29  | 0.62  | 2.06  | -0.26 | 0.01  | -0.03 |
| <i>Colobodactylus dalcyanus</i>    | 52.50  | -3.06  | 1.66  | 0.09  | 0.08  | 0.22  | -0.53 |
| <i>Cryptolacerta hassiaca</i>      | 17.75  | 2.45   | 2.82  | -0.98 | -1.12 | -0.42 | 0.10  |

**Table SX. PCA eigenvalues and % variance**

| PC | Eigenvalue | % Variance |
|----|------------|------------|
| 1  | 2657.75    | 86.014     |
| 2  | 406.371    | 13.152     |
| 3  | 17.5981    | 0.56953    |
| 4  | 4.86283    | 0.15738    |
| 5  | 1.74012    | 0.056316   |
| 6  | 1.36413    | 0.044148   |
| 7  | 0.226085   | 0.0073169  |

**Table SX PCA loadings**

|     | Axis 1  | Axis 2  | Axis 3   | Axis 4  | Axis 5   | Axis 6  | Axis 7   |
|-----|---------|---------|----------|---------|----------|---------|----------|
| SVL | -0.8871 | 0.4525  | -0.07671 | 0.04006 | -0.02144 | 0.01392 | -0.01117 |
| HW  | -0.1172 | -0.1215 | 0.3882   | -0.6855 | 0.00118  | 0.5923  | -0.00546 |

|         |          |          |         |          | 8        |          |          |
|---------|----------|----------|---------|----------|----------|----------|----------|
| SE      | -0.1183  | -0.1392  | 0.2059  | -0.5032  | -0.2691  | -0.7679  | 0.09427  |
| FLL     | -0.2505  | -0.3942  | 0.7096  | 0.4405   | 0.2771   | -0.08619 | -0.00548 |
| HLL     | -0.35    | -0.7762  | -0.5158 | -0.02228 | -0.03828 | 0.08385  | -0.00394 |
| Fingers | -0.00593 | -0.03635 | 0.1286  | 0.2488   | -0.7067  | 0.2022   | 0.6163   |
| Toes    | -0.00192 | -0.04439 | 0.1222  | 0.1367   | -0.5911  | 0.06266  | -0.7817  |

## 7. References

31. Maddison W. P. & Maddison, D. R. *Mesquite: A Modular System for Evolutionary Analysis*. (University of Arizona, Tucson, 2004).
32. Goloboff, P. A., Farris, J. S. & Nixon, K.C. TNT, a free program for phylogenetic analysis. *Cladistics* **24**, 774–786 (2008).
33. Ronquist, F. & Huelsenbeck, J. P. MrBayes 3: Bayesian phylogenetic inference under mixed models. *Bioinformatics* **19**, 1572–1574 (2003).
34. Lewis, P. O. A likelihood approach to estimating phylogeny from discrete morphological character data. *Syst. Biol.* **50**, 913–925 (2001).
35. Müller J. & Reisz, R. R. The phylogeny of early eureptiles: comparing parsimony and Bayesian approaches in the investigation of a basal fossil clade. *Syst. Biol.* **55**, 503–511 (2006).
36. Siebenrock, F. Das Skelet der *Lacerta Simonyi* Steind. und der Lacertidenfamilie überhaupt. *Sitzungsber. Akad. Wiss., math.-naturw. Kl.* **103**, 205–296 (1894).
37. Arnold, E. N. Towards a phylogeny and biogeography of the Lacertidae: relationships within an Old-World family of lizards derived from morphology. *Bull. Br. Mus. (Nat. Hist.) Zool.* **55**, 209–257 (1989).
38. Müller, J. Cranial osteology of *Dracaenosaurus croizeti*, a lacertid lizard from the Oligocene of France (Reptilia, Squamata). *N. Jb. Geol. Paläont. Abh.* **232**, 101–114 (2004).
39. Bellairs, A. d.'A. Observations of the cranial anatomy of *Anniella*, and a comparison with that of other burrowing lizards. *Proc. Zool. Soc. Lond.* **41**, 482–512 (1950).
40. Evans, S. E. & Barbadillo, J. Early Cretaceous lizards from Las Hoyas, Spain. *Zool. J. Linn. Soc.* **119**, 23–49 (1997).
41. Evans, S. E. & Manabe, M. 1999. Early Cretaceous Lizards from the Okurodani

- Formation of Japan. *Geobios* **32**, 889–899 (1999).
42. Gao, K. & Norell, M. A. Taxonomic composition and systematics of Late Cretaceous lizard assemblages from Ukhaa Tolgod and adjacent localities, Mongolian Gobi desert. *Bull. Am. Mus. Nat. Hist.* **249**, 1–118 (2000).
43. Rieppel, O. The skull and the jaw adductor musculature in some burrowing scincomorph lizards of the genera *Acontias*, *Typhlosaurus* and *Feylinia*. *J. Zool.* **195**, 493–528 (1981).
44. Rieppel, O. The cranial morphology of the fossorial lizard genus *Dibamus* with a consideration of its phylogenetic relationships. *J. Zool.* **204**, 289–327 (1984).
45. Rieppel, O., Conrad, J. L., Maisano, J. A. New morphological data for *Eosaniwa koehni* Haubold, 1977 and a revised phylogenetic analysis. *J. Paleont.*, **81**, 760–769 (2007).
46. Wu, X-W., Brinkman, D. A., Russell, A. P. *Sineoamphisbaena hexatabularis*, an amphisbaenian (Diapsida: Squamata) from the Upper Cretaceous redbeds at Bayan Mandahu (Inner Mongolia, People's Republic of China), and comments on the phylogenetic relationships of the Amphisbaenia *Can. J. Earth. Sci.* **33**, 541–577 (1996).
47. Galtier, N., Gouy, M. & Gautier, C. SeaView and Phylo\_win, two graphic tools for sequence alignment and molecular phylogeny. *Comput. Applic. Biosci.* **12**, 543–548 (1996).
48. Swofford, D. L. *PAUP\* phylogenetic analyses using parsimony. Version 4.08.* (Sinauer, Sunderland, 2002).
49. Hammer, Ø., Harper, D.A.T. & Ryan, P. D. PAST: Paleontological Statistics Software Package for Education and Data Analysis. *Palaeontologia Electronica* **4(1)**, 1–9 pp. [http://palaeoelectronica.org/2001\\_1/past/issue1\\_01.htm](http://palaeoelectronica.org/2001_1/past/issue1_01.htm) (2001).
